# Supplementary material
Source: PubMed Central journal article supplement (PMC3675813)

(1) Sequence assignments of peptides reported in table 1

R.SGSAKVAFSAIRSTNH.E

m/z=544.9529

Error=-0.7ppm

Z=3

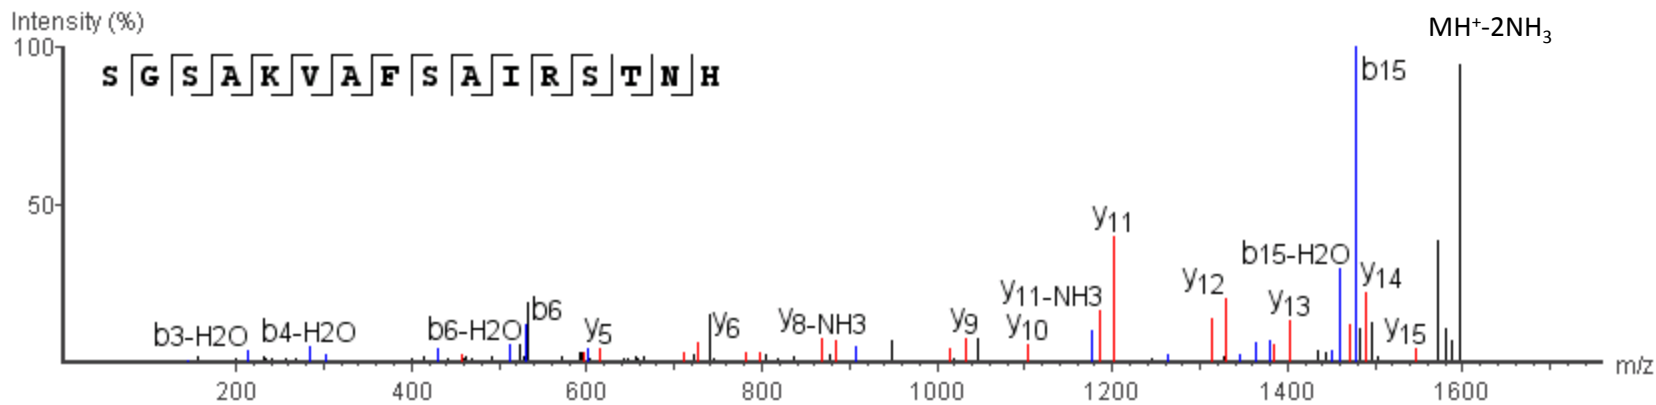

| #  | Inmonium | b         | b-H2O     | b-NH3     | a         | a-H2O     | a-NH3     | c         | c-H2O     | c-NH3     | c-H       | b(2+)    | a(2+)    | c(2+)    | Seq | x         | x-H2O     | x-NH3     | y         | y-H2O     | y-NH3     | x(2+)    | y(2+)    | #  |    |
|----|----------|-----------|-----------|-----------|-----------|-----------|-----------|-----------|-----------|-----------|-----------|----------|----------|----------|-----|-----------|-----------|-----------|-----------|-----------|-----------|----------|----------|----|----|
| 1  | 60.0449  | 88.0399   | 70.0293   | 71.0129   | 60.0449   | 42.0343   | 43.0179   | 105.0669  | 87.0563   | 88.0399   | 104.0590  | 44.5199  | 30.5224  | 53.0334  | S   |           |           |           |           |           |           |          |          |    | 16 |
| 2  | 30.0343  | 145.0613  | 127.0508  | 128.0343  | 117.0663  | 99.0558   | 100.0393  | 162.0883  | 144.0778  | 145.0613  | 161.0805  | 73.0307  | 59.0332  | 81.5442  | G   | 1571.7925 | 1553.7819 | 1554.7655 | 1545.8093 | 1527.8026 | 1528.7861 | 786.3962 | 773.4066 | 15 |    |
| 3  | 60.0449  | 232.0933  | 214.0821  | 215.0663  | 204.0983  | 186.0878  | 187.0713  | 249.1203  | 231.1098  | 232.0933  | 248.1125  | 116.5467 | 102.5492 | 125.0602 | S   | 1514.7711 | 1496.7605 | 1497.7441 | 1488.7910 | 1470.7784 | 1471.7648 | 757.8856 | 744.8959 | 14 |    |
| 4  | 44.0499  | 303.1300  | 285.1196  | 286.1035  | 275.1354  | 257.1249  | 258.1085  | 320.1574  | 302.1469  | 303.1300  | 319.1496  | 152.0652 | 138.0677 | 160.5787 | A   | 1427.7390 | 1409.7284 | 1410.7120 | 1401.7560 | 1383.7491 | 1384.7292 | 714.3695 | 701.3798 | 13 |    |
| 5  | 101.1078 | 431.2246  | 413.2148  | 414.1984  | 403.2304  | 385.2198  | 386.2034  | 448.2524  | 430.2419  | 431.2246  | 447.2446  | 216.1127 | 202.1152 | 224.6262 | K   | 1356.7019 | 1338.6913 | 1339.6749 | 1330.7212 | 1312.7120 | 1313.6926 | 678.8510 | 665.8613 | 12 |    |
| 6  | 72.0812  | 530.2908  | 512.2822  | 513.2668  | 502.2988  | 484.2883  | 485.2719  | 547.3209  | 529.3103  | 530.2908  | 546.3130  | 265.6469 | 251.6494 | 274.1604 | V   | 1228.6069 | 1210.5963 | 1211.5800 | 1202.6262 | 1184.6171 | 1185.5995 | 614.8035 | 601.8138 | 11 |    |
| 7  | 44.0499  | 601.3296  | 583.3204  | 584.3040  | 573.3359  | 555.3254  | 556.3090  | 618.3580  | 600.3474  | 601.3296  | 617.3501  | 301.1655 | 287.1680 | 309.6790 | A   | 1129.5386 | 1111.5280 | 1112.5116 | 1103.5577 | 1085.5487 | 1086.5322 | 565.2693 | 552.2796 | 10 |    |
| 8  | 120.0812 | 748.3993  | 730.3887  | 731.3723  | 720.4043  | 702.3937  | 703.3773  | 765.4263  | 747.4158  | 748.3993  | 764.4185  | 374.6996 | 360.7021 | 383.2132 | F   | 1058.5015 | 1040.4908 | 1041.4745 | 1032.5187 | 1014.5115 | 1015.4935 | 529.7507 | 516.7610 | 9  |    |
| 9  | 60.0449  | 835.4313  | 817.4208  | 818.4044  | 807.4363  | 789.4258  | 790.4094  | 852.4584  | 834.4478  | 835.4313  | 851.4505  | 418.2157 | 404.2182 | 426.7292 | S   | 911.4330  | 893.4225  | 894.4060  | 885.4539  | 867.4431  | 868.4251  | 456.2165 | 443.2268 | 8  |    |
| 10 | 44.0499  | 906.4673  | 888.4579  | 889.4415  | 878.4734  | 860.4629  | 861.4465  | 923.4955  | 905.4849  | 906.4673  | 922.4876  | 453.7342 | 439.7367 | 462.2477 | A   | 824.4010  | 806.3904  | 807.3740  | 798.4214  | 780.4111  | 781.3934  | 412.7005 | 399.7108 | 7  |    |
| 11 | 86.0969  | 1019.5525 | 1001.5419 | 1002.5255 | 991.5575  | 973.5469  | 974.5305  | 1036.5795 | 1018.5690 | 1019.5525 | 1035.5717 | 510.2762 | 496.2787 | 518.7897 | I   | 753.3639  | 735.3533  | 736.3369  | 727.3827  | 709.3740  | 710.3576  | 377.1819 | 364.1923 | 6  |    |
| 12 | 129.1139 | 1175.6465 | 1157.6431 | 1158.6266 | 1147.6586 | 1129.6481 | 1130.6316 | 1192.6805 | 1174.6700 | 1175.6465 | 1191.6727 | 588.3268 | 574.3293 | 596.8403 | R   | 640.2798  | 622.2693  | 623.2528  | 614.3002  | 596.2899  | 597.2742  | 320.6399 | 307.6502 | 5  |    |
| 13 | 60.0449  | 1262.6841 | 1244.6752 | 1245.6587 | 1234.6907 | 1216.6802 | 1217.6637 | 1279.7126 | 1261.7021 | 1262.6841 | 1278.7048 | 631.8428 | 617.8453 | 640.3563 | S   | 484.1787  | 466.1682  | 467.1517  | 458.1992  | 440.1888  | 441.1724  | 242.5894 | 229.5997 | 4  |    |
| 14 | 74.0605  | 1363.7288 | 1345.7205 | 1346.7064 | 1335.7384 | 1317.7279 | 1318.7114 | 1380.7577 | 1362.7499 | 1363.7288 | 1379.7526 | 682.3667 | 668.3692 | 690.8802 | T   | 397.1467  | 379.1362  | 380.1197  | 371.1674  | 353.1568  | 354.1404  | 199.0734 | 186.0837 | 3  |    |
| 15 | 87.0558  | 1477.7736 | 1459.7625 | 1460.7493 | 1449.7799 | 1431.7708 | 1432.7543 | 1494.8032 | 1476.7927 | 1477.7736 | 1493.7954 | 739.3881 | 725.3906 | 747.9016 | N   | 296.0990  | 278.0885  | 279.0720  | 270.1197  | 252.1091  | 253.0927  | 148.5495 | 135.5598 | 2  |    |
| 16 | 110.0717 |           |           |           |           |           |           |           |           |           |           |          |          |          | H   | 182.0561  | 164.0455  | 165.0291  | 156.0768  | 138.0662  | 139.0497  | 91.5280  | 78.5384  | 1  |    |

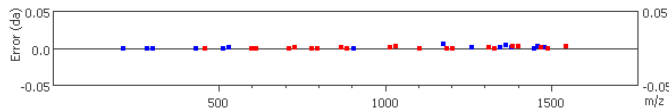

R.AVLRPDSEPRARLGALLARYIQV.R

Z=4

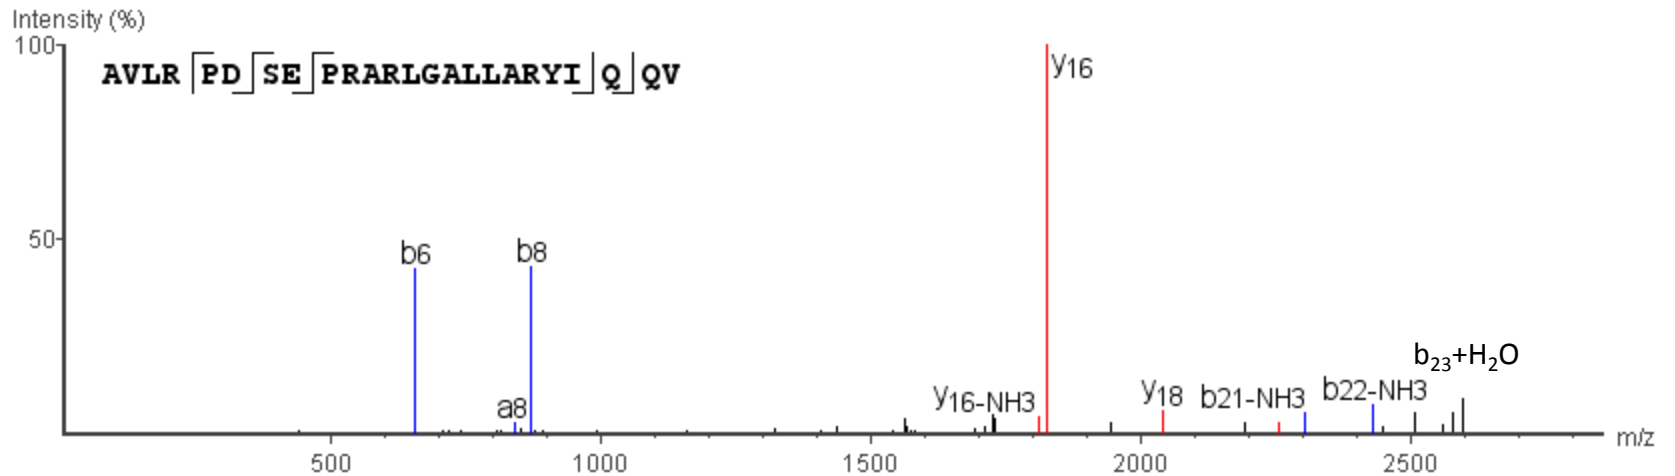

| #  | Inmonium | b         | b-H2O     | b-NH3     | a         | a-H2O     | a-NH3     | c         | c-H2O     | c-NH3     | c-H       | b(2+)     | a(2+)     | c(2+)     | Seq | x         | x-H2O     | x-NH3     | y         | y-H2O     | y-NH3     | x(2+)     | y(2+)     | #  |    |
|----|----------|-----------|-----------|-----------|-----------|-----------|-----------|-----------|-----------|-----------|-----------|-----------|-----------|-----------|-----|-----------|-----------|-----------|-----------|-----------|-----------|-----------|-----------|----|----|
| 1  | 44.0499  | 72.0449   | 54.0344   | 55.0179   | 44.0499   | 26.0394   | 27.0229   | 89.0719   | 71.0614   | 72.0449   | 88.0641   | 36.5225   | 22.5250   | 45.0360   | A   |           |           |           |           |           |           |           |           |    | 24 |
| 2  | 72.0812  | 171.1134  | 153.1028  | 154.0863  | 143.1183  | 125.1078  | 126.0914  | 188.1404  | 170.1298  | 171.1134  | 187.1325  | 86.0567   | 72.0592   | 94.5702   | V   | 2647.4790 | 2629.4685 | 2630.4521 | 2621.4998 | 2603.4893 | 2604.4727 | 1324.2395 | 1311.2499 | 23 |    |
| 3  | 86.0969  | 284.1974  | 266.1868  | 267.1704  | 256.2024  | 238.1918  | 239.1754  | 301.2244  | 283.2138  | 284.1974  | 300.2166  | 142.5987  | 128.6012  | 151.1122  | L   | 2548.4106 | 2530.4001 | 2531.3838 | 2522.4314 | 2504.4209 | 2505.4043 | 1274.7053 | 1261.7157 | 22 |    |
| 4  | 129.1139 | 440.2985  | 422.2879  | 423.2715  | 412.3035  | 394.2929  | 395.2765  | 457.3255  | 439.3149  | 440.2985  | 456.3177  | 220.6492  | 206.6517  | 229.1628  | R   | 2435.3264 | 2417.3159 | 2418.2996 | 2409.3472 | 2391.3367 | 2392.3201 | 1218.1632 | 1205.1736 | 21 |    |
| 5  | 70.0656  | 537.3513  | 519.3407  | 520.3243  | 509.3563  | 491.3457  | 492.3293  | 554.3783  | 536.3677  | 537.3513  | 553.3704  | 269.1756  | 255.1781  | 277.6891  | P   | 2279.2253 | 2261.2148 | 2262.1985 | 2253.2454 | 2235.2356 | 2236.2190 | 1140.1127 | 1127.1230 | 20 |    |
| 6  | 88.0398  | 652.3768  | 634.3676  | 635.3512  | 624.3832  | 606.3726  | 607.3562  | 669.4052  | 651.3947  | 652.3768  | 668.3973  | 326.6891  | 312.6916  | 335.2026  | D   | 2182.1726 | 2164.1621 | 2165.1458 | 2156.1934 | 2138.1829 | 2139.1663 | 1091.5863 | 1078.5967 | 19 |    |
| 7  | 60.0449  | 739.4102  | 721.3997  | 722.3832  | 711.4152  | 693.4047  | 694.3882  | 756.4373  | 738.4267  | 739.4102  | 755.4294  | 370.2051  | 356.2076  | 378.7186  | S   | 2067.1458 | 2049.1353 | 2050.1187 | 2041.1628 | 2023.1559 | 2024.1394 | 1034.0729 | 1021.0832 | 18 |    |
| 8  | 102.0554 | 868.4517  | 850.4423  | 851.4258  | 840.4570  | 822.4473  | 823.4308  | 885.4799  | 867.4693  | 868.4517  | 884.4720  | 434.7264  | 420.7289  | 443.2399  | E   | 1980.1138 | 1962.1031 | 1963.0868 | 1954.1344 | 1936.1239 | 1937.1074 | 990.5569  | 977.5672  | 17 |    |
| 9  | 70.0656  | 965.5056  | 947.4950  | 948.4786  | 937.5106  | 919.5000  | 920.4836  | 982.5326  | 964.5220  | 965.5056  | 981.5247  | 483.2528  | 469.2553  | 491.7663  | P   | 1851.0712 | 1833.0605 | 1834.0442 | 1825.0891 | 1807.0813 | 1808.0646 | 926.0356  | 913.0459  | 16 |    |
| 10 | 129.1139 | 1121.6067 | 1103.5962 | 1104.5797 | 1093.6117 | 1075.6012 | 1076.5847 | 1138.6337 | 1120.6232 | 1121.6067 | 1137.6259 | 561.3033  | 547.3058  | 569.8168  | R   | 1754.0184 | 1736.0078 | 1736.9915 | 1728.0391 | 1710.0286 | 1711.0121 | 877.5092  | 864.5195  | 15 |    |
| 11 | 44.0499  | 1192.6438 | 1174.6333 | 1175.6168 | 1164.6488 | 1146.6383 | 1147.6218 | 1209.6708 | 1191.6603 | 1192.6438 | 1208.6630 | 596.8219  | 582.8244  | 605.3354  | A   | 1597.9174 | 1579.9067 | 1580.8904 | 1571.9380 | 1553.9275 | 1554.9110 | 799.4587  | 786.4690  | 14 |    |
| 12 | 129.1139 | 1348.7449 | 1330.7344 | 1331.7179 | 1320.7499 | 1302.7394 | 1303.7229 | 1365.7719 | 1347.7614 | 1348.7449 | 1364.7640 | 674.8724  | 660.8749  | 683.3859  | R   | 1526.8802 | 1508.8696 | 1509.8533 | 1500.9009 | 1482.8904 | 1483.8739 | 763.9401  | 750.9504  | 13 |    |
| 13 | 86.0969  | 1461.8290 | 1443.8185 | 1444.8020 | 1433.8340 | 1415.8235 | 1416.8070 | 1478.8560 | 1460.8455 | 1461.8290 | 1477.8481 | 731.4145  | 717.4170  | 739.9280  | L   | 1370.7792 | 1352.7686 | 1353.7522 | 1344.7998 | 1326.7893 | 1327.7728 | 685.8896  | 672.8999  | 12 |    |
| 14 | 30.0343  | 1518.8505 | 1500.8400 | 1501.8235 | 1490.8555 | 1472.8450 | 1473.8285 | 1535.8774 | 1517.8669 | 1518.8505 | 1534.8696 | 759.9252  | 745.9277  | 768.4387  | G   | 1257.6951 | 1239.6844 | 1240.6681 | 1231.7157 | 1213.7052 | 1214.6887 | 629.3475  | 616.3578  | 11 |    |
| 15 | 44.0499  | 1589.8876 | 1571.8771 | 1572.8606 | 1561.8926 | 1543.8821 | 1544.8656 | 1606.9146 | 1588.9041 | 1589.8876 | 1605.9067 | 795.4438  | 781.4463  | 803.9573  | A   | 1200.6736 | 1182.6630 | 1183.6466 | 1174.6942 | 1156.6837 | 1157.6672 | 600.8368  | 587.8471  | 10 |    |
| 16 | 86.0969  | 1702.9716 | 1684.9611 | 1685.9446 | 1674.9766 | 1656.9661 | 1657.9496 | 1719.9985 | 1701.9880 | 1702.9716 | 1718.9907 | 851.9858  | 837.9883  | 860.4993  | L   | 1129.6365 | 1111.6259 | 1112.6095 | 1103.6571 | 1085.6466 | 1086.6301 | 565.3182  | 552.3286  | 9  |    |
| 17 | 86.0969  | 1816.0557 | 1798.0452 | 1799.0287 | 1788.0607 | 1770.0502 | 1771.0337 | 1833.0826 | 1815.0721 | 1816.0557 | 1832.0748 | 908.5278  | 894.5303  | 917.0413  | L   | 1016.5524 | 998.5419  | 999.5254  | 990.5731  | 972.5625  | 973.5461  | 508.7762  | 495.7865  | 8  |    |
| 18 | 44.0499  | 1887.0928 | 1869.0823 | 1870.0658 | 1859.0978 | 1841.0873 | 1842.0708 | 1904.1198 | 1886.1093 | 1887.0928 | 1903.1119 | 944.0464  | 930.0489  | 952.5599  | A   | 903.4684  | 885.4578  | 886.4414  | 877.4890  | 859.4785  | 860.4620  | 452.2342  | 439.2445  | 7  |    |
| 19 | 129.1139 | 2043.1938 | 2025.1833 | 2026.1669 | 2015.1989 | 1997.1884 | 1998.1719 | 2060.2209 | 2042.2103 | 2043.1938 | 2059.2131 | 1022.0969 | 1008.0994 | 1030.6105 | R   | 832.4313  | 814.4207  | 815.4043  | 806.4519  | 788.4413  | 789.4249  | 416.7156  | 403.7260  | 6  |    |
| 20 | 136.0761 | 2206.2571 | 2188.2466 | 2189.2300 | 2178.2622 | 2160.2515 | 2161.2351 | 2223.2842 | 2205.2734 | 2206.2571 | 2222.2764 | 1103.6285 | 1089.6311 | 1112.1421 | Y   | 676.3301  | 658.3196  | 659.3031  | 650.3508  | 632.3402  | 633.3238  | 338.6651  | 325.6754  | 5  |    |
| 21 | 86.0969  | 2319.3413 | 2301.3308 | 2302.3155 | 2291.3464 | 2273.3357 | 2274.3193 | 2336.3684 | 2318.3577 | 2319.3413 | 2335.3606 | 1160.1707 | 1146.1732 | 1168.6842 | I   | 513.2668  | 495.2563  | 496.2398  | 487.2874  | 469.2769  | 470.2605  | 257.1334  | 244.1437  | 4  |    |
| 22 | 101.0714 | 2447.3999 | 2429.3894 | 2430.3667 | 2419.4050 | 2401.3943 | 2402.3779 | 2464.4270 | 2446.4163 | 2447.3999 | 2463.4192 | 1224.2000 | 1210.2025 | 1232.7135 | Q   | 400.1828  | 382.1722  | 383.1558  | 374.2034  | 356.1928  | 357.1764  | 200.5914  | 187.6017  | 3  |    |
| 23 | 101.0714 | 2575.4585 | 2557.4480 | 2558.4314 | 2547.4636 | 2529.4529 | 2530.4365 | 2592.4856 | 2574.4749 | 2575.4585 | 2591.4778 | 1288.2292 | 1274.2318 | 1296.7428 | Q   | 272.1242  | 254.1136  | 255.0972  | 246.1448  | 228.1343  | 229.1178  | 136.5621  | 123.5724  | 2  |    |
| 24 | 72.0812  |           |           |           |           |           |           |           |           |           |           |           |           |           | V   | 144.0656  | 126.0550  | 127.0386  | 118.0863  | 100.0757  | 101.0592  | 72.5328   | 59.5431   | 1  |    |

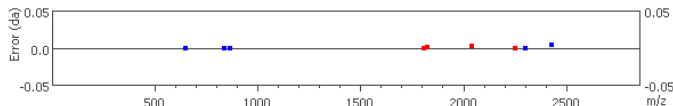

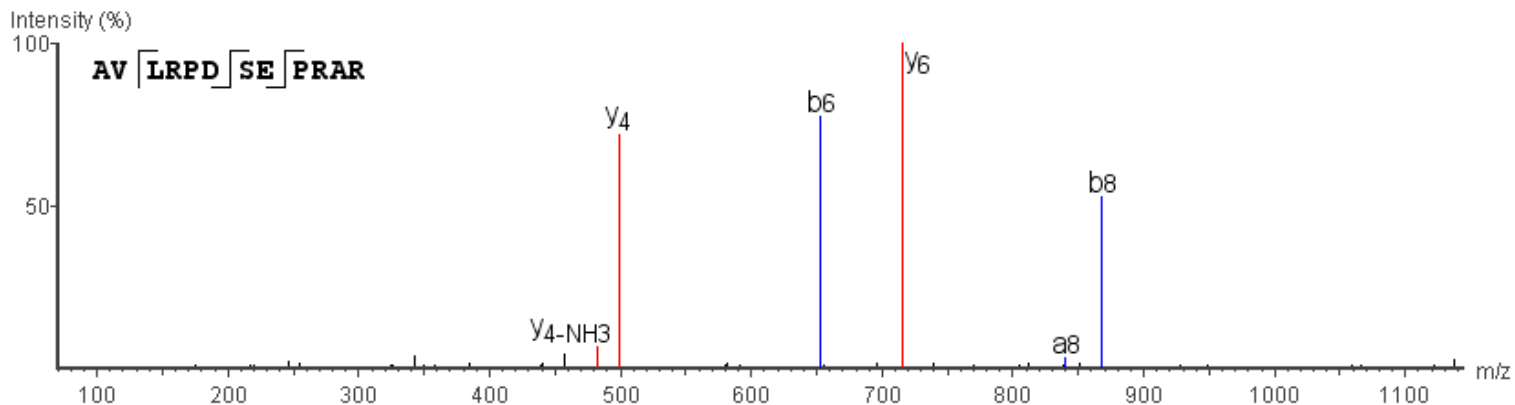

| #  | Immonium | b         | b-H2O     | b-NH3     | a         | a-H2O     | a-NH3     | c         | c-H2O     | c-NH3     | c-H       | b (2+)   | a (2+)   | c (2+)   | Seq | x         | x-H2O     | x-NH3     | y         | y-H2O     | y-NH3     | x (2+)   | y (2+)   | #  |    |
|----|----------|-----------|-----------|-----------|-----------|-----------|-----------|-----------|-----------|-----------|-----------|----------|----------|----------|-----|-----------|-----------|-----------|-----------|-----------|-----------|----------|----------|----|----|
| 1  | 44.0499  | 72.0449   | 54.0344   | 55.0179   | 44.0499   | 26.0394   | 27.0229   | 89.0719   | 71.0614   | 72.0449   | 88.0641   | 36.5225  | 22.5250  | 45.0360  | A   |           |           |           |           |           |           |          |          |    | 12 |
| 2  | 72.0812  | 171.1134  | 153.1028  | 154.0863  | 143.1183  | 125.1078  | 126.0914  | 188.1404  | 170.1298  | 171.1134  | 187.1325  | 86.0567  | 72.0592  | 94.5702  | V   | 1321.6971 | 1303.6865 | 1304.6702 | 1295.7178 | 1277.7073 | 1278.6908 | 661.3486 | 648.3589 | 11 |    |
| 3  | 86.0969  | 284.1974  | 266.1868  | 267.1704  | 256.2024  | 238.1918  | 239.1754  | 301.2244  | 283.2138  | 284.1974  | 300.2166  | 142.5987 | 128.6012 | 151.1122 | L   | 1222.6288 | 1204.6182 | 1205.6018 | 1196.6494 | 1178.6389 | 1179.6219 | 611.8144 | 598.8247 | 10 |    |
| 4  | 129.1139 | 440.2985  | 422.2879  | 423.2715  | 412.3035  | 394.2929  | 395.2765  | 457.3255  | 439.3149  | 440.2985  | 456.3177  | 220.6492 | 206.6517 | 229.1628 | R   | 1109.5447 | 1091.5341 | 1092.5177 | 1083.5653 | 1065.5548 | 1066.5383 | 555.2723 | 542.2827 | 9  |    |
| 5  | 70.0656  | 537.3513  | 519.3407  | 520.3243  | 509.3563  | 491.3457  | 492.3293  | 554.3783  | 536.3677  | 537.3513  | 553.3704  | 269.1756 | 255.1781 | 277.6891 | P   | 953.4436  | 935.4330  | 936.4166  | 927.4642  | 909.4537  | 910.4373  | 477.2218 | 464.2321 | 8  |    |
| 6  | 88.0398  | 652.3771  | 634.3676  | 635.3512  | 624.3832  | 606.3726  | 607.3562  | 669.4052  | 651.3947  | 652.3771  | 668.3973  | 326.6891 | 312.6916 | 335.2026 | D   | 856.3908  | 838.3802  | 839.3638  | 830.4114  | 812.4009  | 813.3845  | 428.6954 | 415.7057 | 7  |    |
| 7  | 60.0449  | 739.4102  | 721.3997  | 722.3832  | 711.4152  | 693.4047  | 694.3882  | 756.4373  | 738.4267  | 739.4102  | 755.4294  | 370.2051 | 356.2076 | 378.7186 | S   | 741.3639  | 723.3533  | 724.3369  | 715.3663  | 697.3740  | 698.3575  | 371.1819 | 358.1923 | 6  |    |
| 8  | 102.0554 | 868.4513  | 850.4423  | 851.4258  | 840.4570  | 822.4473  | 823.4308  | 885.4799  | 867.4693  | 868.4513  | 884.4720  | 434.7264 | 420.7289 | 443.2399 | E   | 654.3318  | 636.3213  | 637.3048  | 628.3525  | 610.3419  | 611.3255  | 327.6659 | 314.6762 | 5  |    |
| 9  | 70.0656  | 965.5056  | 947.4950  | 948.4786  | 937.5106  | 919.5000  | 920.4836  | 982.5326  | 964.5220  | 965.5056  | 981.5247  | 483.2528 | 469.2553 | 491.7663 | P   | 525.2892  | 507.2787  | 508.2623  | 499.3095  | 481.2993  | 482.2818  | 263.1446 | 250.1550 | 4  |    |
| 10 | 129.1139 | 1121.6067 | 1103.5962 | 1104.5797 | 1093.6117 | 1075.6012 | 1076.5847 | 1138.6337 | 1120.6232 | 1121.6067 | 1137.6259 | 561.3033 | 547.3058 | 569.8168 | R   | 428.2365  | 410.2260  | 411.2095  | 402.2571  | 384.2466  | 385.2302  | 214.6183 | 201.6286 | 3  |    |
| 11 | 44.0499  | 1192.6438 | 1174.6333 | 1175.6168 | 1164.6488 | 1146.6383 | 1147.6218 | 1209.6708 | 1191.6603 | 1192.6438 | 1208.6630 | 596.8219 | 582.8244 | 605.3354 | A   | 272.1354  | 254.1248  | 255.1084  | 246.1561  | 228.1455  | 229.1290  | 136.5677 | 123.5780 | 2  |    |
| 12 | 129.1139 |           |           |           |           |           |           |           |           |           |           |          |          |          | R   | 201.0983  | 183.0877  | 184.0713  | 175.1189  | 157.1084  | 158.0919  | 101.0491 | 88.0595  | 1  |    |

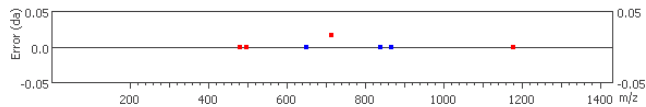

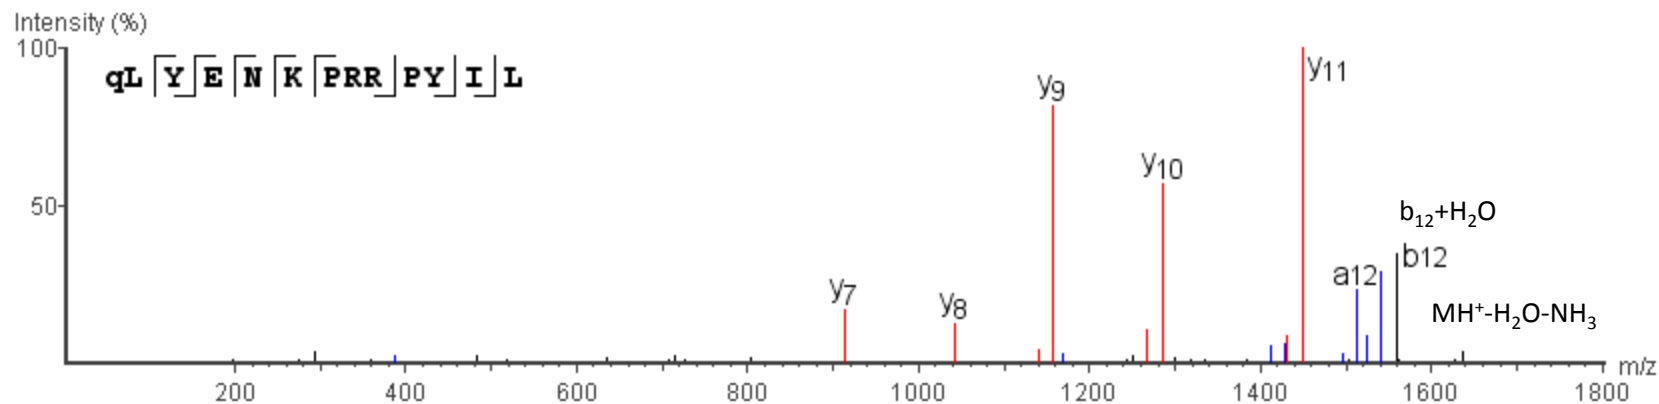

| #  | Immonium | b                | b-H2O     | b-NH3            | a                | a-H2O     | a-NH3            | c         | c-H2O     | c-NH3            | c-H       | b (2+)   | a (2+)   | c (2+)   | Seq       | x         | x-H2O     | x-NH3     | y                | y-H2O            | y-NH3            | x (2+)   | y (2+)   | #  |    |
|----|----------|------------------|-----------|------------------|------------------|-----------|------------------|-----------|-----------|------------------|-----------|----------|----------|----------|-----------|-----------|-----------|-----------|------------------|------------------|------------------|----------|----------|----|----|
| 1  | 84.0414  | 112.0364         | 94.0258   | 95.0094          | 84.0414          | 66.0308   | 67.0144          | 129.0634  | 111.0528  | 112.0364         | 128.0556  | 56.5182  | 42.5207  | 65.0317  | Q(-17.03) |           |           |           |                  |                  |                  |          |          |    | 13 |
| 2  | 86.0969  | 225.1205         | 207.1099  | 208.0935         | 197.1255         | 179.1149  | 180.0985         | 242.1475  | 224.1369  | 225.1205         | 241.1396  | 113.0602 | 99.0627  | 121.5737 | L         | 1587.8643 | 1569.8536 | 1570.8373 | 1561.8849        | 1543.8744        | 1544.8579        | 794.4321 | 781.4424 | 12 |    |
| 3  | 136.0761 | <u>388.1868</u>  | 370.1732  | 371.1568         | 360.1888         | 342.1782  | 343.1618         | 405.2108  | 387.2002  | <u>388.1868</u>  | 404.2030  | 194.5919 | 180.5944 | 203.1054 | Y         | 1474.7802 | 1456.7695 | 1457.7532 | <u>1448.7991</u> | 1430.7903        | <u>1431.7723</u> | 737.8901 | 724.9004 | 11 |    |
| 4  | 102.0554 | 517.2264         | 499.2158  | 500.1994         | 489.2314         | 471.2208  | 472.2044         | 534.2534  | 516.2429  | 517.2264         | 533.2455  | 259.1132 | 245.1157 | 267.6267 | E         | 1311.7168 | 1293.7062 | 1294.6898 | <u>1285.7363</u> | <u>1267.7256</u> | 1268.7104        | 656.3584 | 643.3687 | 10 |    |
| 5  | 87.0558  | 631.2693         | 613.2587  | 614.2423         | 603.2743         | 585.2637  | 586.2473         | 648.2963  | 630.2858  | 631.2693         | 647.2885  | 316.1346 | 302.1371 | 324.6482 | N         | 1182.6742 | 1164.6636 | 1165.6472 | <u>1156.6935</u> | 1138.6843        | <u>1139.6665</u> | 591.8371 | 578.8474 | 9  |    |
| 6  | 101.1078 | 759.3643         | 741.3537  | 742.3373         | 731.3693         | 713.3587  | 714.3423         | 776.3913  | 758.3807  | 759.3643         | 775.3834  | 380.1821 | 366.1846 | 388.6956 | K         | 1068.6313 | 1050.6207 | 1051.6044 | <u>1042.6517</u> | 1024.6415        | 1025.6250        | 534.8157 | 521.8260 | 8  |    |
| 7  | 70.0856  | 856.4170         | 838.4064  | 839.3900         | 828.4220         | 810.4114  | 811.3950         | 873.4440  | 855.4335  | 856.4170         | 872.4362  | 428.7085 | 414.7110 | 437.2220 | P         | 940.5364  | 922.5258  | 923.5094  | <u>914.5562</u>  | 896.5464         | 897.5300         | 470.7682 | 457.7785 | 7  |    |
| 8  | 129.1139 | 1012.5181        | 994.5076  | 995.4911         | 984.5231         | 966.5126  | 967.4962         | 1029.5452 | 1011.5346 | 1012.5181        | 1028.5374 | 506.7591 | 492.7616 | 515.2726 | R         | 843.4836  | 825.4730  | 826.4565  | 817.5042         | 799.4937         | 800.4772         | 422.2418 | 409.2521 | 6  |    |
| 9  | 129.1139 | <u>1168.6216</u> | 1150.6088 | 1151.5923        | 1140.6243        | 1122.6138 | 1123.5973        | 1185.6462 | 1167.6357 | <u>1168.6216</u> | 1184.6384 | 584.8096 | 570.8121 | 593.3231 | R         | 687.3825  | 669.3719  | 670.3555  | 661.4031         | 643.3926         | 644.3762         | 344.1913 | 331.2016 | 5  |    |
| 10 | 70.0856  | 1265.6720        | 1247.6615 | 1248.6450        | 1237.6770        | 1219.6665 | 1220.6500        | 1282.6990 | 1264.6885 | 1265.6720        | 1281.6912 | 633.3360 | 619.3385 | 641.8495 | P         | 531.2814  | 513.2708  | 514.2544  | 505.3020         | 487.2915         | 488.2751         | 266.1407 | 253.1510 | 4  |    |
| 11 | 136.0761 | <u>1428.7371</u> | 1410.7249 | <u>1411.7106</u> | 1400.7404        | 1382.7299 | 1383.7134        | 1445.7623 | 1427.7518 | <u>1428.7371</u> | 1444.7545 | 714.8677 | 700.8702 | 723.3812 | Y         | 434.2286  | 416.2181  | 417.2016  | 408.2493         | 390.2387         | 391.2223         | 217.6143 | 204.6246 | 3  |    |
| 12 | 86.0969  | <u>1541.8204</u> | 1523.8088 | <u>1524.7937</u> | <u>1513.8265</u> | 1495.8138 | <u>1496.7977</u> | 1558.8463 | 1540.8358 | <u>1541.8204</u> | 1557.8385 | 771.4097 | 757.4122 | 779.9232 | I         | 271.1653  | 253.1548  | 254.1383  | 245.1860         | 227.1754         | 228.1590         | 136.0827 | 123.0930 | 2  |    |
| 13 | 86.0969  |                  |           |                  |                  |           |                  |           |           |                  |           |          |          |          | L         | 158.0812  | 140.0707  | 141.0542  | 132.1019         | 114.0913         | 115.0749         | 79.5406  | 66.5509  | 1  |    |

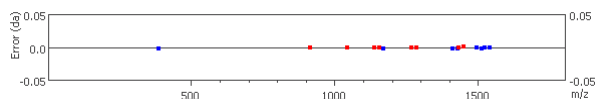

R.YGGFMRGL.K

m/z=450.7232

Z=2

Error=-0.5ppm

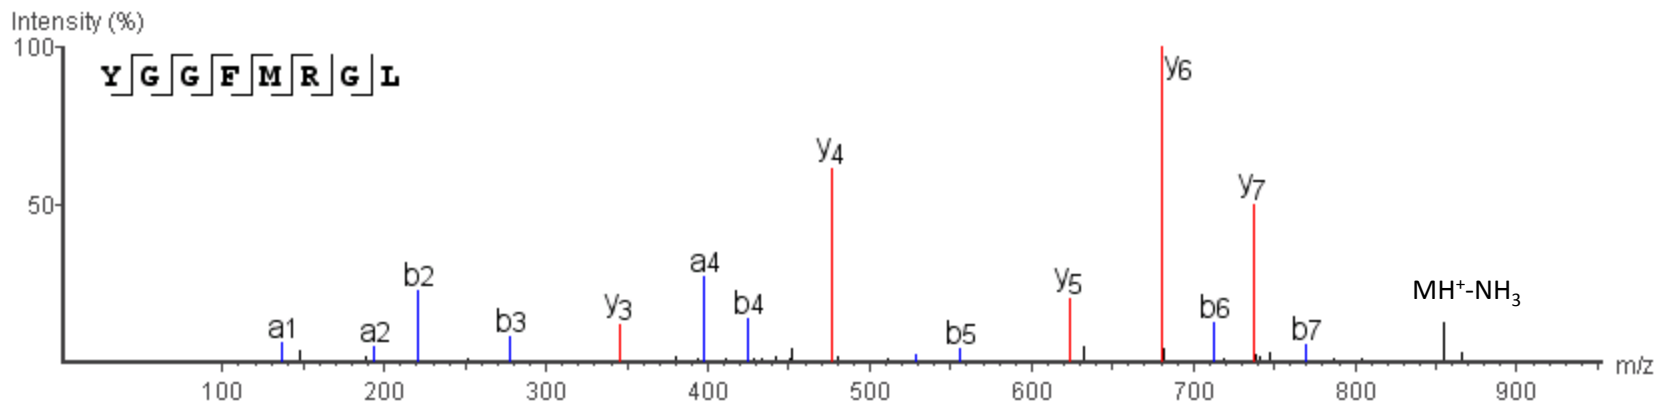

| # | Immonium | b        | b-H2O    | b-NH3    | a        | a-H2O    | a-NH3    | c        | c-H2O    | c-NH3    | c-H      | b (2+)   | a (2+)   | c (2+)   | Seq | x        | x-H2O    | x-NH3    | y        | y-H2O    | y-NH3    | x (2+)   | y (2+)   | # |   |
|---|----------|----------|----------|----------|----------|----------|----------|----------|----------|----------|----------|----------|----------|----------|-----|----------|----------|----------|----------|----------|----------|----------|----------|---|---|
| 1 | 136.0761 | 164.0712 | 146.0606 | 147.0441 | 136.0754 | 118.0656 | 119.0491 | 181.0981 | 163.0876 | 164.0712 | 180.0903 | 82.5356  | 68.5381  | 91.0491  | Y   |          |          |          |          |          |          |          |          |   | 8 |
| 2 | 30.0343  | 221.0921 | 203.0820 | 204.0656 | 193.0971 | 175.0870 | 176.0706 | 238.1196 | 220.1090 | 221.0921 | 237.1118 | 111.0463 | 97.0488  | 119.5598 | G   | 763.3557 | 745.3451 | 746.3286 | 737.3754 | 719.3657 | 720.3493 | 382.1778 | 369.1881 | 7 |   |
| 3 | 30.0343  | 278.1135 | 260.1035 | 261.0871 | 250.1191 | 232.1085 | 233.0921 | 295.1411 | 277.1305 | 278.1135 | 294.1333 | 139.5570 | 125.5595 | 148.0705 | G   | 706.3342 | 688.3236 | 689.3071 | 680.3540 | 662.3442 | 663.3278 | 353.6671 | 340.6774 | 6 |   |
| 4 | 120.0812 | 425.1819 | 407.1719 | 408.1555 | 397.1868 | 379.1769 | 380.1605 | 442.2095 | 424.1989 | 425.1819 | 441.2017 | 213.0912 | 199.0937 | 221.6047 | F   | 649.3127 | 631.3022 | 632.2858 | 623.3324 | 605.3228 | 606.3064 | 325.1564 | 312.1667 | 5 |   |
| 5 | 104.0533 | 556.2213 | 538.2124 | 539.1960 | 528.2269 | 510.2174 | 511.2010 | 573.2500 | 555.2394 | 556.2213 | 572.2421 | 278.6115 | 264.6140 | 287.1250 | M   | 502.2443 | 484.2338 | 485.2173 | 476.2645 | 458.2544 | 459.2380 | 251.6222 | 238.6325 | 4 |   |
| 6 | 129.1139 | 712.3228 | 694.3135 | 695.2971 | 684.3291 | 666.3185 | 667.3021 | 729.3511 | 711.3406 | 712.3228 | 728.3433 | 356.6620 | 342.6646 | 365.1756 | R   | 371.2038 | 353.1933 | 354.1768 | 345.2246 | 327.2139 | 328.1975 | 186.1019 | 173.1122 | 3 |   |
| 7 | 30.0343  | 769.3444 | 751.3350 | 752.3185 | 741.3505 | 723.3400 | 724.3235 | 786.3726 | 768.3620 | 769.3444 | 785.3647 | 385.1728 | 371.1753 | 393.6863 | G   | 215.1027 | 197.0922 | 198.0757 | 189.1234 | 171.1128 | 172.0964 | 108.0514 | 95.0617  | 2 |   |
| 8 | 86.0969  |          |          |          |          |          |          |          |          |          |          |          |          |          | L   | 158.0812 | 140.0707 | 141.0542 | 132.1019 | 114.0913 | 115.0749 | 79.5406  | 66.5509  | 1 |   |

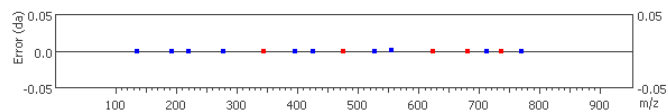

R.YGGFMRF

m/z=439.2048

Error=-0.2ppm

Z=2

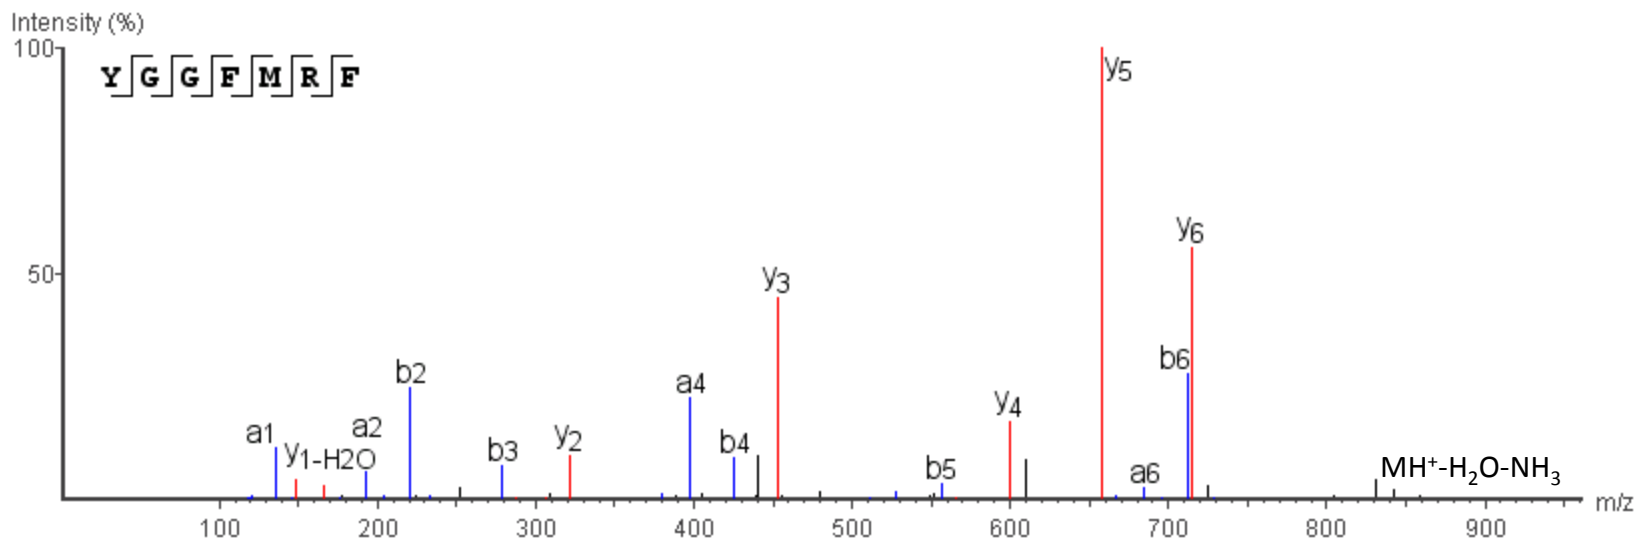

| # | Immonium | b        | b-H2O    | b-NH3    | a        | a-H2O    | a-NH3    | c        | c-H2O    | c-NH3    | c-H      | b (2+)   | a (2+)   | c (2+)   | Seq | x        | x-H2O    | x-NH3    | y        | y-H2O    | y-NH3    | x (2+)   | y (2+)   | # |   |
|---|----------|----------|----------|----------|----------|----------|----------|----------|----------|----------|----------|----------|----------|----------|-----|----------|----------|----------|----------|----------|----------|----------|----------|---|---|
| 1 | 136.0761 | 164.0712 | 146.0606 | 147.0441 | 136.0755 | 118.0656 | 119.0491 | 181.0981 | 163.0876 | 164.0712 | 180.0903 | 82.5356  | 68.5381  | 91.0491  | Y   |          |          |          |          |          |          |          |          |   | 7 |
| 2 | 30.0343  | 221.0922 | 203.0820 | 204.0656 | 193.0972 | 175.0870 | 176.0706 | 238.1196 | 220.1090 | 221.0922 | 237.1118 | 111.0463 | 97.0488  | 119.5598 | G   | 740.3185 | 722.3080 | 723.2915 | 714.3387 | 696.3286 | 697.3122 | 370.6593 | 357.6696 | 6 |   |
| 3 | 30.0343  | 278.1141 | 260.1035 | 261.0871 | 250.1191 | 232.1085 | 233.0921 | 295.1411 | 277.1305 | 278.1141 | 294.1333 | 139.5570 | 125.5595 | 148.0705 | G   | 683.2971 | 665.2865 | 666.2700 | 657.3171 | 639.3071 | 640.2907 | 342.1485 | 329.1588 | 5 |   |
| 4 | 120.0812 | 425.1821 | 407.1719 | 408.1555 | 397.1873 | 379.1769 | 380.1605 | 442.2095 | 424.1989 | 425.1821 | 441.2017 | 213.0912 | 199.0937 | 221.6047 | F   | 626.2756 | 608.2651 | 609.2487 | 600.2960 | 582.2857 | 583.2693 | 313.6378 | 300.6481 | 4 |   |
| 5 | 104.0533 | 556.2224 | 538.2124 | 539.1960 | 528.2280 | 510.2174 | 511.2010 | 573.2500 | 555.2394 | 556.2224 | 572.2421 | 278.6115 | 264.6140 | 287.1250 | M   | 479.2072 | 461.1967 | 462.1802 | 453.2277 | 435.2173 | 436.2009 | 240.1036 | 227.1139 | 3 |   |
| 6 | 129.1139 | 712.3234 | 694.3135 | 695.2971 | 684.3289 | 666.3185 | 667.3021 | 729.3511 | 711.3406 | 712.3234 | 728.3433 | 356.6620 | 342.6646 | 365.1756 | R   | 348.1667 | 330.1561 | 331.1397 | 322.1876 | 304.1768 | 305.1603 | 174.5833 | 161.5937 | 2 |   |
| 7 | 120.0812 |          |          |          |          |          |          |          |          |          |          |          |          |          | F   | 192.0656 | 174.0550 | 175.0386 | 166.0862 | 148.0756 | 149.0592 | 96.5328  | 83.5431  | 1 |   |

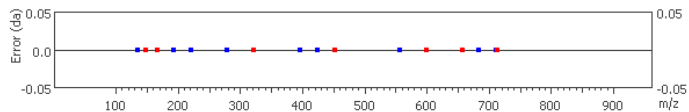

R.YGGFM.R

m/z=574.2346

Error=2.9ppm

Z=1

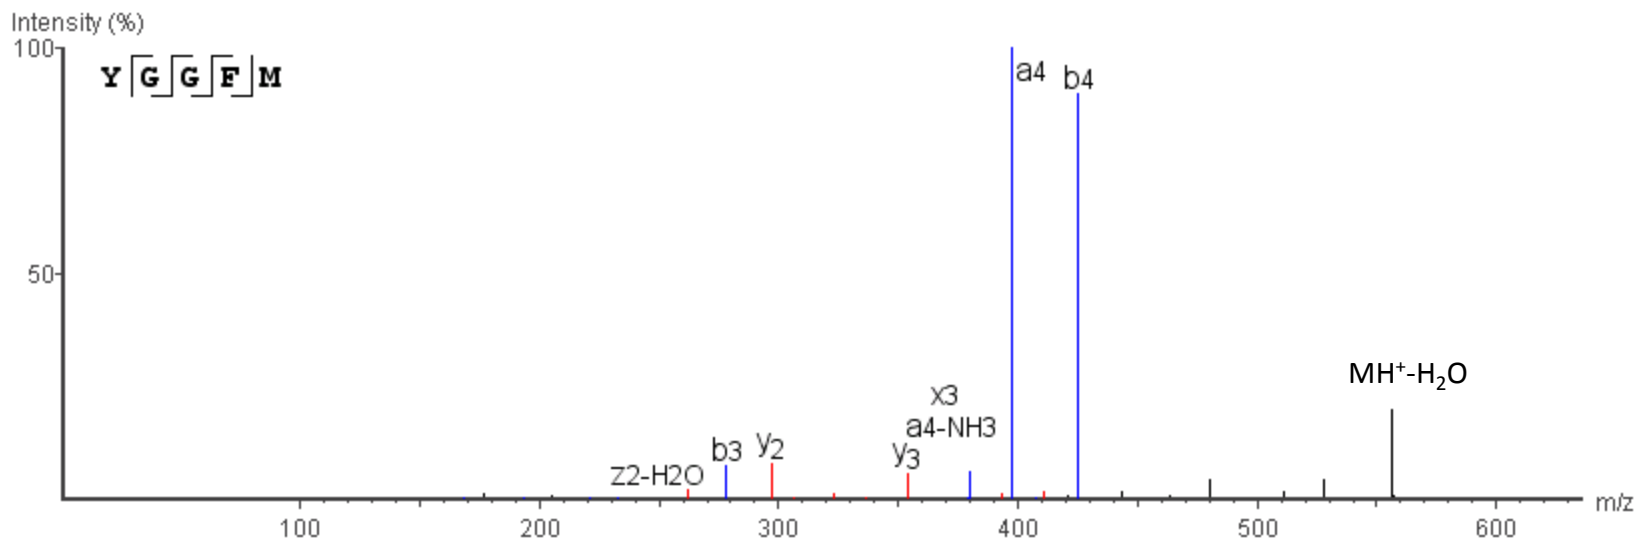

| # | Immonium | b        | b-H2O    | b-NH3    | a        | a-H2O    | a-NH3    | c        | c-H2O    | c-NH3    | c-H      | b (2+)   | a (2+)   | c (2+)   | Seq | x        | x-H2O    | x-NH3    | y        | y-H2O    | y-NH3    | x (2+)   | y (2+)   | # |   |
|---|----------|----------|----------|----------|----------|----------|----------|----------|----------|----------|----------|----------|----------|----------|-----|----------|----------|----------|----------|----------|----------|----------|----------|---|---|
| 1 | 136.0761 | 164.0712 | 146.0606 | 147.0441 | 136.0761 | 118.0656 | 119.0491 | 181.0981 | 163.0876 | 164.0712 | 180.0903 | 82.5356  | 68.5381  | 91.0491  | Y   |          |          |          |          |          |          |          |          |   | 5 |
| 2 | 30.0343  | 221.0926 | 203.0820 | 204.0656 | 193.0976 | 175.0870 | 176.0706 | 238.1196 | 220.1090 | 221.0926 | 237.1118 | 111.0463 | 97.0488  | 119.5598 | G   | 437.1490 | 419.1385 | 420.1220 | 411.1696 | 393.1591 | 394.1427 | 219.0745 | 206.0848 | 4 |   |
| 3 | 30.0343  | 278.1147 | 260.1035 | 261.0871 | 250.1191 | 232.1085 | 233.0921 | 295.1411 | 277.1305 | 278.1147 | 294.1333 | 139.5570 | 125.5595 | 148.0705 | G   | 380.1617 | 362.1170 | 363.1006 | 354.1496 | 336.1376 | 337.1212 | 190.5638 | 177.5741 | 3 |   |
| 4 | 120.0812 | 425.1831 | 407.1719 | 408.1555 | 397.1883 | 379.1769 | 380.1617 | 442.2095 | 424.1989 | 425.1831 | 441.2017 | 213.0912 | 199.0937 | 221.6047 | F   | 323.1061 | 305.0955 | 306.0791 | 297.1276 | 279.1161 | 280.0997 | 162.0530 | 149.0634 | 2 |   |
| 5 | 104.0533 |          |          |          |          |          |          |          |          |          |          |          |          |          | M   | 176.0377 | 158.0271 | 159.0107 | 150.0583 | 132.0478 | 133.0313 | 88.5188  | 75.5292  | 1 |   |

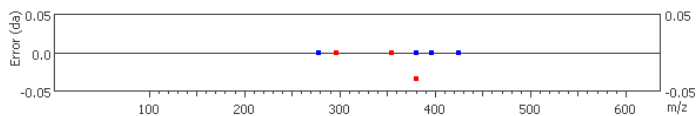



R.YGGFLK

m/z=556.2753

Error=-2.2ppm

Z=1

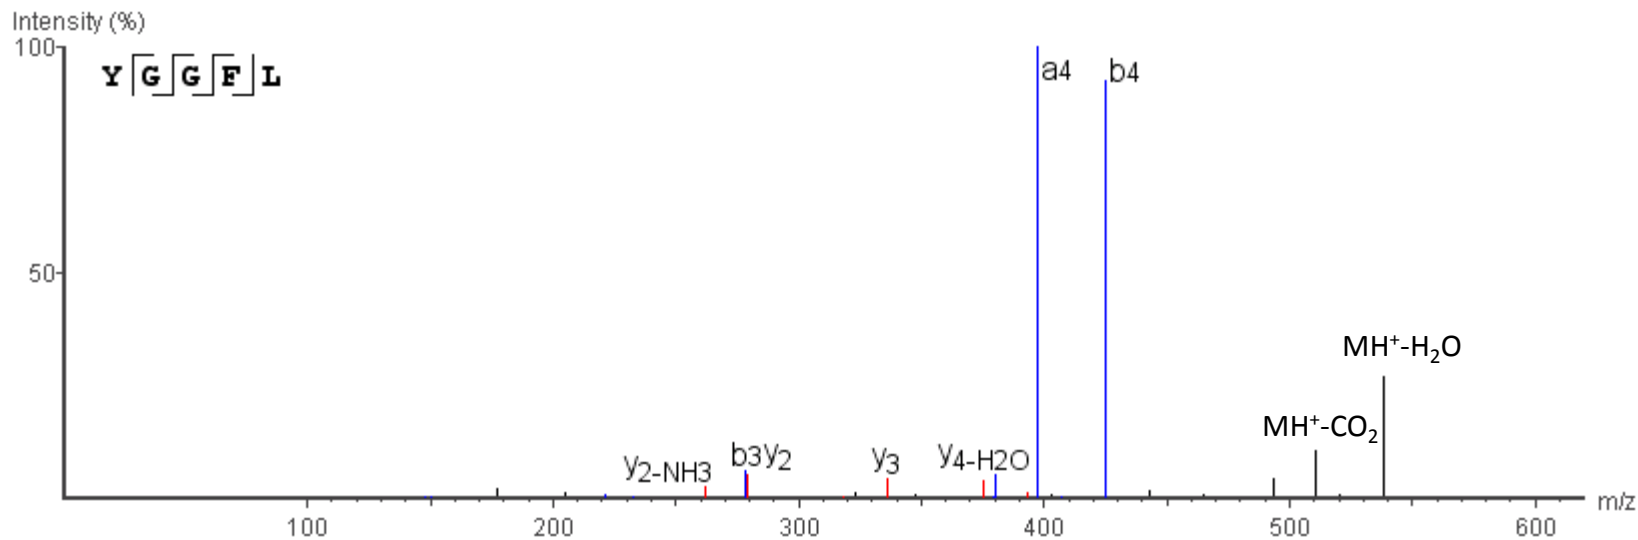

| # | Immonium | b        | b-H <sub>2</sub> O | b-NH <sub>3</sub> | a        | a-H <sub>2</sub> O | a-NH <sub>3</sub> | c        | c-H <sub>2</sub> O | c-NH <sub>3</sub> | c-H      | b (2+)   | a (2+)   | c (2+)   | Seq | x        | x-H <sub>2</sub> O | x-NH <sub>3</sub> | y        | y-H <sub>2</sub> O | y-NH <sub>3</sub> | x (2+)   | y (2+)   | # |   |
|---|----------|----------|--------------------|-------------------|----------|--------------------|-------------------|----------|--------------------|-------------------|----------|----------|----------|----------|-----|----------|--------------------|-------------------|----------|--------------------|-------------------|----------|----------|---|---|
| 1 | 136.0761 | 164.0712 | 146.0606           | 147.0441          | 136.0761 | 118.0656           | 119.0491          | 181.0981 | 163.0876           | 164.0712          | 180.0903 | 82.5356  | 68.5381  | 91.0491  | Y   |          |                    |                   |          |                    |                   |          |          |   | 5 |
| 2 | 30.0343  | 221.0926 | 203.0820           | 204.0656          | 193.0976 | 175.0870           | 176.0706          | 236.1196 | 220.1090           | 221.0926          | 237.1118 | 111.0463 | 97.0488  | 119.5598 | G   | 419.1926 | 401.1820           | 402.1656          | 393.2132 | 375.2027           | 376.1862          | 210.0963 | 197.1066 | 4 |   |
| 3 | 30.0343  | 278.1136 | 260.1035           | 261.0871          | 250.1191 | 232.1085           | 233.0921          | 295.1411 | 277.1305           | 278.1136          | 294.1333 | 139.5570 | 125.5595 | 148.0705 | G   | 362.1711 | 344.1606           | 345.1441          | 336.1918 | 318.1812           | 319.1648          | 181.5856 | 168.5959 | 3 |   |
| 4 | 120.0812 | 425.1818 | 407.1719           | 408.1555          | 397.1868 | 379.1769           | 380.1606          | 442.2095 | 424.1989           | 425.1818          | 441.2017 | 213.0912 | 199.0937 | 221.6047 | F   | 305.1497 | 287.1391           | 288.1227          | 279.1706 | 261.1597           | 262.1187          | 153.0748 | 140.0851 | 2 |   |
| 5 | 86.0969  |          |                    |                   |          |                    |                   |          |                    |                   |          |          |          |          | L   | 158.0812 | 140.0707           | 141.0542          | 132.1019 | 114.0913           | 115.0749          | 79.5406  | 66.5509  | 1 |   |

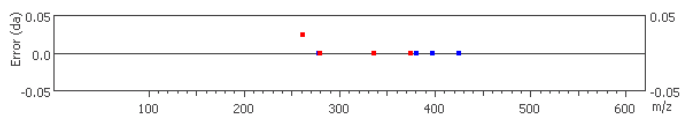

F.MRGLK

m/z=476.2649

Error=-0.1ppm

Z=1

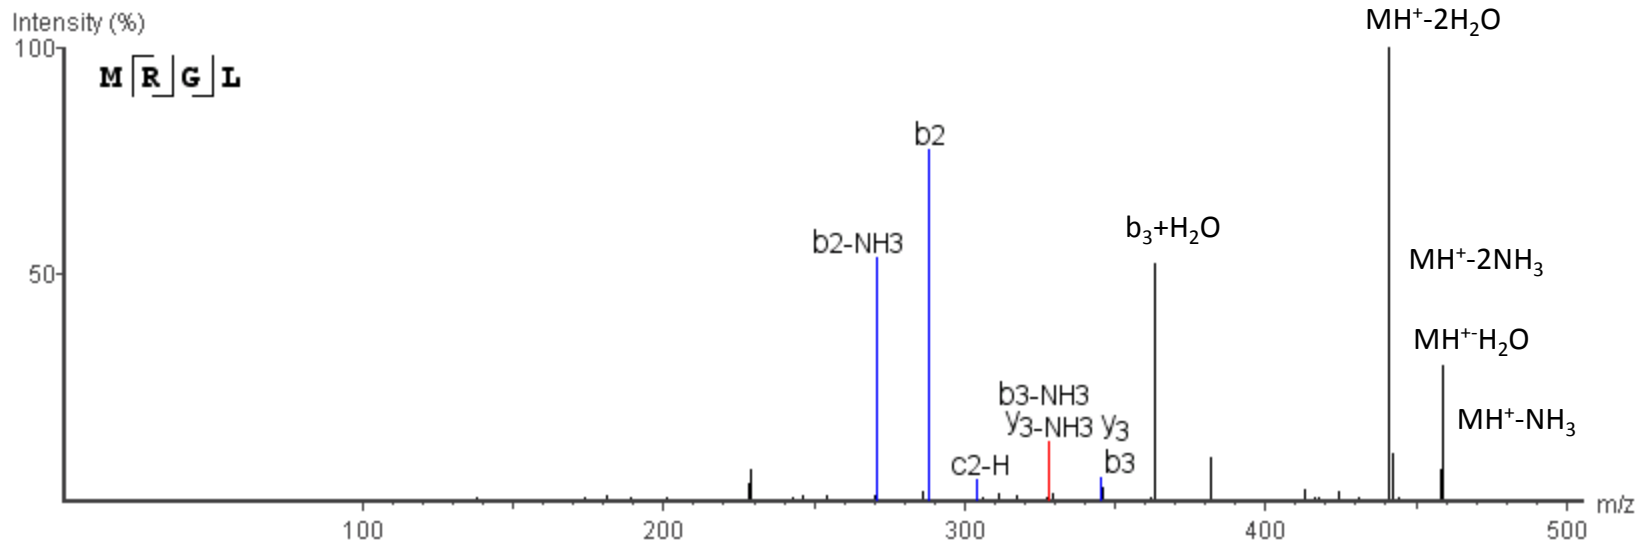

| # | Immonium | b        | b+H2O    | b-NH3    | a        | a+H2O    | a-NH3    | c        | c+H2O    | c-NH3    | c-H      | b (2+)   | a (2+)   | c (2+)   | Seq | x        | x+H2O    | x-NH3    | y        | y+H2O    | y-NH3    | x (2+)   | y (2+)   | # |
|---|----------|----------|----------|----------|----------|----------|----------|----------|----------|----------|----------|----------|----------|----------|-----|----------|----------|----------|----------|----------|----------|----------|----------|---|
| 1 | 104.0533 | 132.0483 | 114.0378 | 115.0213 | 104.0533 | 86.0428  | 87.0263  | 149.0753 | 131.0648 | 132.0483 | 148.0675 | 66.5242  | 52.5267  | 75.0377  | M   | 371.2038 | 353.1933 | 354.1768 | 345.2250 | 327.2139 | 328.1904 | 186.1019 | 173.1122 | 4 |
| 2 | 129.1139 | 288.1487 | 270.1389 | 271.1223 | 260.1544 | 242.1439 | 243.1274 | 305.1764 | 287.1659 | 288.1487 | 304.1693 | 144.5747 | 130.5772 | 153.0882 | R   | 215.1027 | 197.0922 | 198.0757 | 189.1234 | 171.1128 | 172.0964 | 108.0514 | 95.0617  | 2 |
| 3 | 30.0343  | 345.1708 | 327.1603 | 328.1442 | 317.1759 | 299.1653 | 300.1489 | 362.1979 | 344.1873 | 345.1708 | 361.1901 | 173.0854 | 159.0879 | 181.5969 | G   | 158.0812 | 140.0707 | 141.0542 | 132.1019 | 114.0913 | 115.0749 | 79.5406  | 66.5509  | 1 |
| 4 | 86.0969  |          |          |          |          |          |          |          |          |          |          |          |          |          | L   |          |          |          |          |          |          |          |          |   |

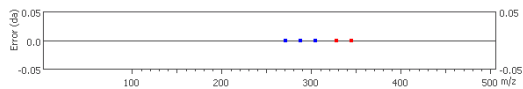

YGGFLRKYPK.R

m/z=614.8452

Error=-0.4ppm

Z=2

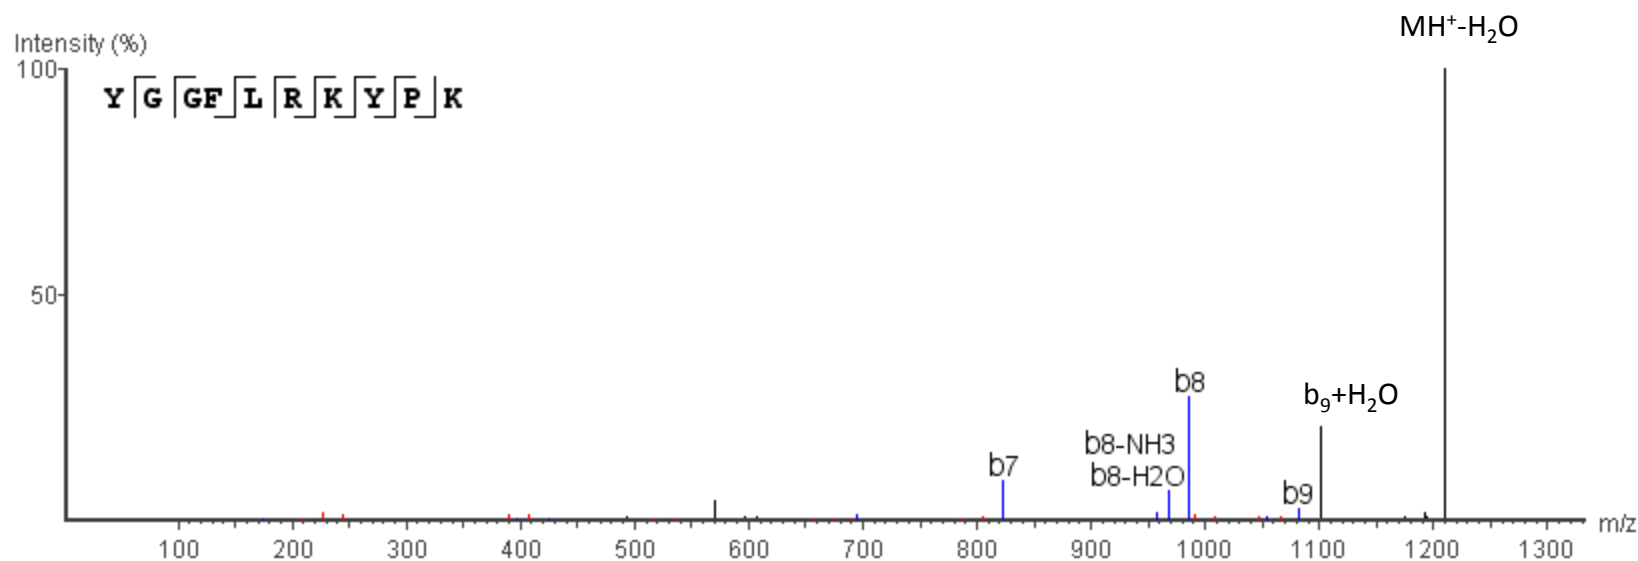

| #  | Immonium | b                | b-H2O           | b-NH3     | a         | a-H2O     | a-NH3     | c         | c-H2O     | c-NH3            | c-H       | b (2+)   | a (2+)   | c (2+)   | Seq | x         | x-H2O     | x-NH3     | y         | y-H2O     | y-NH3     | x (2+)   | y (2+)   | # |    |
|----|----------|------------------|-----------------|-----------|-----------|-----------|-----------|-----------|-----------|------------------|-----------|----------|----------|----------|-----|-----------|-----------|-----------|-----------|-----------|-----------|----------|----------|---|----|
| 1  | 136.0761 | 164.0712         | 146.0606        | 147.0441  | 136.0761  | 118.0656  | 119.0491  | 181.0981  | 163.0876  | 164.0712         | 180.0903  | 82.5356  | 68.5381  | 91.0491  | Y   |           |           |           |           |           |           |          |          |   | 10 |
| 2  | 30.0343  | 221.0926         | 203.0820        | 204.0656  | 193.0976  | 175.0870  | 176.0706  | 238.1196  | 220.1090  | 221.0926         | 237.1118  | 111.0463 | 97.0488  | 119.5598 | G   | 1091.5997 | 1073.5891 | 1074.5728 | 1065.6204 | 1047.6099 | 1048.5934 | 546.2999 | 533.3102 | 9 |    |
| 3  | 30.0343  | 278.1141         | 260.1035        | 261.0871  | 250.1191  | 232.1085  | 233.0921  | 295.1411  | 277.1305  | 278.1141         | 294.1333  | 139.5570 | 125.5595 | 148.0705 | G   | 1034.5782 | 1016.5677 | 1017.5513 | 1008.5989 | 990.5883  | 991.5719  | 517.7891 | 504.7994 | 8 |    |
| 4  | 120.0812 | 425.1825         | 407.1719        | 408.1555  | 397.1875  | 379.1769  | 380.1605  | 442.2095  | 424.1989  | 425.1825         | 441.2017  | 213.0912 | 199.0937 | 221.6047 | F   | 977.5568  | 959.5462  | 960.5298  | 951.5774  | 933.5668  | 934.5504  | 469.2784 | 476.2887 | 7 |    |
| 5  | 86.0969  | 538.2665         | 520.2560        | 521.2396  | 510.2715  | 492.2610  | 493.2446  | 555.2936  | 537.2830  | 538.2665         | 554.2857  | 269.6333 | 255.6358 | 278.1468 | L   | 830.4683  | 812.4778  | 813.4613  | 804.5090  | 786.4984  | 787.4820  | 415.7442 | 402.7545 | 6 |    |
| 6  | 129.1139 | 694.3676         | 676.3571        | 677.3406  | 666.3726  | 648.3621  | 649.3456  | 711.3947  | 693.3841  | 694.3676         | 710.3868  | 347.6838 | 333.6863 | 356.1973 | R   | 717.4043  | 699.3937  | 700.3773  | 691.4249  | 673.4144  | 674.3979  | 359.2021 | 346.2125 | 5 |    |
| 7  | 101.1078 | <u>822.4619</u>  | 804.4520        | 805.4356  | 794.4676  | 776.4570  | 777.4406  | 839.4896  | 821.4791  | <u>822.4619</u>  | 838.4818  | 411.7313 | 397.7338 | 420.2448 | K   | 561.3032  | 543.2926  | 544.2761  | 535.3238  | 517.3132  | 518.2968  | 281.1516 | 268.1619 | 4 |    |
| 8  | 136.0761 | <u>985.5252</u>  | <u>967.5151</u> | 968.4989  | 957.5309  | 939.5203  | 940.5039  | 1002.5529 | 984.5424  | <u>985.5252</u>  | 1001.5450 | 493.2629 | 479.2654 | 501.7765 | Y   | 433.2082  | 415.1977  | 416.1812  | 407.2289  | 389.2183  | 390.2019  | 217.1041 | 204.1144 | 3 |    |
| 9  | 70.0656  | <u>1082.5776</u> | 1064.5681       | 1065.5516 | 1054.5836 | 1036.5731 | 1037.5566 | 1099.6056 | 1081.5951 | <u>1082.5776</u> | 1098.5978 | 541.7893 | 527.7918 | 550.3028 | P   | 270.1449  | 252.1343  | 253.1179  | 244.1655  | 226.1550  | 227.1385  | 135.5724 | 122.5828 | 2 |    |
| 10 | 101.1078 |                  |                 |           |           |           |           |           |           |                  |           |          |          |          | K   | 173.0921  | 155.0816  | 156.0651  | 147.1128  | 129.1022  | 130.0858  | 87.0461  | 74.0564  | 1 |    |

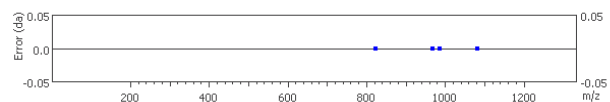

R.EIGDEENSAKFPI(-.98).G

m/z=724.3577

Z=2

Error=1.3ppm

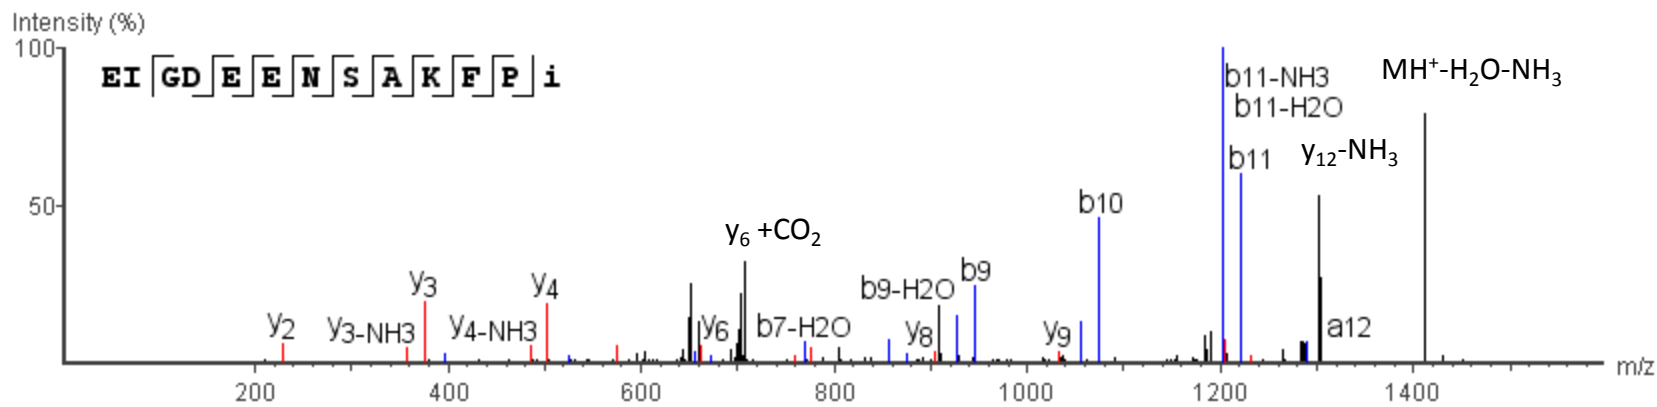

| #  | Immonium | b                | b-H2O            | b-NH3            | a                | a-H2O     | a-NH3     | c         | c-H2O     | c-NH3            | c-H       | b(2+)    | a(2+)    | c(2+)    | Seq     | x                | x-H2O     | x-NH3     | y                | y-H2O     | y-NH3           | x(2+)    | y(2+)    | #  |    |
|----|----------|------------------|------------------|------------------|------------------|-----------|-----------|-----------|-----------|------------------|-----------|----------|----------|----------|---------|------------------|-----------|-----------|------------------|-----------|-----------------|----------|----------|----|----|
| 1  | 102.0554 | 130.0504         | 112.0399         | 113.0234         | 102.0554         | 84.0449   | 85.0284   | 147.0774  | 129.0668  | 130.0504         | 146.0696  | 65.5252  | 51.5277  | 74.0387  | E       |                  |           |           |                  |           |                 |          |          |    | 13 |
| 2  | 86.0969  | 243.1345         | 225.1239         | 226.1075         | 215.1395         | 197.1289  | 198.1125  | 260.1615  | 242.1509  | 243.1345         | 259.1537  | 122.0672 | 108.0697 | 130.5807 | I       | 1344.6471        | 1326.6365 | 1327.6201 | 1318.6677        | 1300.6572 | 1301.6407       | 672.8235 | 659.8339 | 12 |    |
| 3  | 30.0343  | 300.1559         | 282.1454         | 283.1289         | 272.1609         | 254.1504  | 255.1339  | 317.1829  | 299.1724  | 300.1559         | 316.1751  | 150.5780 | 136.5805 | 159.0915 | G       | <b>1231.5508</b> | 1213.5524 | 1214.5360 | <b>1205.5807</b> | 1187.5731 | 1188.5566       | 616.2815 | 603.2918 | 11 |    |
| 4  | 88.0398  | 415.1829         | <b>397.1720</b>  | 398.1559         | 387.1879         | 369.1773  | 370.1609  | 432.2099  | 414.1993  | 415.1829         | 431.2021  | 208.0914 | 194.0939 | 216.6049 | D       | 1174.5415        | 1156.5309 | 1157.5145 | 1148.5621        | 1130.5516 | 1131.5352       | 587.7708 | 574.7811 | 10 |    |
| 5  | 102.0554 | 544.2255         | <b>526.2152</b>  | 527.1985         | 516.2305         | 498.2199  | 499.2035  | 561.2525  | 543.2419  | 544.2255         | 560.2446  | 272.6127 | 258.6152 | 281.1263 | E       | 1059.5145        | 1041.5040 | 1042.4875 | <b>1033.5328</b> | 1015.5247 | 1016.5082       | 530.2573 | 517.2676 | 9  |    |
| 6  | 102.0554 | <b>673.2672</b>  | <b>655.2563</b>  | 656.2411         | 645.2731         | 627.2625  | 628.2461  | 690.2951  | 672.2845  | <b>673.2672</b>  | 689.2872  | 337.1340 | 323.1365 | 345.6476 | E       | 930.4720         | 912.4615  | 913.4451  | <b>904.4868</b>  | 886.4821  | 887.4657        | 465.7360 | 452.7463 | 8  |    |
| 7  | 87.0558  | 787.3110         | <b>769.2994</b>  | 770.2840         | 759.3160         | 741.3054  | 742.2890  | 804.3380  | 786.3275  | 787.3110         | 803.3301  | 394.1555 | 380.1580 | 402.6690 | N       | 801.4294         | 783.4189  | 784.4025  | <b>775.4447</b>  | 757.4395  | <b>758.4183</b> | 401.2147 | 388.2250 | 7  |    |
| 8  | 60.0449  | <b>874.3445</b>  | <b>856.3307</b>  | 857.3160         | 846.3480         | 828.3375  | 829.3210  | 891.3701  | 873.3595  | <b>874.3445</b>  | 890.3622  | 437.6715 | 423.6740 | 446.1850 | S       | 687.3865         | 669.3759  | 670.3595  | <b>661.4034</b>  | 643.3965  | 644.3801        | 344.1932 | 331.2036 | 6  |    |
| 9  | 44.0499  | <b>945.3789</b>  | <b>927.3689</b>  | 928.3531         | 917.3851         | 899.3746  | 900.3582  | 962.4072  | 944.3966  | <b>945.3789</b>  | 961.3993  | 473.1901 | 459.1926 | 481.7036 | A       | 600.3545         | 582.3439  | 583.3275  | <b>574.3714</b>  | 556.3646  | 557.3481        | 300.6772 | 287.6876 | 5  |    |
| 10 | 101.1078 | <b>1073.4746</b> | <b>1055.4636</b> | 1056.4481        | 1045.4801        | 1027.4696 | 1028.4531 | 1090.5021 | 1072.4916 | <b>1073.4746</b> | 1089.4943 | 537.2375 | 523.2401 | 545.7510 | K       | 529.3174         | 511.3068  | 512.2904  | <b>503.3337</b>  | 485.3275  | <b>486.3072</b> | 265.1587 | 252.1690 | 4  |    |
| 11 | 120.0812 | <b>1220.5425</b> | <b>1202.5317</b> | <b>1203.5348</b> | 1192.5485        | 1174.5380 | 1175.5215 | 1237.5704 | 1219.5599 | <b>1220.5425</b> | 1236.5626 | 610.7717 | 596.7742 | 619.2852 | F       | 401.2224         | 383.2119  | 384.1954  | <b>375.2393</b>  | 357.2325  | <b>358.2128</b> | 201.1112 | 188.1215 | 3  |    |
| 12 | 70.0656  | 1317.5962        | 1299.5857        | 1300.5692        | <b>1289.6047</b> | 1271.5907 | 1272.5742 | 1334.6232 | 1316.6127 | 1317.5962        | 1333.6154 | 659.2981 | 645.3006 | 667.8116 | P       | 254.1540         | 236.1434  | 237.1270  | <b>228.1711</b>  | 210.1641  | 211.1476        | 127.5770 | 114.5873 | 2  |    |
| 13 | 85.1169  |                  |                  |                  |                  |           |           |           |           |                  |           |          |          |          | I(-.98) | 157.1012         | 139.0907  | 140.0742  | 131.1219         | 113.1113  | 114.0949        | 79.0506  | 66.0609  | 1  |    |

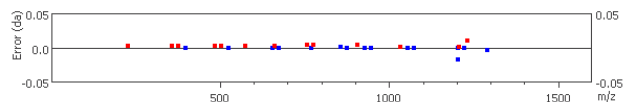

G.YPSKPDNPGEDAPAEDMARYYSALRHYINLITRQRY(-.98).G

m/z=1068.281

Z=4

Error=3.2ppm

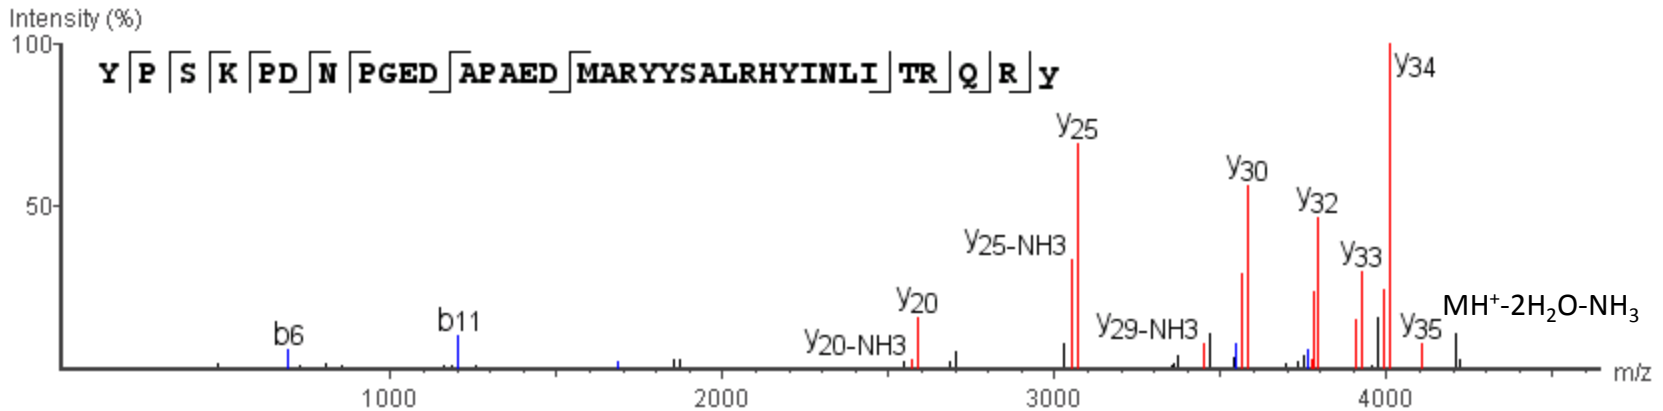

| #  | Immonium | b       | b-H2O   | b-NH3   | a       | a-H2O   | a-NH3   | c       | c-H2O   | c-NH3   | b(2+)   | a(2+)   | c(2+)   | Seq       | x       | x-H2O   | x-NH3   | y       | y-H2O   | y-NH3   | x(2+)   | y(2+)   | #  |
|----|----------|---------|---------|---------|---------|---------|---------|---------|---------|---------|---------|---------|---------|-----------|---------|---------|---------|---------|---------|---------|---------|---------|----|
| 1  | 136.08   | 164.07  | 146.06  | 147.04  | 136.08  | 118.07  | 119.05  | 181.10  | 163.09  | 164.07  | 82.54   | 68.54   | 91.05   |           |         |         |         |         |         |         |         |         | 36 |
| 2  | 70.07    | 261.12  | 243.11  | 244.10  | 233.13  | 215.12  | 216.10  | 278.15  | 260.14  | 261.12  | 131.06  | 117.06  | 139.58  | P         | 4133.01 | 4115.00 | 4115.98 | 4107.01 | 4089.02 | 4090.00 | 2067.00 | 2054.01 | 35 |
| 3  | 60.04    | 348.16  | 330.15  | 331.13  | 320.16  | 302.15  | 303.13  | 365.18  | 347.17  | 348.16  | 174.58  | 160.58  | 183.09  | S         | 4035.96 | 4017.95 | 4018.93 | 4009.97 | 3991.95 | 3992.95 | 2018.48 | 2005.49 | 34 |
| 4  | 101.11   | 476.25  | 458.24  | 459.22  | 448.26  | 430.25  | 431.23  | 493.28  | 475.27  | 476.25  | 238.63  | 224.63  | 247.14  | K         | 3948.92 | 3930.91 | 3931.90 | 3922.94 | 3904.93 | 3905.93 | 1974.96 | 1961.97 | 33 |
| 5  | 70.07    | 573.30  | 555.29  | 556.28  | 545.31  | 527.30  | 528.28  | 590.33  | 572.32  | 573.30  | 287.15  | 273.15  | 295.67  | P         | 3820.83 | 3802.82 | 3803.80 | 3794.84 | 3776.82 | 3777.83 | 1910.91 | 1897.92 | 32 |
| 6  | 88.04    | 688.33  | 670.32  | 671.30  | 660.34  | 642.33  | 643.31  | 705.36  | 687.35  | 688.33  | 344.67  | 330.67  | 353.18  | D         | 3723.78 | 3705.77 | 3706.75 | 3697.80 | 3679.79 | 3680.77 | 1862.39 | 1849.40 | 31 |
| 7  | 87.06    | 802.37  | 784.36  | 785.35  | 774.38  | 756.37  | 757.35  | 819.40  | 801.39  | 802.37  | 401.69  | 387.69  | 410.20  | N         | 3608.75 | 3590.74 | 3591.72 | 3582.76 | 3564.76 | 3565.75 | 1804.87 | 1791.88 | 30 |
| 8  | 70.07    | 899.43  | 881.42  | 882.40  | 871.43  | 853.42  | 854.40  | 916.45  | 898.44  | 899.43  | 450.21  | 436.22  | 458.73  | P         | 3494.71 | 3476.70 | 3477.68 | 3468.73 | 3450.72 | 3451.70 | 1747.85 | 1734.86 | 29 |
| 9  | 30.03    | 956.45  | 938.44  | 939.42  | 928.45  | 910.44  | 911.43  | 973.47  | 955.46  | 956.45  | 473.25  | 464.73  | 487.24  | G         | 3397.65 | 3379.64 | 3380.63 | 3371.67 | 3353.66 | 3354.65 | 1699.33 | 1686.34 | 28 |
| 10 | 102.06   | 1085.49 | 1067.48 | 1068.46 | 1057.50 | 1039.48 | 1040.47 | 1102.52 | 1084.51 | 1085.49 | 548.25  | 529.25  | 551.76  | E         | 3340.63 | 3322.62 | 3323.60 | 3314.65 | 3296.64 | 3297.63 | 1670.82 | 1657.83 | 27 |
| 11 | 88.04    | 1200.52 | 1182.51 | 1183.49 | 1172.52 | 1154.51 | 1155.50 | 1217.54 | 1199.53 | 1200.52 | 600.76  | 586.76  | 609.27  | D         | 3211.59 | 3193.58 | 3194.56 | 3185.61 | 3167.60 | 3168.58 | 1606.29 | 1593.31 | 26 |
| 12 | 44.05    | 1271.55 | 1253.54 | 1254.53 | 1243.56 | 1225.55 | 1226.53 | 1288.58 | 1270.57 | 1271.55 | 636.28  | 622.28  | 644.79  | A         | 3096.56 | 3078.55 | 3079.54 | 3070.58 | 3052.57 | 3053.56 | 1548.78 | 1535.79 | 25 |
| 13 | 70.07    | 1368.61 | 1350.60 | 1351.58 | 1340.61 | 1322.60 | 1323.59 | 1385.63 | 1367.62 | 1368.61 | 684.80  | 670.81  | 693.32  | P         | 3025.53 | 3007.51 | 3008.50 | 2999.55 | 2981.54 | 2982.52 | 1513.26 | 1500.27 | 24 |
| 14 | 44.05    | 1439.64 | 1421.63 | 1422.62 | 1411.65 | 1393.64 | 1394.62 | 1456.67 | 1438.66 | 1439.64 | 720.32  | 706.32  | 728.84  | A         | 2928.47 | 2910.46 | 2911.45 | 2902.49 | 2884.48 | 2885.47 | 1464.74 | 1451.75 | 23 |
| 15 | 102.06   | 1568.69 | 1550.68 | 1551.66 | 1540.69 | 1522.68 | 1523.66 | 1585.71 | 1567.70 | 1568.69 | 784.84  | 770.85  | 793.36  | E         | 2857.44 | 2839.42 | 2840.41 | 2831.46 | 2813.45 | 2814.43 | 1429.22 | 1416.23 | 22 |
| 16 | 88.04    | 1683.71 | 1665.70 | 1666.69 | 1655.72 | 1637.71 | 1638.69 | 1700.74 | 1682.73 | 1683.71 | 842.36  | 828.36  | 850.87  | D         | 2728.39 | 2710.38 | 2711.37 | 2702.41 | 2684.40 | 2685.39 | 1364.70 | 1351.71 | 21 |
| 17 | 104.05   | 1814.75 | 1796.74 | 1797.73 | 1786.76 | 1768.75 | 1769.73 | 1831.78 | 1813.77 | 1814.75 | 907.88  | 893.88  | 916.39  | M         | 2613.37 | 2595.36 | 2596.34 | 2587.38 | 2569.38 | 2570.35 | 1307.18 | 1294.19 | 20 |
| 18 | 44.05    | 1885.79 | 1867.78 | 1868.76 | 1857.80 | 1839.79 | 1840.77 | 1902.82 | 1884.81 | 1885.79 | 943.40  | 929.40  | 951.91  | A         | 2482.33 | 2464.31 | 2465.30 | 2456.35 | 2438.34 | 2439.32 | 1241.66 | 1228.67 | 19 |
| 19 | 129.11   | 2041.89 | 2023.88 | 2024.87 | 2013.90 | 1995.89 | 1996.87 | 2058.92 | 2040.91 | 2041.89 | 1021.45 | 1007.45 | 1029.96 | R         | 2411.29 | 2393.28 | 2394.26 | 2385.31 | 2367.30 | 2368.28 | 1206.14 | 1193.15 | 18 |
| 20 | 136.08   | 2204.96 | 2186.95 | 2187.93 | 2176.96 | 2158.95 | 2159.93 | 2221.98 | 2203.97 | 2204.96 | 1102.98 | 1088.98 | 1111.49 | Y         | 2255.19 | 2237.18 | 2238.16 | 2229.21 | 2211.20 | 2212.18 | 1128.09 | 1115.10 | 17 |
| 21 | 136.08   | 2368.02 | 2350.01 | 2350.99 | 2340.02 | 2322.01 | 2323.00 | 2385.05 | 2367.04 | 2368.02 | 1184.51 | 1170.51 | 1193.02 | Y         | 2092.12 | 2074.11 | 2075.10 | 2066.14 | 2048.13 | 2049.12 | 1046.56 | 1033.57 | 16 |
| 22 | 60.04    | 2455.05 | 2437.04 | 2438.02 | 2427.06 | 2409.05 | 2410.03 | 2472.08 | 2454.07 | 2455.05 | 1228.03 | 1214.03 | 1236.54 | S         | 1929.06 | 1911.05 | 1912.03 | 1903.08 | 1885.07 | 1886.05 | 965.03  | 952.04  | 15 |
| 23 | 44.05    | 2526.09 | 2508.08 | 2509.06 | 2498.09 | 2480.08 | 2481.07 | 2543.12 | 2525.10 | 2526.09 | 1263.54 | 1249.55 | 1272.06 | A         | 1842.03 | 1824.02 | 1825.00 | 1816.05 | 1798.04 | 1799.02 | 921.51  | 908.52  | 14 |
| 24 | 86.10    | 2639.17 | 2621.16 | 2622.15 | 2611.18 | 2593.17 | 2594.15 | 2656.20 | 2638.19 | 2639.17 | 1320.09 | 1306.09 | 1328.60 | L         | 1770.99 | 1752.98 | 1753.96 | 1745.01 | 1727.00 | 1727.99 | 886.00  | 873.01  | 13 |
| 25 | 129.11   | 2795.27 | 2777.26 | 2778.25 | 2767.28 | 2749.27 | 2750.25 | 2812.30 | 2794.29 | 2795.27 | 1398.14 | 1384.14 | 1406.65 | R         | 1657.91 | 1639.90 | 1640.88 | 1631.93 | 1613.92 | 1614.90 | 829.45  | 816.46  | 12 |
| 26 | 110.07   | 2932.33 | 2914.32 | 2915.31 | 2904.34 | 2886.33 | 2887.31 | 2949.36 | 2931.35 | 2932.33 | 1466.67 | 1452.67 | 1475.18 | H         | 1501.81 | 1483.80 | 1484.78 | 1475.83 | 1457.82 | 1458.80 | 751.40  | 738.41  | 11 |
| 27 | 136.08   | 3095.40 | 3077.39 | 3078.37 | 3067.40 | 3049.39 | 3050.37 | 3112.42 | 3094.41 | 3095.40 | 1548.20 | 1534.20 | 1556.71 | Y         | 1364.75 | 1346.74 | 1347.72 | 1338.77 | 1320.76 | 1321.74 | 682.87  | 669.88  | 10 |
| 28 | 86.10    | 3208.48 | 3190.47 | 3191.45 | 3180.48 | 3162.47 | 3163.46 | 3225.51 | 3207.50 | 3208.48 | 1604.74 | 1590.74 | 1613.25 | I         | 1201.68 | 1183.67 | 1184.66 | 1175.70 | 1157.69 | 1158.68 | 601.34  | 588.35  | 9  |
| 29 | 87.06    | 3322.52 | 3304.51 | 3305.50 | 3294.53 | 3276.52 | 3277.50 | 3339.55 | 3321.54 | 3322.52 | 1661.76 | 1647.76 | 1670.27 | N         | 1088.60 | 1070.59 | 1071.57 | 1062.62 | 1044.61 | 1045.59 | 544.80  | 531.81  | 8  |
| 30 | 86.10    | 3435.61 | 3417.60 | 3418.58 | 3407.61 | 3389.60 | 3390.58 | 3452.63 | 3434.62 | 3435.61 | 1718.30 | 1704.31 | 1726.82 | L         | 974.56  | 956.55  | 957.53  | 948.58  | 930.57  | 931.55  | 487.78  | 474.79  | 7  |
| 31 | 86.10    | 3548.69 | 3530.68 | 3531.66 | 3520.70 | 3502.69 | 3503.67 | 3565.75 | 3547.73 | 3548.69 | 1774.85 | 1760.85 | 1783.36 | I         | 861.47  | 843.46  | 844.45  | 835.49  | 817.48  | 818.47  | 431.24  | 418.25  | 6  |
| 32 | 74.06    | 3649.74 | 3631.73 | 3632.71 | 3621.74 | 3603.73 | 3604.72 | 3666.77 | 3648.76 | 3649.74 | 1825.37 | 1811.37 | 1833.88 | T         | 748.39  | 730.38  | 731.36  | 722.41  | 704.40  | 705.38  | 374.69  | 361.70  | 5  |
| 33 | 129.11   | 3805.84 | 3787.83 | 3788.81 | 3777.83 | 3759.81 | 3760.82 | 3822.87 | 3804.86 | 3805.84 | 1902.42 | 1889.42 | 1911.93 | R         | 647.34  | 629.33  | 630.31  | 621.36  | 603.35  | 604.33  | 324.17  | 311.18  | 4  |
| 34 | 101.07   | 3933.90 | 3915.89 | 3916.87 | 3905.93 | 3887.89 | 3888.88 | 3950.93 | 3932.91 | 3933.90 | 1967.45 | 1953.45 | 1975.96 | Q         | 491.24  | 473.23  | 474.21  | 465.26  | 447.25  | 448.23  | 246.12  | 233.13  | 3  |
| 35 | 129.11   | 4090.00 | 4071.99 | 4072.97 | 4062.00 | 4043.99 | 4044.98 | 4107.01 | 4089.02 | 4090.00 | 2045.50 | 2031.50 | 2054.01 | R         | 363.18  | 345.17  | 346.15  | 337.20  | 319.19  | 320.18  | 182.09  | 169.10  | 2  |
| 36 | 135.10   |         |         |         |         |         |         |         |         |         |         |         |         | (Y(-.98)) | 207.08  | 189.07  | 190.05  | 181.10  | 163.09  | 164.07  | 104.04  | 91.05   | 1  |

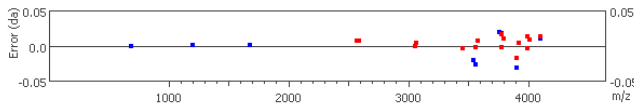

R.SLSAASAPLAETSTPLRL.R

m/z=892.9921

Z=2

Error=1ppm

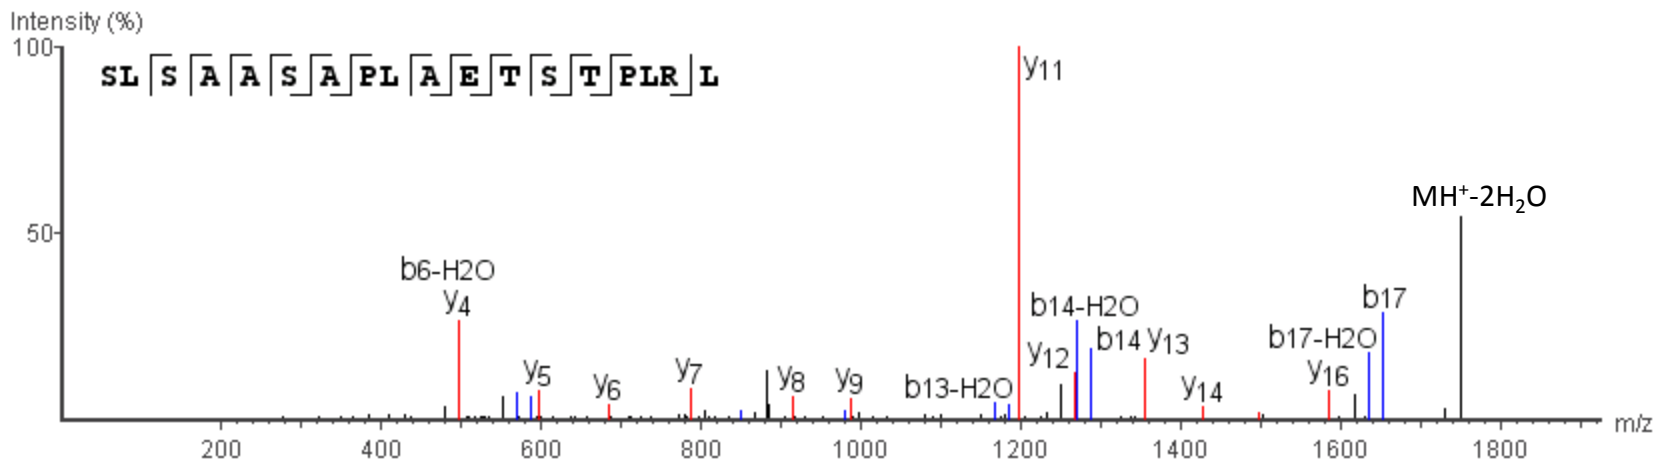

| #  | Immonium | b         | b-H2O     | b-NH3     | a         | a-H2O     | a-NH3     | c         | c-H2O     | c-NH3     | c-H       | b (2+)   | a (2+)   | c (2+)   | Seq | x         | x-H2O     | x-NH3     | y         | y-H2O     | y-NH3     | x (2+)   | y (2+)   | #  |
|----|----------|-----------|-----------|-----------|-----------|-----------|-----------|-----------|-----------|-----------|-----------|----------|----------|----------|-----|-----------|-----------|-----------|-----------|-----------|-----------|----------|----------|----|
| 1  | 60.0449  | 88.0399   | 70.0293   | 71.0129   | 60.0449   | 42.0343   | 43.0179   | 105.0669  | 87.0563   | 88.0399   | 104.0590  | 44.5199  | 30.5224  | 53.0334  | S   |           |           |           |           |           |           |          |          | 18 |
| 2  | 86.0969  | 201.1239  | 183.1134  | 184.0969  | 173.1289  | 155.1183  | 156.1019  | 218.1509  | 200.1404  | 201.1239  | 217.1431  | 101.0620 | 87.0645  | 109.5755 | L   | 1723.9225 | 1705.9119 | 1706.8955 | 1697.9431 | 1679.9326 | 1680.9161 | 862.4612 | 849.4716 | 17 |
| 3  | 60.0449  | 288.1559  | 270.1454  | 271.1290  | 260.1609  | 242.1504  | 243.1340  | 305.1830  | 287.1724  | 288.1559  | 304.1751  | 144.5780 | 130.5805 | 153.0915 | S   | 1610.8385 | 1592.8279 | 1593.8115 | 1584.8582 | 1566.8486 | 1567.8322 | 805.9193 | 792.9296 | 16 |
| 4  | 44.0499  | 359.1931  | 341.1825  | 342.1661  | 331.1981  | 313.1875  | 314.1711  | 376.2201  | 358.2095  | 359.1931  | 375.2122  | 180.0965 | 166.0990 | 188.6100 | A   | 1523.8064 | 1505.7958 | 1506.7794 | 1497.8337 | 1479.8165 | 1480.8000 | 762.4032 | 749.4135 | 15 |
| 5  | 44.0499  | 430.2302  | 412.2196  | 413.2032  | 402.2352  | 384.2246  | 385.2082  | 447.2572  | 429.2466  | 430.2302  | 446.2494  | 215.6151 | 201.6176 | 224.1286 | A   | 1452.7823 | 1434.7587 | 1435.7423 | 1426.7908 | 1408.7794 | 1409.7629 | 726.8846 | 713.8950 | 14 |
| 6  | 60.0449  | 517.2622  | 499.2521  | 500.2352  | 489.2672  | 471.2567  | 472.2402  | 534.2892  | 516.2787  | 517.2622  | 533.2814  | 259.1311 | 245.1336 | 267.6446 | S   | 1381.7322 | 1363.7216 | 1364.7052 | 1355.7504 | 1337.7423 | 1338.7258 | 691.3661 | 678.3764 | 13 |
| 7  | 44.0499  | 588.2988  | 570.2890  | 571.2723  | 560.3043  | 542.2938  | 543.2773  | 605.3264  | 587.3158  | 588.2988  | 604.3185  | 294.6497 | 280.6522 | 303.1632 | A   | 1294.7002 | 1276.6896 | 1277.6732 | 1268.7207 | 1250.7103 | 1251.6938 | 647.8501 | 634.8604 | 12 |
| 8  | 70.0656  | 685.3521  | 667.3415  | 668.3251  | 657.3571  | 639.3465  | 640.3301  | 702.3791  | 684.3685  | 685.3521  | 701.3712  | 343.1760 | 329.1785 | 351.6895 | P   | 1223.6631 | 1205.6525 | 1206.6361 | 1197.6836 | 1179.6732 | 1180.6567 | 612.3315 | 599.3419 | 11 |
| 9  | 86.0969  | 798.4361  | 780.4255  | 781.4091  | 770.4411  | 752.4305  | 753.4141  | 815.4631  | 797.4526  | 798.4361  | 814.4553  | 399.7180 | 385.7206 | 408.2316 | L   | 1126.6104 | 1108.5997 | 1109.5834 | 1100.6310 | 1082.6205 | 1083.6040 | 563.8052 | 550.8155 | 10 |
| 10 | 44.0499  | 869.4732  | 851.4603  | 852.4462  | 841.4782  | 823.4677  | 824.4512  | 886.5002  | 868.4897  | 869.4732  | 885.4924  | 435.2366 | 421.2391 | 443.7501 | A   | 1013.5262 | 995.5157  | 996.4993  | 987.5468  | 969.5363  | 970.5199  | 507.2631 | 494.2734 | 9  |
| 11 | 102.0554 | 998.5158  | 980.5043  | 981.4888  | 970.5208  | 952.5103  | 953.4938  | 1015.5428 | 997.5323  | 998.5158  | 1014.5350 | 499.7579 | 485.7604 | 508.2714 | E   | 942.4891  | 924.4786  | 925.4622  | 916.5093  | 898.4992  | 899.4828  | 471.7446 | 458.7549 | 8  |
| 12 | 74.0605  | 1099.5635 | 1081.5530 | 1082.5365 | 1071.5685 | 1053.5580 | 1054.5415 | 1116.5905 | 1098.5800 | 1099.5635 | 1115.5826 | 550.2817 | 536.2842 | 558.7952 | T   | 813.4466  | 795.4360  | 796.4196  | 787.4670  | 769.4567  | 770.4402  | 407.2233 | 394.2336 | 7  |
| 13 | 60.0449  | 1186.5929 | 1168.5861 | 1169.5695 | 1158.6005 | 1140.5900 | 1141.5735 | 1203.6224 | 1185.6119 | 1186.5929 | 1202.6146 | 593.7977 | 579.8002 | 602.3112 | S   | 712.3989  | 694.3883  | 695.3718  | 686.4197  | 668.4089  | 669.3925  | 356.6994 | 343.7097 | 6  |
| 14 | 74.0605  | 1287.6427 | 1269.6311 | 1270.6162 | 1259.6482 | 1241.6377 | 1242.6212 | 1304.6702 | 1286.6597 | 1287.6427 | 1303.6624 | 644.3216 | 630.3241 | 652.8351 | T   | 625.3669  | 607.3563  | 608.3398  | 599.3881  | 581.3770  | 582.3605  | 313.1834 | 300.1938 | 5  |
| 15 | 70.0656  | 1384.6959 | 1366.6854 | 1367.6689 | 1356.7009 | 1338.6904 | 1339.6740 | 1401.7229 | 1383.7124 | 1384.6959 | 1400.7151 | 692.8480 | 678.8505 | 701.3615 | P   | 524.3192  | 506.3086  | 507.2922  | 498.3400  | 480.3293  | 481.3128  | 262.6596 | 249.6699 | 4  |
| 16 | 86.0969  | 1497.7800 | 1479.7695 | 1480.7531 | 1469.7850 | 1451.7745 | 1452.7581 | 1514.8070 | 1496.7965 | 1497.7800 | 1513.7992 | 749.3900 | 735.3925 | 757.9035 | L   | 427.2664  | 409.2559  | 410.2394  | 401.2870  | 383.2765  | 384.2601  | 214.1332 | 201.1435 | 3  |
| 17 | 129.1139 | 1653.8809 | 1635.8704 | 1636.8541 | 1625.8861 | 1607.8756 | 1608.8591 | 1670.9081 | 1652.8976 | 1653.8809 | 1669.9003 | 827.4406 | 813.4431 | 835.9540 | R   | 314.1824  | 296.1718  | 297.1554  | 288.2030  | 270.1924  | 271.1760  | 157.5912 | 144.6015 | 2  |
| 18 | 86.0969  |           |           |           |           |           |           |           |           |           |           |          |          |          | L   | 158.0812  | 140.0707  | 141.0542  | 132.1019  | 114.0913  | 115.0749  | 79.5406  | 66.5509  | 1  |

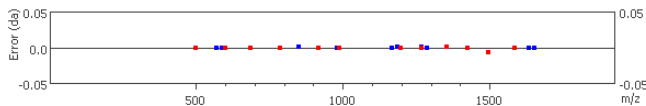

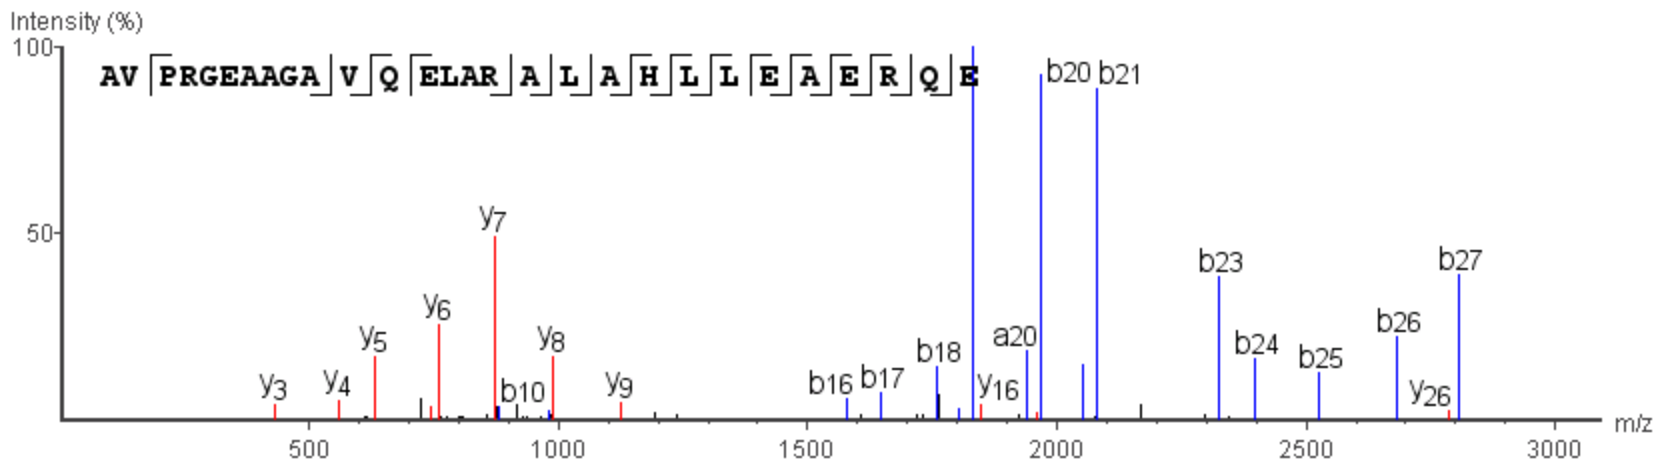

| #  | Immonium | b                | b+H2O     | b-NH3     | a                | a+H2O     | a-NH3     | c                | c+H2O     | c-NH3            | c-H       | b(2+)     | a(2+)     | c(2+)     | Seq | x         | x+H2O     | x-NH3     | y                | y+H2O           | y-NH3            | x(2+)     | y(2+)     | #  |
|----|----------|------------------|-----------|-----------|------------------|-----------|-----------|------------------|-----------|------------------|-----------|-----------|-----------|-----------|-----|-----------|-----------|-----------|------------------|-----------------|------------------|-----------|-----------|----|
| 1  | 44.0499  | 72.0449          | 54.0344   | 55.0179   | 44.0499          | 26.0394   | 27.0229   | 89.0719          | 71.0614   | 72.0449          | 88.0641   | 36.5225   | 22.5250   | 45.0360   | A   |           |           |           |                  |                 |                  |           |           | 28 |
| 2  | 72.0812  | 171.1134         | 153.1028  | 154.0863  | 143.1183         | 125.1078  | 126.0914  | 188.1404         | 170.1298  | 171.1134         | 187.1325  | 86.0567   | 72.0592   | 94.5702   | V   | 2910.5178 | 2892.5073 | 2893.4910 | 2884.5386        | 2866.5281       | 2867.5115        | 1455.7589 | 1442.7693 | 27 |
| 3  | 70.0656  | 268.1661         | 250.1555  | 251.1391  | 240.1711         | 222.1605  | 223.1441  | 285.1931         | 267.1825  | 268.1661         | 284.1853  | 134.5830  | 120.5855  | 143.0965  | P   | 2811.4495 | 2793.4390 | 2794.4226 | <b>2785.4661</b> | 2767.4597       | 2768.4431        | 1406.2247 | 1393.2351 | 26 |
| 4  | 129.1139 | 424.2672         | 406.2567  | 407.2402  | 396.2722         | 378.2617  | 379.2452  | 441.2942         | 423.2837  | 424.2672         | 440.2864  | 212.6336  | 198.6361  | 221.1471  | R   | 2714.3967 | 2696.3862 | 2697.3699 | 2688.4175        | 2670.4070       | 2671.3904        | 1357.6984 | 1344.7087 | 25 |
| 5  | 30.0343  | 481.2887         | 463.2781  | 464.2617  | 453.2937         | 435.2831  | 436.2667  | 498.3157         | 480.3051  | 481.2887         | 497.3079  | 241.1443  | 227.1468  | 249.6578  | G   | 2558.2957 | 2540.2852 | 2541.2688 | 2532.3164        | 2514.3059       | 2515.2893        | 1279.6478 | 1266.6582 | 24 |
| 6  | 102.0554 | 610.3312         | 592.3207  | 593.3043  | 582.3362         | 564.3257  | 565.3093  | 627.3583         | 609.3477  | 610.3312         | 626.3504  | 305.6656  | 291.6681  | 314.1791  | E   | 2501.2742 | 2483.2637 | 2484.2473 | 2475.2949        | 2457.2844       | 2458.2678        | 1251.1371 | 1238.1475 | 23 |
| 7  | 44.0499  | 681.3683         | 663.3578  | 664.3414  | 653.3734         | 635.3628  | 636.3464  | 698.3954         | 680.3848  | 681.3683         | 697.3875  | 341.1842  | 327.1867  | 349.6977  | A   | 2372.2317 | 2354.2212 | 2355.2048 | 2346.2524        | 2328.2419       | 2329.2253        | 1186.6158 | 1173.6262 | 22 |
| 8  | 44.0499  | 752.4055         | 734.3949  | 735.3785  | 724.4105         | 706.3999  | 707.3835  | 769.4325         | 751.4219  | 752.4055         | 768.4246  | 376.7027  | 362.7052  | 385.2162  | A   | 2301.1946 | 2283.1841 | 2284.1677 | 2275.2153        | 2257.2048       | 2258.1882        | 1151.5973 | 1138.1077 | 21 |
| 9  | 30.0343  | 809.4269         | 791.4164  | 792.4000  | 781.4319         | 763.4214  | 764.4050  | 826.4540         | 808.4434  | 809.4269         | 825.4461  | 405.2135  | 391.2160  | 413.7270  | G   | 2230.1575 | 2212.1470 | 2213.1306 | 2204.1782        | 2186.1677       | 2187.1511        | 1115.5787 | 1102.5891 | 20 |
| 10 | 44.0499  | <b>880.4645</b>  | 862.4535  | 863.4371  | 852.4691         | 834.4585  | 835.4421  | 897.4911         | 879.4805  | <b>880.4645</b>  | 896.4832  | 440.7320  | 426.7345  | 449.2454  | A   | 2173.1360 | 2155.1255 | 2156.1091 | 2147.1567        | 2129.1462       | 2130.1296        | 1087.0680 | 1074.0784 | 19 |
| 11 | 72.0812  | 979.5325         | 961.5219  | 962.5055  | 951.5375         | 933.5269  | 934.5105  | 996.5595         | 978.5490  | 979.5325         | 995.5516  | 490.2662  | 476.2687  | 498.7798  | V   | 2102.0989 | 2084.0884 | 2085.0720 | 2076.1196        | 2058.1091       | 2059.0925        | 1051.5494 | 1038.5598 | 18 |
| 12 | 101.0714 | 1107.5911        | 1089.5806 | 1090.5641 | 1079.5961        | 1061.5856 | 1062.5691 | <b>1124.5706</b> | 1106.6075 | 1107.5911        | 1123.6102 | 554.2955  | 540.2980  | 562.8090  | Q   | 2003.0305 | 1985.0199 | 1986.0035 | 1977.0511        | 1959.0406       | <b>1960.0271</b> | 1002.0153 | 989.0256  | 17 |
| 13 | 102.0554 | 1236.6337        | 1218.6232 | 1219.6067 | 1208.6387        | 1190.6282 | 1191.6117 | 1253.6606        | 1235.6501 | 1236.6337        | 1252.6528 | 618.8168  | 604.8193  | 627.3303  | E   | 1874.9719 | 1856.9613 | 1857.9449 | <b>1848.9929</b> | 1830.9821       | <b>1832.0149</b> | 937.9860  | 924.9963  | 16 |
| 14 | 86.0969  | 1349.7177        | 1331.7072 | 1332.6907 | 1321.7227        | 1303.7122 | 1304.6957 | 1366.7446        | 1348.7341 | 1349.7177        | 1365.7368 | 675.3588  | 661.3613  | 683.8723  | L   | 1745.9293 | 1727.9187 | 1728.9023 | <b>1719.9521</b> | 1701.9395       | 1702.9230        | 873.4647  | 860.4750  | 15 |
| 15 | 44.0499  | 1420.7548        | 1402.7443 | 1403.7278 | 1392.7598        | 1374.7493 | 1375.7328 | 1437.7817        | 1419.7712 | 1420.7548        | 1436.7739 | 710.8774  | 696.8799  | 719.3909  | A   | 1632.8453 | 1614.8347 | 1615.8184 | 1606.8660        | 1588.8555       | 1589.8390        | 816.9227  | 803.9330  | 14 |
| 16 | 129.1139 | <b>1576.8564</b> | 1558.8453 | 1559.8289 | 1548.8608        | 1530.8503 | 1531.8339 | 1593.8828        | 1575.8723 | <b>1576.8564</b> | 1592.8750 | 788.9279  | 774.9304  | 797.4414  | R   | 1561.8082 | 1543.7976 | 1544.7812 | 1535.8289        | 1517.8184       | 1518.8019        | 781.4041  | 768.4144  | 13 |
| 17 | 44.0499  | <b>1647.8938</b> | 1629.8824 | 1630.8660 | 1619.8979        | 1601.8875 | 1602.8710 | 1664.9199        | 1646.9094 | <b>1647.8938</b> | 1663.9121 | 824.4465  | 810.4490  | 832.9600  | A   | 1405.7070 | 1387.6964 | 1388.6801 | 1379.7277        | 1361.7172       | 1362.7007        | 703.3535  | 690.3638  | 12 |
| 18 | 86.0969  | <b>1760.9738</b> | 1742.9666 | 1743.9501 | 1732.9821        | 1714.9716 | 1715.9551 | 1778.0040        | 1759.9935 | <b>1760.9738</b> | 1776.9962 | 880.9885  | 866.9910  | 889.5020  | L   | 1334.6699 | 1316.6593 | 1317.6429 | 1308.6906        | 1290.6801       | 1291.6636        | 667.8350  | 654.8453  | 11 |
| 19 | 44.0499  | <b>1832.0149</b> | 1814.0037 | 1814.9872 | <b>1804.0201</b> | 1786.0087 | 1786.9922 | <b>1848.9929</b> | 1831.0006 | <b>1832.0149</b> | 1848.0333 | 916.5071  | 902.5096  | 925.0206  | A   | 1221.5889 | 1203.5783 | 1204.5590 | 1195.6066        | 1177.5961       | 1178.5796        | 611.2930  | 598.3033  | 10 |
| 20 | 110.0717 | <b>1969.0734</b> | 1951.0626 | 1952.0461 | <b>1941.0780</b> | 1923.0676 | 1924.0511 | 1986.1001        | 1968.0896 | <b>1969.0734</b> | 1985.0923 | 985.0636  | 971.0391  | 993.5500  | H   | 1150.5488 | 1132.5382 | 1133.5219 | <b>1124.5706</b> | 1106.5590       | 1107.5425        | 575.7744  | 562.7847  | 9  |
| 21 | 86.0969  | <b>2082.1572</b> | 2064.1467 | 2065.1301 | <b>2054.1628</b> | 2036.1517 | 2037.1353 | 2099.1843        | 2081.1736 | <b>2082.1572</b> | 2098.1765 | 1041.5786 | 1027.5812 | 1050.0922 | L   | 1013.4899 | 995.4793  | 996.4629  | <b>987.5107</b>  | 969.4999        | 970.4835         | 507.2449  | 494.2552  | 8  |
| 22 | 86.0969  | 2195.2412        | 2177.2307 | 2178.2141 | <b>2167.2556</b> | 2149.2356 | 2150.2192 | 2212.2683        | 2194.2576 | 2195.2412        | 2211.2605 | 1098.1206 | 1084.1232 | 1106.6342 | L   | 900.4058  | 882.3953  | 883.3788  | <b>874.4272</b>  | 856.4159        | 857.3995         | 450.7029  | 437.7132  | 7  |
| 23 | 102.0554 | <b>2324.2844</b> | 2306.2732 | 2307.2566 | 2296.2888        | 2278.2781 | 2279.2617 | 2341.3108        | 2323.3000 | <b>2324.2844</b> | 2340.3030 | 1162.6418 | 1148.6444 | 1171.1554 | E   | 787.3218  | 769.3112  | 770.2948  | <b>761.3439</b>  | <b>743.3326</b> | 744.3154         | 394.1609  | 381.1712  | 6  |
| 24 | 44.0499  | <b>2395.3218</b> | 2377.3103 | 2378.2937 | 2367.3259        | 2349.3152 | 2350.2988 | 2412.3479        | 2394.3372 | <b>2395.3218</b> | 2411.3401 | 1198.1604 | 1184.1630 | 1206.6740 | A   | 658.2792  | 640.2686  | 641.2522  | <b>632.3005</b>  | 614.2892        | 615.2728         | 329.6396  | 316.6499  | 5  |
| 25 | 102.0554 | <b>2524.3652</b> | 2506.3530 | 2507.3364 | 2496.3687        | 2478.3579 | 2479.3415 | 2541.3906        | 2523.3799 | <b>2524.3652</b> | 2540.3828 | 1262.6818 | 1248.6843 | 1271.1953 | E   | 587.2421  | 569.2315  | 570.2151  | <b>561.2633</b>  | 543.2521        | 544.2357         | 294.1210  | 281.1313  | 4  |
| 26 | 129.1139 | <b>2650.4648</b> | 2632.4541 | 2633.4375 | 2622.4697        | 2604.4590 | 2605.4426 | 2697.4917        | 2679.4810 | <b>2680.4648</b> | 2696.4839 | 1340.7323 | 1326.7349 | 1349.2458 | R   | 458.1995  | 440.1889  | 441.1725  | <b>432.2207</b>  | 414.2095        | 415.1931         | 229.5997  | 216.6100  | 3  |
| 27 | 101.0714 | <b>2808.5239</b> | 2790.5127 | 2791.4961 | 2780.5283        | 2762.5176 | 2763.5012 | 2825.5503        | 2807.5396 | <b>2808.5239</b> | 2824.5425 | 1404.7616 | 1390.7642 | 1413.2751 | Q   | 302.0984  | 284.0878  | 285.0714  | 276.1190         | 258.1084        | 259.0920         | 151.5492  | 138.5595  | 2  |
| 28 | 102.0554 |                  |           |           |                  |           |           |                  |           |                  |           |           |           |           | E   | 174.0398  | 156.0292  | 157.0128  | 148.0604         | 130.0499        | 131.0334         | 87.5199   | 74.5302   | 1  |

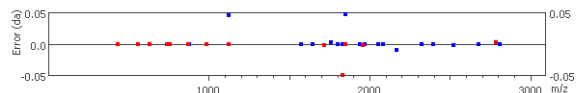

S.ARPVKEP.R

m/z=398.7381

Error=1.8ppm

Z=2

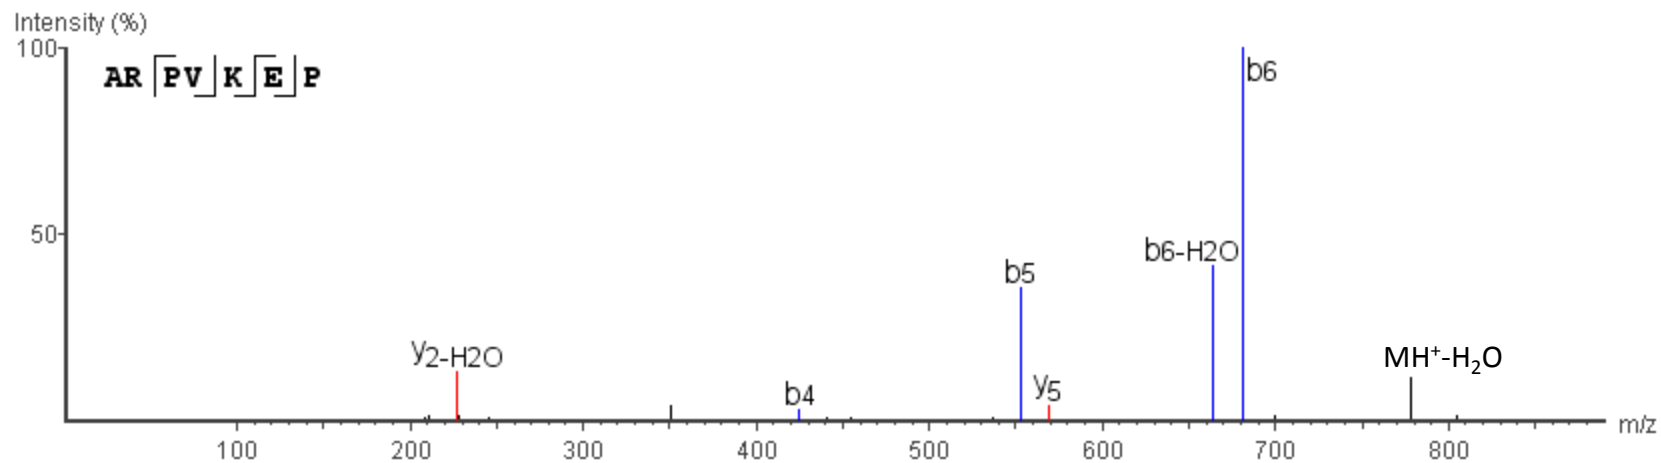

| # | Immonium | b        | b-H2O    | b-NH3    | a        | a-H2O    | a-NH3    | c        | c-H2O    | c-NH3    | c-H      | b (2+)   | a (2+)   | c (2+)   | Seq | x        | x-H2O    | x-NH3    | y        | y-H2O    | y-NH3    | x (2+)   | y (2+)   | # |  |   |
|---|----------|----------|----------|----------|----------|----------|----------|----------|----------|----------|----------|----------|----------|----------|-----|----------|----------|----------|----------|----------|----------|----------|----------|---|--|---|
| 1 | 44.0499  | 72.0449  | 54.0344  | 55.0179  | 44.0499  | 26.0394  | 27.0229  | 89.0719  | 71.0614  | 72.0449  | 88.0641  | 36.5225  | 22.5250  | 45.0360  | A   |          |          |          |          |          |          |          |          |   |  | 7 |
| 2 | 129.1139 | 228.1460 | 210.1355 | 211.1190 | 200.1510 | 182.1405 | 183.1240 | 245.1730 | 227.1625 | 228.1460 | 244.1652 | 114.5730 | 100.5755 | 123.0865 | R   | 751.4098 | 733.3992 | 734.3828 | 725.4304 | 707.4199 | 708.4034 | 376.2049 | 363.2152 | 6 |  |   |
| 3 | 70.0656  | 325.1988 | 307.1882 | 308.1718 | 297.2038 | 279.1932 | 280.1768 | 342.2258 | 324.2152 | 325.1988 | 341.2180 | 163.0994 | 149.1019 | 171.6129 | P   | 595.3087 | 577.2981 | 578.2816 | 569.3297 | 551.3187 | 552.3023 | 298.1543 | 285.1646 | 5 |  |   |
| 4 | 72.0812  | 424.2668 | 406.2567 | 407.2402 | 396.2722 | 378.2617 | 379.2452 | 441.2942 | 423.2837 | 424.2668 | 440.2864 | 212.6336 | 198.6361 | 221.1471 | V   | 498.2559 | 480.2454 | 481.2289 | 472.2766 | 454.2660 | 455.2496 | 249.6280 | 236.6383 | 4 |  |   |
| 5 | 101.1078 | 552.3616 | 534.3516 | 535.3352 | 524.3672 | 506.3566 | 507.3402 | 569.3892 | 551.3787 | 552.3616 | 568.3813 | 276.6811 | 262.6836 | 285.1946 | K   | 399.1875 | 381.1769 | 382.1605 | 373.2081 | 355.1976 | 356.1812 | 200.0938 | 187.1041 | 3 |  |   |
| 6 | 102.0554 | 681.4047 | 663.3940 | 664.3777 | 653.4097 | 635.3992 | 636.3828 | 698.4318 | 680.4212 | 681.4047 | 697.4239 | 341.2024 | 327.2049 | 349.7159 | E   | 271.0925 | 253.0820 | 254.0655 | 245.1132 | 227.1027 | 228.0862 | 136.0463 | 123.0566 | 2 |  |   |
| 7 | 70.0656  |          |          |          |          |          |          |          |          |          |          |          |          |          | P   | 142.0499 | 124.0394 | 125.0229 | 116.0707 | 98.0600  | 99.0436  | 71.5250  | 58.5353  | 1 |  |   |

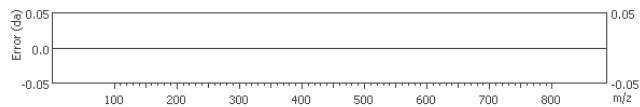



R.HKTDSFVGLM(-.98)

m/z=567.2918

Error=-0.8ppm

Z=2

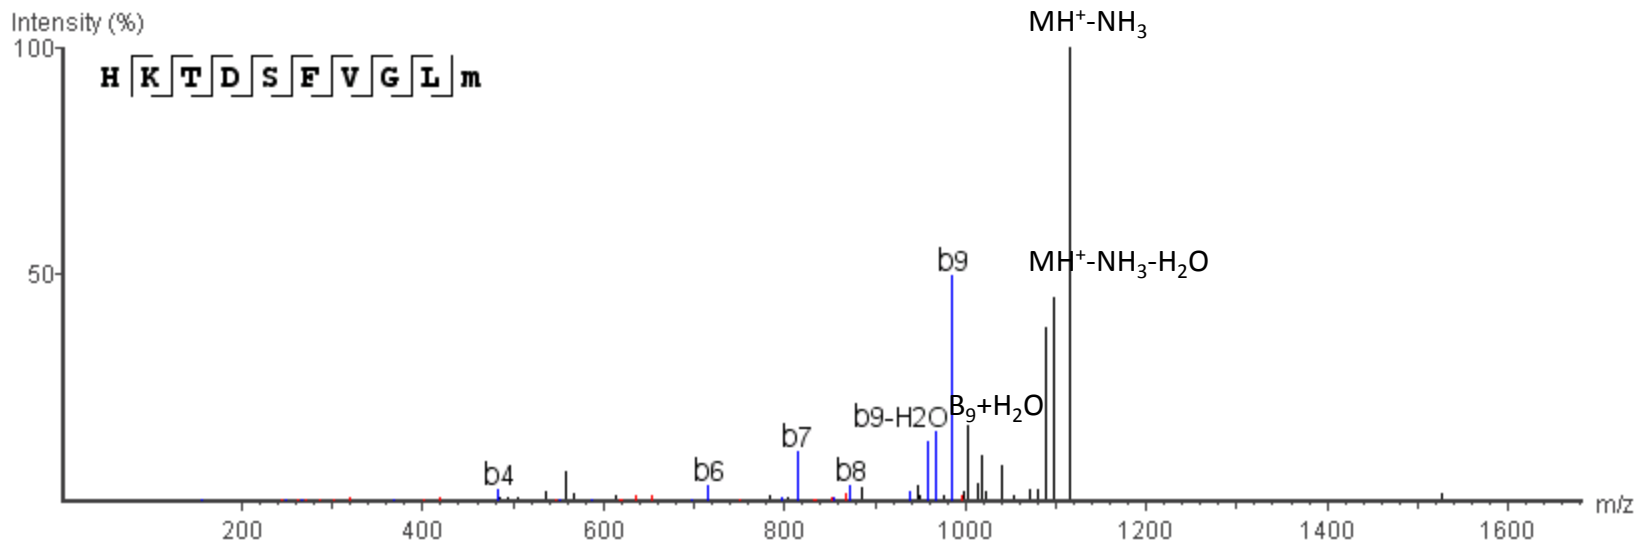

| #  | Immonium | b        | b-H2O    | b-NH3    | a        | a-H2O    | a-NH3    | c         | c-H2O    | c-NH3    | c-H       | b(2+)    | a(2+)    | c(2+)    | Seq     | x         | x-H2O     | x-NH3     | y        | y-H2O    | y-NH3    | x(2+)    | y(2+)    | # |  |    |
|----|----------|----------|----------|----------|----------|----------|----------|-----------|----------|----------|-----------|----------|----------|----------|---------|-----------|-----------|-----------|----------|----------|----------|----------|----------|---|--|----|
| 1  | 110.0717 | 138.0667 | 120.0562 | 121.0397 | 110.0717 | 92.0612  | 93.0447  | 155.0937  | 137.0832 | 138.0667 | 154.0859  | 69.5334  | 55.5359  | 78.0469  | H       |           |           |           |          |          |          |          |          |   |  | 10 |
| 2  | 101.1078 | 266.1617 | 248.1511 | 249.1347 | 238.1667 | 220.1561 | 221.1397 | 283.1887  | 265.1781 | 266.1617 | 282.1809  | 133.5808 | 119.5833 | 142.0943 | K       | 1022.5016 | 1004.4911 | 1005.4746 | 996.5223 | 978.5117 | 979.4953 | 511.7509 | 498.7611 | 9 |  |    |
| 3  | 74.0605  | 367.2094 | 349.1988 | 350.1824 | 339.2144 | 321.2038 | 322.1874 | 384.2364  | 366.2258 | 367.2094 | 383.2285  | 184.1047 | 170.1072 | 192.6182 | T       | 894.4067  | 876.3961  | 877.3796  | 868.4273 | 850.4167 | 851.4003 | 447.7033 | 434.7137 | 8 |  |    |
| 4  | 88.0398  | 482.2358 | 464.2257 | 465.2093 | 454.2413 | 436.2307 | 437.2143 | 499.2633  | 481.2527 | 482.2358 | 498.2555  | 241.6181 | 227.6207 | 250.1317 | D       | 793.3590  | 775.3484  | 776.3320  | 767.3796 | 749.3691 | 750.3527 | 397.1795 | 384.1898 | 7 |  |    |
| 5  | 60.0449  | 569.2683 | 551.2578 | 552.2413 | 541.2733 | 523.2628 | 524.2463 | 586.2953  | 568.2848 | 569.2683 | 585.2875  | 285.1342 | 271.1367 | 293.6477 | S       | 678.3320  | 660.3215  | 661.3051  | 652.3527 | 634.3421 | 635.3257 | 339.6660 | 326.6763 | 6 |  |    |
| 6  | 120.0812 | 716.3371 | 698.3262 | 699.3098 | 688.3417 | 670.3312 | 671.3148 | 733.3638  | 715.3532 | 716.3371 | 732.3559  | 358.6684 | 344.6709 | 367.1819 | F       | 591.3000  | 573.2895  | 574.2731  | 565.3207 | 547.3101 | 548.2937 | 296.1500 | 283.1603 | 5 |  |    |
| 7  | 72.0812  | 815.4038 | 797.3946 | 798.3782 | 787.4102 | 769.3996 | 770.3832 | 832.4322  | 814.4216 | 815.4038 | 831.4243  | 408.2026 | 394.2051 | 416.7161 | V       | 444.2316  | 426.2211  | 427.2046  | 418.2523 | 400.2417 | 401.2253 | 222.6158 | 209.6261 | 4 |  |    |
| 8  | 30.0343  | 872.4254 | 854.4161 | 855.3997 | 844.4316 | 826.4211 | 827.4047 | 889.4537  | 871.4431 | 872.4254 | 888.4458  | 436.7133 | 422.7158 | 445.2268 | G       | 345.1632  | 327.1526  | 328.1362  | 319.1838 | 301.1733 | 302.1569 | 173.0816 | 160.0919 | 3 |  |    |
| 9  | 86.0969  | 985.5088 | 967.5007 | 968.4837 | 957.5145 | 939.5051 | 940.4887 | 1002.5377 | 984.5272 | 985.5088 | 1001.5298 | 493.2553 | 479.2578 | 501.7689 | L       | 288.1418  | 270.1312  | 271.1147  | 262.1624 | 244.1518 | 245.1354 | 144.5709 | 131.5812 | 2 |  |    |
| 10 | 103.0733 |          |          |          |          |          |          |           |          |          |           |          |          |          | M(-.98) | 175.0577  | 157.0471  | 158.0307  | 149.0783 | 131.0678 | 132.0513 | 88.0288  | 75.0392  | 1 |  |    |

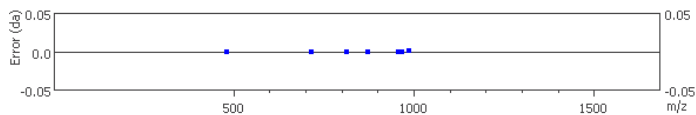

R.RPKPQQFFGLM(-.98).G

m/z=674.3698

Error=-2.4ppm

Z=2

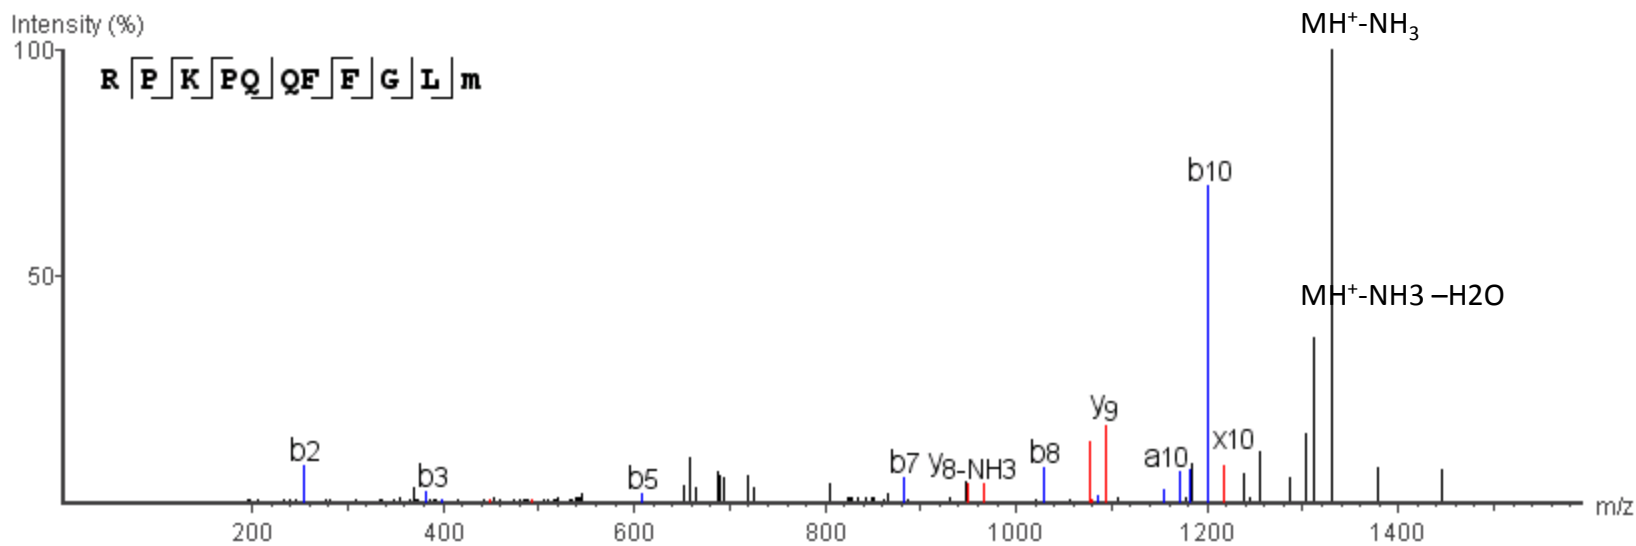

| #  | Immonium | b                | b-H2O            | b-NH3     | a                | a-H2O     | a-NH3            | c         | c-H2O     | c-NH3            | c-H       | b (2+)   | a (2+)   | c (2+)   | Seq     | x                | x-H2O     | x-NH3     | y                | y-H2O     | y-NH3            | x (2+)   | y (2+)   | #  |    |
|----|----------|------------------|------------------|-----------|------------------|-----------|------------------|-----------|-----------|------------------|-----------|----------|----------|----------|---------|------------------|-----------|-----------|------------------|-----------|------------------|----------|----------|----|----|
| 1  | 129.1139 | 157.1089         | 139.0984         | 140.0819  | 129.1139         | 111.1034  | 112.0869         | 174.1359  | 156.1254  | 157.1089         | 173.1281  | 79.0545  | 65.0570  | 87.5680  | R       |                  |           |           |                  |           |                  |          |          |    | 11 |
| 2  | 70.0656  | <b>254.1612</b>  | 236.1511         | 237.1347  | 226.1667         | 208.1561  | 209.1397         | 271.1887  | 253.1781  | <b>254.1612</b>  | 270.1809  | 127.5808 | 113.5833 | 136.0943 | P       | <b>1217.6237</b> | 1199.6071 | 1200.5907 | 1191.6383        | 1173.6278 | 1174.6113        | 609.3088 | 596.3192 | 10 |    |
| 3  | 101.1078 | <b>382.2561</b>  | 364.2461         | 365.2296  | 354.2616         | 336.2511  | 337.2346         | 399.2836  | 381.2731  | <b>382.2561</b>  | 398.2758  | 191.6283 | 177.6308 | 200.1418 | K       | 1120.5649        | 1102.5543 | 1103.5380 | <b>1094.5817</b> | 1076.5751 | <b>1077.5537</b> | 560.7825 | 547.7928 | 9  |    |
| 4  | 70.0656  | 479.3094         | 461.2988         | 462.2824  | 451.3144         | 433.3038  | 434.2874         | 496.3364  | 478.3258  | 479.3094         | 495.3286  | 240.1547 | 226.1572 | 248.6682 | P       | 992.4700         | 974.4594  | 975.4430  | <b>966.4849</b>  | 948.4800  | <b>949.4600</b>  | 496.7350 | 483.7453 | 8  |    |
| 5  | 101.0714 | 607.3680         | 589.3574         | 590.3410  | 579.3730         | 561.3624  | 562.3460         | 624.3950  | 606.3845  | 607.3680         | 623.3871  | 304.1840 | 290.1865 | 312.6975 | Q       | 895.4172         | 877.4066  | 878.3901  | 869.4378         | 851.4272  | 852.4108         | 448.2086 | 435.2189 | 7  |    |
| 6  | 101.0714 | 735.4265         | 717.4160         | 718.3995  | 707.4315         | 689.4210  | 690.4045         | 752.4536  | 734.4430  | 735.4265         | 751.4457  | 368.2133 | 354.2158 | 376.7268 | Q       | 767.3586         | 749.3480  | 750.3315  | 741.3792         | 723.3687  | 724.3522         | 384.1793 | 371.1896 | 6  |    |
| 7  | 120.0812 | <b>882.4943</b>  | 864.4844         | 865.4680  | 854.4999         | 836.4894  | 837.4730         | 899.5220  | 881.5114  | <b>882.4943</b>  | 898.5141  | 441.7475 | 427.7500 | 450.2610 | F       | 639.3000         | 621.2895  | 622.2731  | 613.3207         | 595.3101  | 596.2937         | 320.1500 | 307.1603 | 5  |    |
| 8  | 120.0812 | <b>1029.5656</b> | 1011.5528        | 1012.5364 | 1001.5684        | 983.5578  | 984.5414         | 1046.5903 | 1028.5798 | <b>1029.5656</b> | 1045.5825 | 515.2817 | 501.2842 | 523.7952 | F       | 492.2316         | 474.2211  | 475.2046  | 466.2523         | 448.2417  | 449.2253         | 246.6158 | 233.6261 | 4  |    |
| 9  | 30.0343  | 1086.5848        | 1068.5743        | 1069.5579 | 1058.5898        | 1040.5793 | 1041.5629        | 1103.6118 | 1085.6013 | 1086.5848        | 1102.6040 | 543.7924 | 529.7949 | 552.3059 | G       | 345.1632         | 327.1526  | 328.1362  | 319.1838         | 301.1733  | 302.1569         | 173.0816 | 160.0919 | 3  |    |
| 10 | 86.0969  | <b>1199.6683</b> | <b>1181.6558</b> | 1182.6418 | <b>1171.6711</b> | 1153.6633 | <b>1154.6478</b> | 1216.6958 | 1198.6853 | <b>1199.6683</b> | 1215.6880 | 600.3344 | 586.3369 | 608.8479 | L       | 288.1418         | 270.1312  | 271.1147  | 262.1624         | 244.1518  | 245.1354         | 144.5709 | 131.5812 | 2  |    |
| 11 | 103.0733 |                  |                  |           |                  |           |                  |           |           |                  |           |          |          |          | M(-.98) | 175.0577         | 157.0471  | 158.0307  | 149.0783         | 131.0678  | 132.0513         | 88.0288  | 75.0392  | 1  |    |

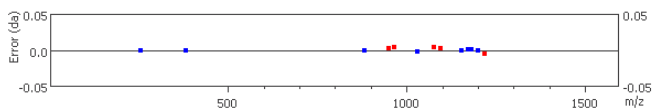

R.ALNSVAYERSAMQNYE.R

m/z=923.425

Error=-0.5ppm

Z=2

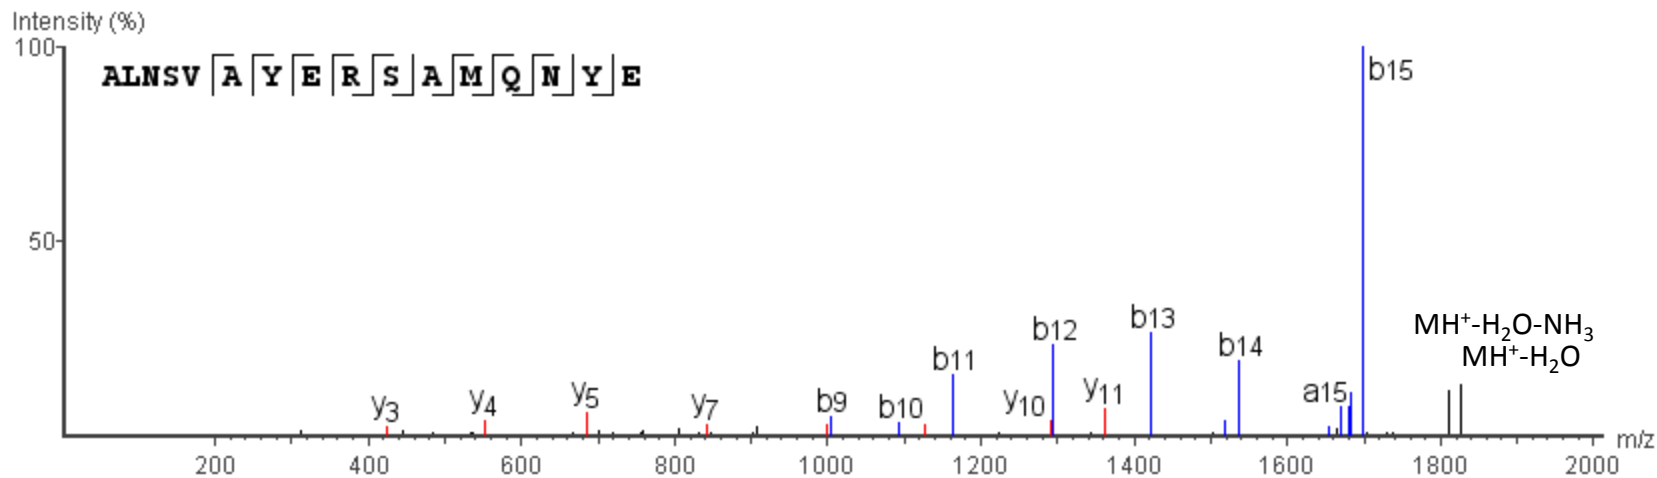

| #  | Immonium | b         | b-H2O     | b-NH3     | a         | a-H2O     | a-NH3     | c         | c-H2O     | c-NH3     | c-H       | b(2+)    | a(2+)    | c(2+)    | Seq | x         | x-H2O     | x-NH3     | y         | y-H2O     | y-NH3     | x(2+)    | y(2+)    | #  |    |
|----|----------|-----------|-----------|-----------|-----------|-----------|-----------|-----------|-----------|-----------|-----------|----------|----------|----------|-----|-----------|-----------|-----------|-----------|-----------|-----------|----------|----------|----|----|
| 1  | 44.0499  | 72.0449   | 54.0344   | 55.0179   | 44.0499   | 26.0394   | 27.0229   | 89.0719   | 71.0614   | 72.0449   | 88.0641   | 36.5225  | 22.5250  | 45.0360  | A   |           |           |           |           |           |           |          |          |    | 16 |
| 2  | 86.0969  | 185.1290  | 167.1184  | 168.1020  | 157.1340  | 139.1234  | 140.1070  | 202.1560  | 184.1454  | 185.1290  | 201.1482  | 93.0645  | 79.0670  | 101.5780 | L   | 1800.7858 | 1782.7751 | 1783.7588 | 1774.8064 | 1756.7959 | 1757.7794 | 900.8929 | 887.9032 | 15 |    |
| 3  | 87.0558  | 299.1719  | 281.1613  | 282.1449  | 271.1769  | 253.1664  | 254.1499  | 316.1989  | 298.1884  | 299.1719  | 315.1911  | 150.0860 | 136.0885 | 158.5995 | N   | 1687.7018 | 1669.6912 | 1670.6748 | 1661.7224 | 1643.7119 | 1644.6954 | 844.3509 | 831.3612 | 14 |    |
| 4  | 60.0449  | 386.2039  | 368.1934  | 369.1770  | 358.2090  | 340.1984  | 341.1819  | 403.2310  | 385.2204  | 386.2039  | 402.2231  | 193.6020 | 179.6045 | 202.1155 | S   | 1573.6588 | 1555.6482 | 1556.6318 | 1547.6794 | 1529.6689 | 1530.6525 | 787.3294 | 774.3397 | 13 |    |
| 5  | 72.0812  | 485.2723  | 467.2618  | 468.2454  | 457.2773  | 439.2668  | 440.2504  | 502.2993  | 484.2888  | 485.2723  | 501.2915  | 243.1362 | 229.1387 | 251.6497 | V   | 1496.6268 | 1468.6162 | 1469.5999 | 1460.6475 | 1442.6370 | 1443.6205 | 743.8134 | 730.8237 | 12 |    |
| 6  | 44.0499  | 556.3094  | 538.2989  | 539.2825  | 528.3145  | 510.3039  | 511.2875  | 573.3365  | 555.3259  | 556.3094  | 572.3286  | 278.6547 | 264.6572 | 287.1682 | A   | 1387.5583 | 1369.5477 | 1370.5314 | 1361.5735 | 1343.5685 | 1344.5520 | 694.2792 | 681.2895 | 11 |    |
| 7  | 136.0761 | 719.3728  | 701.3622  | 702.3458  | 691.3778  | 673.3672  | 674.3508  | 736.3998  | 718.3893  | 719.3728  | 735.3920  | 360.1864 | 346.1889 | 368.6999 | Y   | 1316.5212 | 1298.5106 | 1299.4943 | 1290.5349 | 1272.5314 | 1273.5149 | 658.7606 | 645.7709 | 10 |    |
| 8  | 102.0554 | 848.4154  | 830.4048  | 831.3884  | 820.4204  | 802.4099  | 803.3934  | 865.4424  | 847.4319  | 848.4154  | 864.4346  | 424.7077 | 410.7102 | 433.2212 | E   | 1153.4579 | 1135.4473 | 1136.4309 | 1127.4739 | 1109.4680 | 1110.4515 | 577.2289 | 564.2393 | 9  |    |
| 9  | 129.1139 | 1004.5100 | 986.5059  | 987.4895  | 976.5215  | 958.5109  | 959.4945  | 1021.5435 | 1003.5330 | 1004.5100 | 1020.5356 | 502.7582 | 488.7607 | 511.2718 | R   | 1024.4153 | 1006.4048 | 1007.3883 | 998.4315  | 980.4254  | 981.4090  | 512.7076 | 499.7180 | 8  |    |
| 10 | 60.0449  | 1091.5427 | 1073.5380 | 1074.5215 | 1063.5535 | 1045.5430 | 1046.5265 | 1108.5754 | 1090.5649 | 1091.5427 | 1107.5676 | 546.2742 | 532.2767 | 554.7877 | S   | 868.3143  | 850.3037  | 851.2872  | 842.3315  | 824.3243  | 825.3079  | 434.6571 | 421.6674 | 7  |    |
| 11 | 44.0499  | 1162.5793 | 1144.5751 | 1145.5586 | 1134.5906 | 1116.5801 | 1117.5636 | 1179.6125 | 1161.6021 | 1162.5793 | 1178.6047 | 581.7928 | 567.7953 | 590.3063 | A   | 781.2822  | 763.2717  | 764.2552  | 755.3029  | 737.2923  | 738.2759  | 391.1411 | 378.1514 | 6  |    |
| 12 | 104.0533 | 1293.6193 | 1275.6156 | 1276.5991 | 1265.6311 | 1247.6206 | 1248.6041 | 1310.6531 | 1292.6426 | 1293.6193 | 1309.6453 | 647.3130 | 633.3156 | 655.8265 | M   | 710.2451  | 692.2346  | 693.2181  | 684.2629  | 666.2552  | 667.2388  | 355.6226 | 342.6329 | 5  |    |
| 13 | 101.0714 | 1421.6770 | 1403.6742 | 1404.6577 | 1393.6897 | 1375.6792 | 1376.6627 | 1438.7117 | 1420.7012 | 1421.6770 | 1437.7039 | 711.3423 | 697.3448 | 719.8558 | Q   | 579.2046  | 561.1940  | 562.1776  | 553.2225  | 535.2147  | 536.1982  | 290.1023 | 277.1126 | 4  |    |
| 14 | 87.0558  | 1535.7195 | 1517.7172 | 1518.6973 | 1507.7327 | 1489.7222 | 1490.7057 | 1552.7546 | 1534.7441 | 1535.7195 | 1551.7468 | 768.3638 | 754.3663 | 776.8773 | N   | 451.1460  | 433.1355  | 434.1190  | 425.1648  | 407.1561  | 408.1397  | 226.0730 | 213.0833 | 3  |    |
| 15 | 136.0761 | 1698.7816 | 1680.7731 | 1681.7561 | 1670.7869 | 1652.7854 | 1653.7651 | 1715.8179 | 1697.8074 | 1698.7816 | 1714.8101 | 849.8954 | 835.8979 | 858.4089 | Y   | 337.1031  | 319.0925  | 320.0761  | 311.1237  | 293.1132  | 294.0967  | 169.0515 | 156.0619 | 2  |    |
| 16 | 102.0554 |           |           |           |           |           |           |           |           |           |           |          |          |          | E   | 174.0398  | 156.0292  | 157.0128  | 148.0604  | 130.0499  | 131.0334  | 87.5199  | 74.5302  | 1  |    |

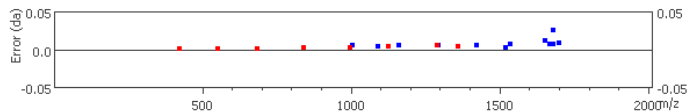

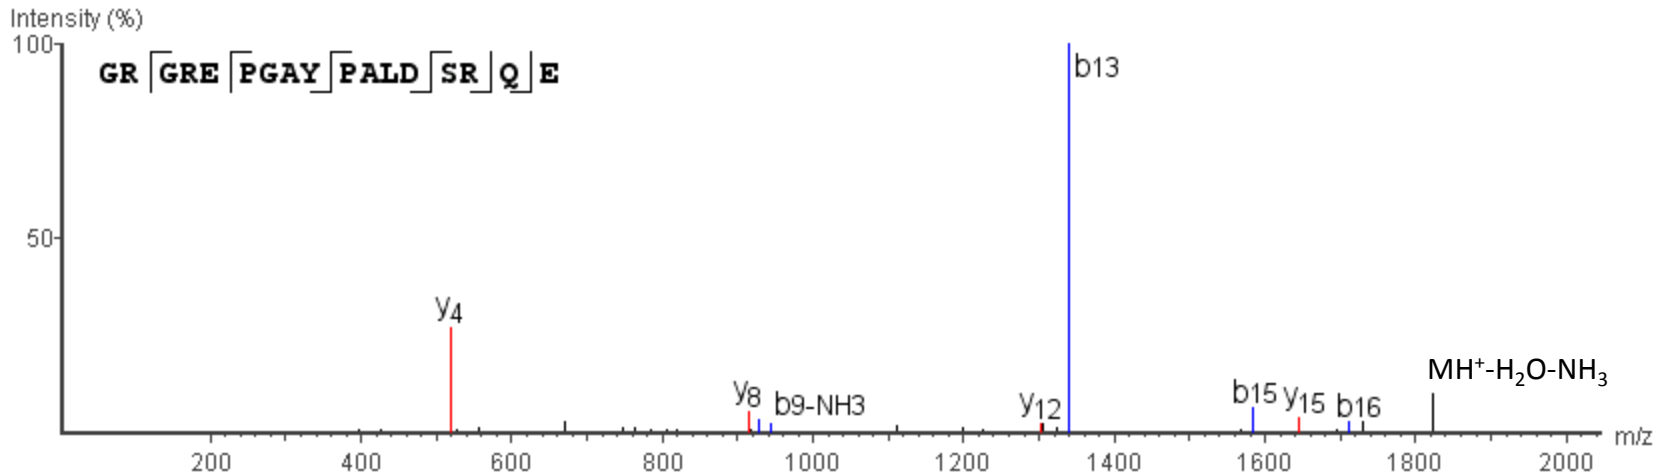

| #  | Immonium | b         | b-H2O     | b-NH3     | a         | a-H2O     | a-NH3     | c         | c-H2O     | c-NH3     | c-H       | b(2+)    | a(2+)    | c(2+)    | Seq | x         | x-H2O     | x-NH3     | y         | y-H2O     | y-NH3     | x(2+)    | y(2+)    | #  |
|----|----------|-----------|-----------|-----------|-----------|-----------|-----------|-----------|-----------|-----------|-----------|----------|----------|----------|-----|-----------|-----------|-----------|-----------|-----------|-----------|----------|----------|----|
| 1  | 30.0343  | 58.0293   | 40.0187   | 41.0023   | 30.0343   | 12.0237   | 13.0073   | 75.0563   | 57.0457   | 58.0293   | 74.0485   | 29.5146  | 15.5171  | 38.0281  | G   |           |           |           |           |           |           |          |          | 17 |
| 2  | 129.1139 | 214.1304  | 196.1198  | 197.1034  | 186.1354  | 168.1248  | 169.1084  | 231.1574  | 213.1468  | 214.1304  | 230.1496  | 107.5652 | 93.5677  | 116.0787 | R   | 1827.8733 | 1809.8627 | 1810.8463 | 1801.8939 | 1783.8834 | 1784.8669 | 914.4366 | 901.4470 | 16 |
| 3  | 30.0343  | 271.1519  | 253.1413  | 254.1249  | 243.1569  | 225.1463  | 226.1299  | 286.1789  | 270.1683  | 271.1519  | 287.1711  | 136.0759 | 122.0784 | 144.5894 | G   | 1671.7722 | 1653.7616 | 1654.7452 | 1645.7928 | 1627.7823 | 1628.7659 | 836.3861 | 823.3964 | 15 |
| 4  | 129.1139 | 427.2529  | 409.2424  | 410.2260  | 399.2579  | 381.2474  | 382.2310  | 444.2799  | 426.2694  | 427.2529  | 443.2721  | 214.1265 | 200.1290 | 222.6400 | R   | 1614.7507 | 1596.7401 | 1597.7238 | 1588.7714 | 1570.7609 | 1571.7444 | 807.8754 | 794.8857 | 14 |
| 5  | 102.0554 | 556.2955  | 538.2850  | 539.2686  | 528.3005  | 510.2900  | 511.2736  | 573.3226  | 555.3120  | 556.2955  | 572.3147  | 278.6478 | 264.6503 | 287.1613 | E   | 1458.6495 | 1440.6389 | 1441.6226 | 1432.6702 | 1414.6597 | 1415.6432 | 729.8248 | 716.8351 | 13 |
| 6  | 70.0656  | 653.3483  | 635.3377  | 636.3213  | 625.3533  | 607.3427  | 608.3263  | 670.3753  | 652.3647  | 653.3483  | 669.3674  | 327.1741 | 313.1766 | 335.6877 | P   | 1329.6071 | 1311.5964 | 1312.5801 | 1303.6277 | 1285.6172 | 1286.6007 | 665.3035 | 652.3138 | 12 |
| 7  | 30.0343  | 710.3698  | 692.3592  | 693.3428  | 682.3748  | 664.3642  | 665.3478  | 727.3968  | 709.3862  | 710.3698  | 726.3889  | 355.6849 | 341.6874 | 364.1984 | G   | 1232.5542 | 1214.5436 | 1215.5272 | 1206.5748 | 1188.5643 | 1189.5479 | 616.7771 | 603.7874 | 11 |
| 8  | 44.0499  | 781.4069  | 763.3963  | 764.3799  | 753.4119  | 735.4013  | 736.3849  | 796.4339  | 780.4233  | 781.4069  | 797.4260  | 391.2034 | 377.2059 | 399.7169 | A   | 1175.5328 | 1157.5222 | 1158.5059 | 1149.5535 | 1131.5430 | 1132.5265 | 588.2664 | 575.2767 | 10 |
| 9  | 136.0761 | 944.4702  | 926.4597  | 927.4432  | 916.4752  | 898.4647  | 899.4482  | 961.4973  | 943.4867  | 944.4702  | 960.4894  | 472.7351 | 458.7376 | 481.2486 | Y   | 1104.4957 | 1086.4851 | 1087.4688 | 1078.5164 | 1060.5059 | 1061.4894 | 552.7479 | 539.7582 | 9  |
| 10 | 70.0656  | 1041.5229 | 1023.5125 | 1024.4960 | 1013.5280 | 995.5174  | 996.5010  | 1058.5499 | 1040.5394 | 1041.5229 | 1057.5421 | 521.2615 | 507.2640 | 529.7750 | P   | 941.4324  | 923.4218  | 924.4054  | 915.4530  | 897.4424  | 898.4260  | 471.2162 | 458.2265 | 8  |
| 11 | 44.0499  | 1112.5601 | 1094.5496 | 1095.5331 | 1084.5651 | 1066.5546 | 1067.5381 | 1129.5870 | 1111.5765 | 1112.5601 | 1128.5792 | 556.7800 | 542.7825 | 565.2935 | A   | 844.3796  | 826.3690  | 827.3525  | 818.4002  | 800.3896  | 801.3732  | 422.6898 | 409.7001 | 7  |
| 12 | 86.0969  | 1225.6442 | 1207.6337 | 1208.6172 | 1197.6492 | 1179.6387 | 1180.6222 | 1242.6711 | 1224.6606 | 1225.6442 | 1241.6633 | 613.3221 | 599.3246 | 621.8356 | L   | 773.3425  | 755.3319  | 756.3154  | 747.3631  | 729.3525  | 730.3361  | 387.1712 | 374.1815 | 6  |
| 13 | 88.0398  | 1340.6694 | 1322.6605 | 1323.6440 | 1312.6760 | 1294.6655 | 1295.6490 | 1357.6980 | 1339.6875 | 1340.6694 | 1356.6902 | 670.8355 | 656.8380 | 679.3490 | D   | 660.2584  | 642.2479  | 643.2314  | 634.2791  | 616.2685  | 617.2521  | 330.6292 | 317.6395 | 5  |
| 14 | 60.0449  | 1427.7031 | 1409.6926 | 1410.6761 | 1399.7081 | 1381.6976 | 1382.6812 | 1444.7301 | 1426.7196 | 1427.7031 | 1443.7223 | 714.3516 | 700.3541 | 722.8651 | S   | 545.2220  | 527.2209  | 528.2045  | 519.2520  | 501.2416  | 502.2252  | 273.1158 | 260.1261 | 4  |
| 15 | 129.1139 | 1583.8011 | 1565.7937 | 1566.7772 | 1555.8092 | 1537.7987 | 1538.7822 | 1600.8312 | 1582.8207 | 1583.8011 | 1599.8234 | 792.4021 | 778.4046 | 800.9156 | R   | 458.1995  | 440.1889  | 441.1725  | 432.2201  | 414.2095  | 415.1931  | 229.5997 | 216.6100 | 3  |
| 16 | 101.0714 | 1711.8628 | 1693.8523 | 1694.8358 | 1683.8678 | 1665.8573 | 1666.8408 | 1728.8898 | 1710.8793 | 1711.8628 | 1727.8820 | 856.4314 | 842.4339 | 864.9449 | Q   | 302.0984  | 284.0878  | 285.0714  | 276.1190  | 258.1084  | 259.0920  | 151.5492 | 138.5595 | 2  |
| 17 | 102.0554 |           |           |           |           |           |           |           |           |           |           |          |          |          | E   | 174.0398  | 156.0292  | 157.0128  | 148.0604  | 130.0499  | 131.0334  | 87.5199  | 74.5302  | 1  |

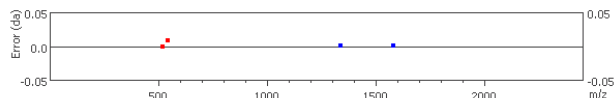

R.APHLDL.K

m/z=333.1851

Z=2

Error=2ppm

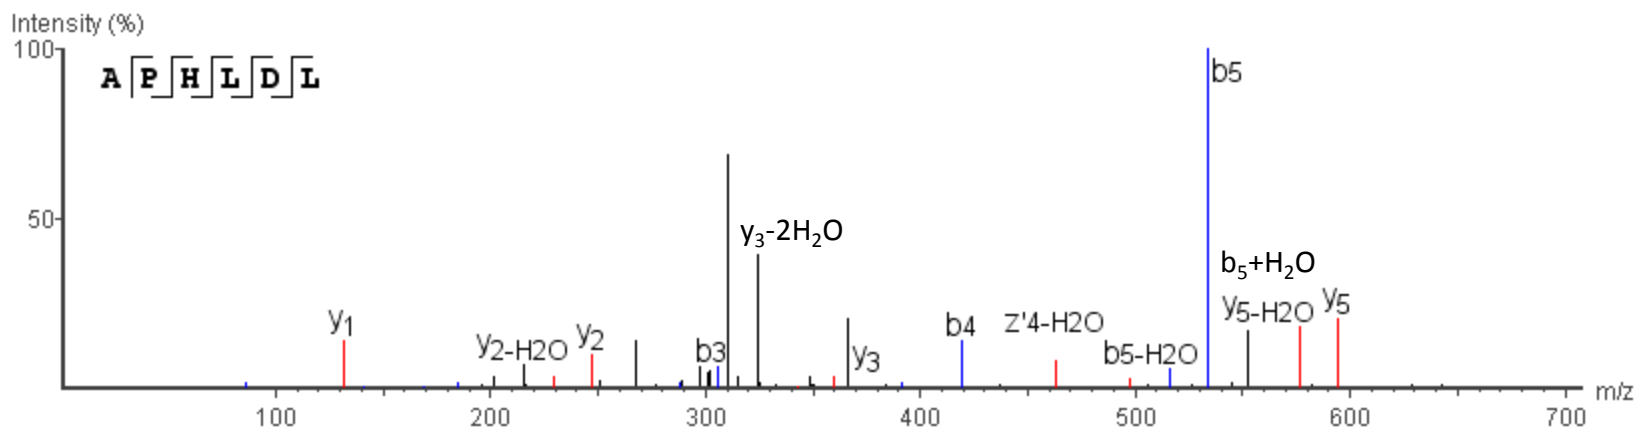

| # | Immonium | b        | b-H2O    | b-NH3    | a        | a-H2O    | a-NH3    | c        | c-H2O    | c-NH3    | c-H      | b (2+)   | a (2+)   | c (2+)   | Seq | x        | x-H2O    | x-NH3    | y        | y-H2O    | y-NH3    | x (2+)   | y (2+)   | # |   |
|---|----------|----------|----------|----------|----------|----------|----------|----------|----------|----------|----------|----------|----------|----------|-----|----------|----------|----------|----------|----------|----------|----------|----------|---|---|
| 1 | 44.0499  | 72.0449  | 54.0344  | 55.0179  | 44.0499  | 26.0394  | 27.0229  | 89.0719  | 71.0614  | 72.0449  | 88.0641  | 36.5225  | 22.5250  | 45.0360  | A   |          |          |          |          |          |          |          |          |   | 6 |
| 2 | 70.0696  | 169.0977 | 151.0871 | 152.0707 | 141.1027 | 123.0921 | 124.0757 | 186.1247 | 168.1141 | 169.0977 | 185.1169 | 85.0489  | 71.0513  | 93.5623  | P   | 620.3040 | 602.2934 | 603.2770 | 594.3247 | 576.3142 | 577.2976 | 310.6520 | 297.6623 | 5 |   |
| 3 | 110.0717 | 306.1563 | 288.1460 | 289.1296 | 278.1616 | 260.1510 | 261.1346 | 323.1836 | 305.1730 | 306.1563 | 322.1758 | 153.5783 | 139.5808 | 162.0918 | H   | 523.2512 | 505.2406 | 506.2242 | 497.2711 | 479.2612 | 480.2448 | 262.1256 | 249.1359 | 4 |   |
| 4 | 86.0969  | 419.2404 | 401.2301 | 402.2137 | 391.2457 | 373.2351 | 374.2187 | 436.2677 | 418.2571 | 419.2404 | 435.2599 | 210.1203 | 196.1228 | 218.6338 | L   | 386.1923 | 368.1817 | 369.1653 | 360.2132 | 342.2023 | 343.1859 | 193.5961 | 180.6064 | 3 |   |
| 5 | 88.0398  | 534.2669 | 516.2566 | 517.2406 | 506.2726 | 488.2620 | 489.2456 | 551.2946 | 533.2841 | 534.2669 | 550.2867 | 267.6338 | 253.6363 | 276.1473 | D   | 273.1082 | 255.0976 | 256.0812 | 247.1290 | 229.1183 | 230.1018 | 137.0541 | 124.0644 | 2 |   |
| 6 | 86.0969  |          |          |          |          |          |          |          |          |          |          |          |          |          | L   | 158.0812 | 140.0707 | 141.0542 | 132.1017 | 114.0913 | 115.0749 | 79.5406  | 66.5509  | 1 |   |

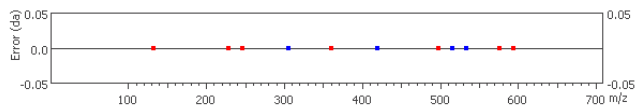

R.IPAGSLKNEPTN.R

m/z=678.3437

Error=0ppm

Z=2

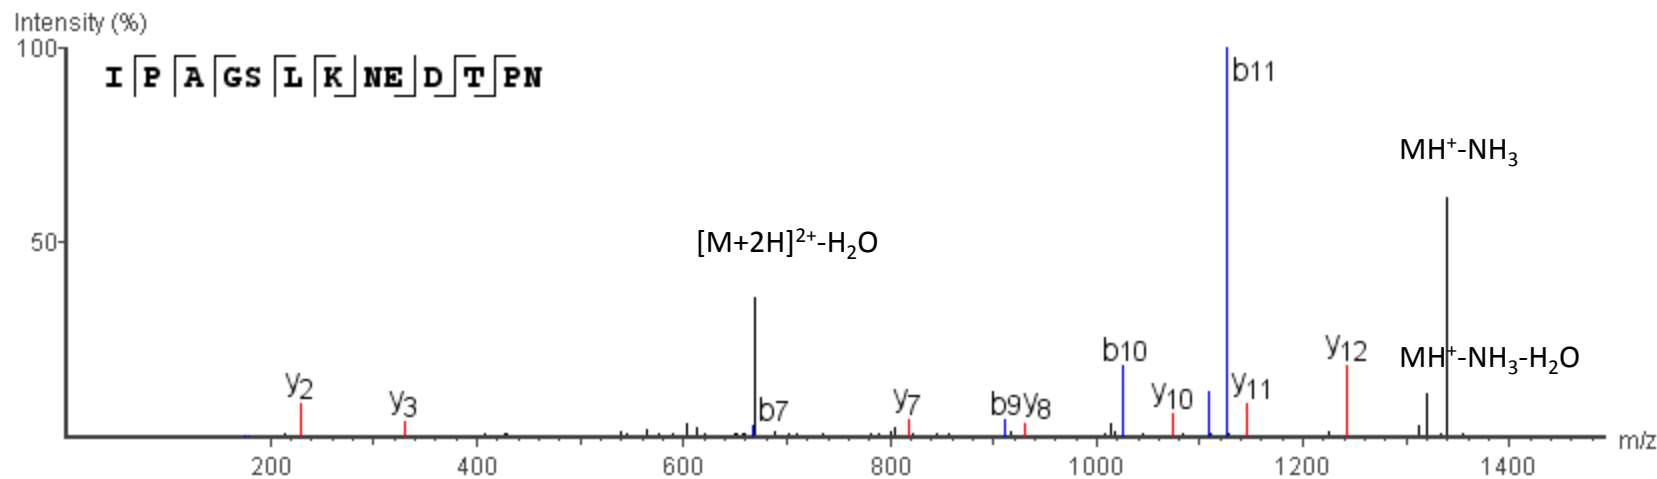

| #  | Immonium | b         | b-H2O     | b-NH3     | a         | a-H2O     | a-NH3     | c         | c-H2O     | c-NH3     | c-H       | b (2+)   | a (2+)   | c (2+)   | Seq | x         | x-H2O     | x-NH3     | y         | y-H2O     | y-NH3     | x (2+)   | y (2+)   | #  |    |
|----|----------|-----------|-----------|-----------|-----------|-----------|-----------|-----------|-----------|-----------|-----------|----------|----------|----------|-----|-----------|-----------|-----------|-----------|-----------|-----------|----------|----------|----|----|
| 1  | 86.0969  | 114.0919  | 96.0813   | 97.0649   | 86.0969   | 68.0863   | 69.0699   | 131.1189  | 113.1083  | 114.0919  | 130.1111  | 57.5459  | 43.5484  | 66.0594  | I   |           |           |           |           |           |           |          |          |    | 13 |
| 2  | 70.0656  | 211.1446  | 193.1341  | 194.1176  | 183.1496  | 165.1391  | 166.1226  | 228.1716  | 210.1611  | 211.1446  | 227.1638  | 106.0723 | 92.0748  | 114.5858 | P   | 1268.5754 | 1250.5648 | 1251.5485 | 1242.5981 | 1224.5856 | 1225.5691 | 634.7877 | 621.7980 | 12 |    |
| 3  | 44.0499  | 282.1817  | 264.1712  | 265.1548  | 254.1867  | 236.1762  | 237.1597  | 299.2087  | 281.1982  | 282.1817  | 298.2009  | 141.5909 | 127.5934 | 150.1044 | A   | 1171.5226 | 1153.5120 | 1154.4956 | 1145.5428 | 1127.5327 | 1128.5162 | 586.2613 | 573.2716 | 11 |    |
| 4  | 30.0343  | 339.2032  | 321.1926  | 322.1762  | 311.2082  | 293.1976  | 294.1812  | 356.2302  | 338.2196  | 339.2032  | 355.2224  | 170.1016 | 156.1041 | 178.6151 | G   | 1100.4855 | 1082.4749 | 1083.4585 | 1074.5051 | 1056.4956 | 1057.4791 | 550.7427 | 537.7531 | 10 |    |
| 5  | 60.0449  | 426.2352  | 408.2247  | 409.2083  | 398.2402  | 380.2297  | 381.2133  | 443.2622  | 425.2517  | 426.2352  | 442.2544  | 213.6176 | 199.6201 | 222.1311 | S   | 1043.4640 | 1025.4535 | 1026.4370 | 1017.4847 | 999.4741  | 1000.4577 | 522.2320 | 509.2423 | 9  |    |
| 6  | 86.0969  | 539.3193  | 521.3087  | 522.2923  | 511.3243  | 493.3137  | 494.2973  | 556.3463  | 538.3358  | 539.3193  | 555.3384  | 270.1596 | 256.1621 | 278.6732 | L   | 956.4320  | 938.4214  | 939.4050  | 930.4532  | 912.4421  | 913.4257  | 478.7160 | 465.7263 | 8  |    |
| 7  | 101.1078 | 667.4139  | 649.4037  | 650.3873  | 639.4193  | 621.4087  | 622.3923  | 684.4413  | 666.4307  | 667.4139  | 683.4334  | 334.2071 | 320.2096 | 342.7206 | K   | 843.3480  | 825.3374  | 826.3209  | 817.3682  | 799.3580  | 800.3416  | 422.1740 | 409.1843 | 7  |    |
| 8  | 87.0558  | 781.4572  | 763.4466  | 764.4302  | 753.4622  | 735.4516  | 736.4352  | 798.4842  | 780.4736  | 781.4572  | 797.4763  | 391.2286 | 377.2311 | 399.7421 | N   | 715.2531  | 697.2425  | 698.2261  | 689.2737  | 671.2631  | 672.2467  | 358.1265 | 345.1368 | 6  |    |
| 9  | 102.0554 | 910.4988  | 892.4892  | 893.4728  | 882.5048  | 864.4942  | 865.4778  | 927.5268  | 909.5162  | 910.4988  | 926.5189  | 455.7499 | 441.7524 | 464.2634 | E   | 601.2101  | 583.1995  | 584.1831  | 575.2307  | 557.2202  | 558.2037  | 301.1050 | 288.1154 | 5  |    |
| 10 | 88.0398  | 1025.5258 | 1007.5162 | 1008.4998 | 997.5317  | 979.5212  | 980.5048  | 1042.5537 | 1024.5432 | 1025.5258 | 1041.5459 | 513.2634 | 499.2659 | 521.7769 | D   | 472.1675  | 454.1570  | 455.1405  | 446.1881  | 428.1776  | 429.1612  | 236.5838 | 223.5941 | 4  |    |
| 11 | 74.0605  | 1126.5735 | 1108.5631 | 1109.5474 | 1098.5793 | 1080.5688 | 1081.5524 | 1143.6013 | 1125.5908 | 1126.5735 | 1142.5935 | 563.7872 | 549.7897 | 572.3007 | T   | 357.1406  | 339.1300  | 340.1136  | 331.1615  | 313.1506  | 314.1342  | 179.0703 | 166.0806 | 3  |    |
| 12 | 70.0656  | 1223.6272 | 1205.6167 | 1206.6002 | 1195.6322 | 1177.6217 | 1178.6052 | 1240.6542 | 1222.6437 | 1223.6272 | 1239.6464 | 612.3136 | 598.3161 | 620.8271 | P   | 256.0929  | 238.0823  | 239.0659  | 230.1139  | 212.1030  | 213.0865  | 128.5464 | 115.5568 | 2  |    |
| 13 | 87.0558  |           |           |           |           |           |           |           |           |           |           |          |          |          | N   | 159.0401  | 141.0296  | 142.0131  | 133.0608  | 115.0502  | 116.0338  | 80.0201  | 67.0304  | 1  |    |

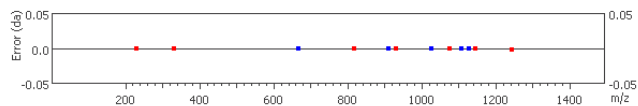

A.FPKPEGSQDKSLHN.R

m/z=528.5979

Z=3

Error=-1.3ppm

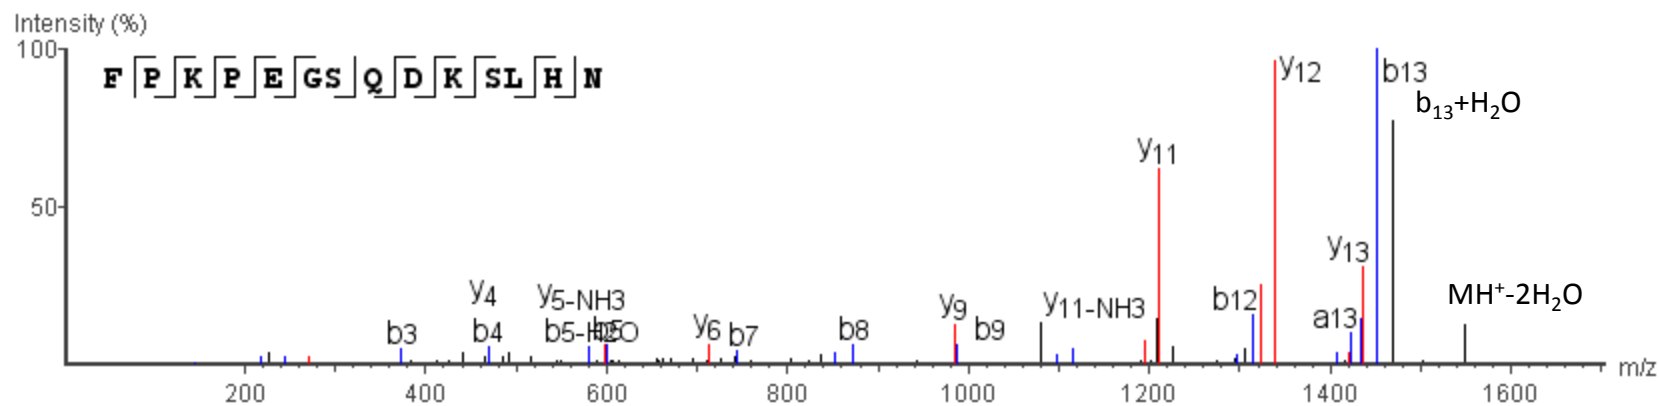

| #  | Immonium | b         | b-H2O     | b-NH3     | a         | a-H2O     | a-NH3     | c         | c-H2O     | c-NH3     | c-H       | b (2+)   | a (2+)   | c (2+)   | Seq | x         | x-H2O     | x-NH3     | y         | y-H2O     | y-NH3     | x (2+)   | y (2+)   | #  |    |
|----|----------|-----------|-----------|-----------|-----------|-----------|-----------|-----------|-----------|-----------|-----------|----------|----------|----------|-----|-----------|-----------|-----------|-----------|-----------|-----------|----------|----------|----|----|
| 1  | 120.0812 | 148.0762  | 130.0657  | 131.0492  | 120.0812  | 102.0707  | 103.0542  | 165.1032  | 147.0927  | 148.0762  | 164.0954  | 74.5381  | 60.5406  | 83.0516  | F   |           |           |           |           |           |           |          |          |    | 14 |
| 2  | 70.0656  | 245.1284  | 227.1184  | 228.1020  | 217.1334  | 199.1234  | 200.1070  | 262.1560  | 244.1454  | 245.1284  | 261.1482  | 123.0645 | 109.0670 | 131.5780 | P   | 1462.6921 | 1444.6815 | 1445.6652 | 1436.7094 | 1418.7023 | 1419.6851 | 731.8461 | 718.8564 | 13 |    |
| 3  | 101.1078 | 373.2234  | 355.2134  | 356.1970  | 345.2289  | 327.2184  | 328.2020  | 390.2509  | 372.2404  | 373.2234  | 389.2431  | 187.1120 | 173.1145 | 195.6255 | K   | 1365.6394 | 1347.6288 | 1348.6124 | 1339.6580 | 1321.6495 | 1322.6272 | 683.3197 | 670.3300 | 12 |    |
| 4  | 70.0656  | 470.2354  | 452.2661  | 453.2497  | 442.2817  | 424.2711  | 425.2547  | 487.3037  | 469.2931  | 470.2354  | 486.2959  | 235.6383 | 221.6408 | 244.1518 | P   | 1237.5444 | 1219.5338 | 1220.5175 | 1211.5630 | 1193.5546 | 1194.5339 | 619.2722 | 606.2825 | 11 |    |
| 5  | 102.0554 | 599.3190  | 581.3038  | 582.2923  | 571.3243  | 553.3137  | 554.2973  | 616.3463  | 598.3302  | 599.3190  | 615.3384  | 300.1596 | 286.1621 | 308.6732 | E   | 1140.4917 | 1122.4811 | 1123.4647 | 1114.5466 | 1096.5018 | 1097.5240 | 570.7458 | 557.7562 | 10 |    |
| 6  | 30.0343  | 656.3408  | 638.3302  | 639.3138  | 628.3458  | 610.3352  | 611.3188  | 673.3678  | 655.3572  | 656.3408  | 672.3599  | 328.6704 | 314.6729 | 337.1839 | G   | 1011.4491 | 993.4385  | 994.4221  | 985.4691  | 967.4592  | 968.4427  | 506.2245 | 493.2349 | 9  |    |
| 7  | 60.0449  | 743.3683  | 725.3622  | 726.3458  | 715.3777  | 697.3672  | 698.3508  | 760.3998  | 742.3892  | 743.3683  | 759.3919  | 372.1864 | 358.1889 | 380.6999 | S   | 954.4276  | 936.4171  | 937.4006  | 928.4482  | 910.4377  | 911.4213  | 477.7138 | 464.7241 | 8  |    |
| 8  | 101.0714 | 871.4301  | 853.4095  | 854.4044  | 843.4363  | 825.4258  | 826.4094  | 888.4584  | 870.4478  | 871.4301  | 887.4505  | 436.2157 | 422.2182 | 444.7292 | Q   | 867.3956  | 849.3851  | 850.3687  | 841.4163  | 823.4057  | 824.3893  | 434.1978 | 421.2081 | 7  |    |
| 9  | 88.0398  | 986.4560  | 968.4477  | 969.4313  | 958.4633  | 940.4527  | 941.4363  | 1003.4853 | 985.4691  | 986.4560  | 1002.4774 | 493.7291 | 479.7316 | 502.2426 | D   | 739.3370  | 721.3265  | 722.3101  | 713.3566  | 695.3471  | 696.3307  | 370.1685 | 357.1788 | 6  |    |
| 10 | 101.1078 | 1114.5466 | 1096.5427 | 1097.5240 | 1086.5582 | 1068.5477 | 1069.5312 | 1131.5802 | 1113.5697 | 1114.5466 | 1130.5724 | 557.7766 | 543.7791 | 566.2901 | K   | 624.3101  | 606.2995  | 607.2831  | 598.3302  | 580.3201  | 581.3038  | 312.6550 | 299.6653 | 5  |    |
| 11 | 60.0449  | 1201.5852 | 1183.5747 | 1184.5582 | 1173.5902 | 1155.5797 | 1156.5632 | 1218.6122 | 1200.6017 | 1201.5852 | 1217.6044 | 601.2926 | 587.2951 | 609.8061 | S   | 496.2151  | 478.2046  | 479.1881  | 470.2354  | 452.2252  | 453.2088  | 248.6076 | 235.6179 | 4  |    |
| 12 | 86.0969  | 1314.6669 | 1296.6553 | 1297.6423 | 1286.6743 | 1268.6638 | 1269.6473 | 1331.6963 | 1313.6858 | 1314.6669 | 1330.6885 | 657.8347 | 643.8372 | 666.3481 | L   | 409.1831  | 391.1725  | 392.1561  | 383.2037  | 365.1932  | 366.1768  | 205.0916 | 192.1019 | 3  |    |
| 13 | 110.0717 | 1451.7258 | 1433.7155 | 1434.7013 | 1423.7303 | 1405.7228 | 1406.7034 | 1468.7552 | 1450.7448 | 1451.7258 | 1467.7474 | 726.3641 | 712.3666 | 734.8776 | H   | 296.0990  | 278.0885  | 279.0720  | 270.1198  | 252.1091  | 253.0927  | 148.5495 | 135.5598 | 2  |    |
| 14 | 87.0558  |           |           |           |           |           |           |           |           |           |           |          |          |          | N   | 159.0401  | 141.0296  | 142.0131  | 133.0608  | 115.0502  | 116.0338  | 80.0201  | 67.0304  | 1  |    |

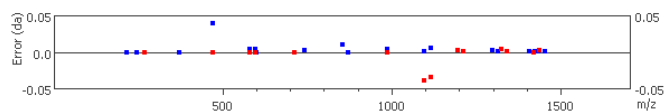

R.SANSNPAMAPRE.R

m/z=622.7891

Error=1.7ppm

Z=2

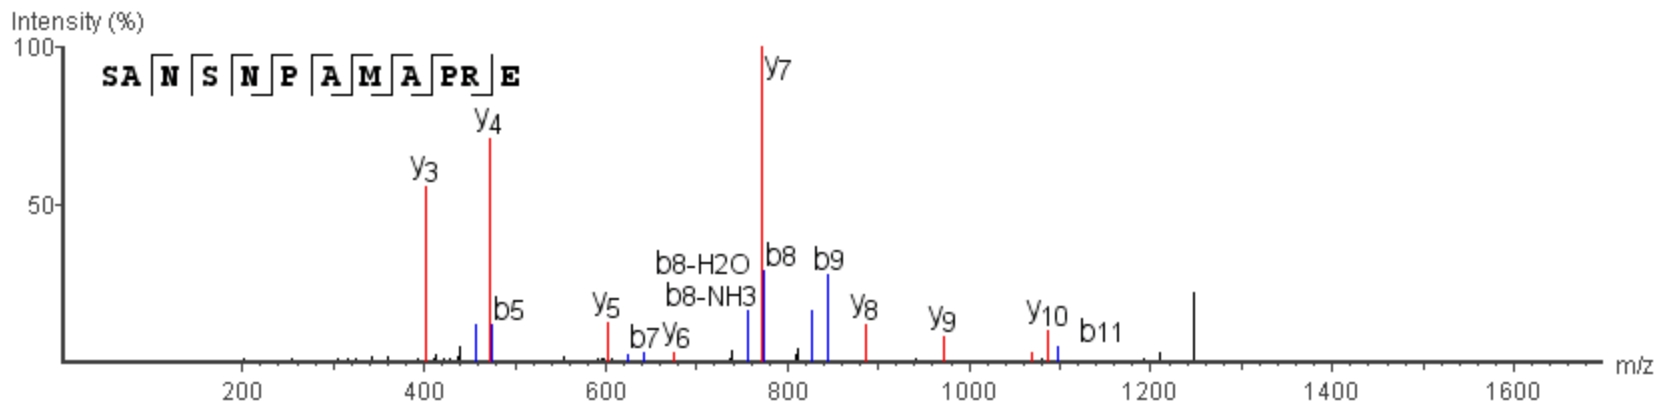

| #  | Inmonium | b         | b-H2O     | b-NH3     | a         | a-H2O     | a-NH3     | c         | c-H2O     | c-NH3     | c-H       | b (2+)   | a (2+)   | c (2+)   | Seq | x         | x-H2O     | x-NH3     | y         | y-H2O     | y-NH3     | x (2+)   | y (2+)   | #  |    |
|----|----------|-----------|-----------|-----------|-----------|-----------|-----------|-----------|-----------|-----------|-----------|----------|----------|----------|-----|-----------|-----------|-----------|-----------|-----------|-----------|----------|----------|----|----|
| 1  | 60.0449  | 88.0399   | 70.0293   | 71.0129   | 60.0449   | 42.0343   | 43.0179   | 105.0669  | 87.0563   | 88.0399   | 104.0590  | 44.5199  | 30.5224  | 53.0334  | S   |           |           |           |           |           |           |          |          |    | 12 |
| 2  | 44.0499  | 159.0770  | 141.0664  | 142.0500  | 131.0820  | 113.0714  | 114.0550  | 176.1040  | 158.0934  | 159.0770  | 175.0961  | 80.0385  | 66.0410  | 88.5520  | A   | 1183.5161 | 1165.5055 | 1166.4891 | 1157.5367 | 1139.5262 | 1140.5098 | 592.2581 | 579.2684 | 11 |    |
| 3  | 87.0558  | 273.1199  | 255.1093  | 256.0929  | 245.1249  | 227.1143  | 228.0979  | 290.1469  | 272.1363  | 273.1199  | 289.1391  | 137.0599 | 123.0624 | 145.5734 | N   | 1112.4790 | 1094.4684 | 1095.4520 | 1086.4998 | 1068.4888 | 1069.4727 | 556.7395 | 543.7498 | 10 |    |
| 4  | 60.0449  | 360.1519  | 342.1414  | 343.1249  | 332.1569  | 314.1464  | 315.1299  | 377.1789  | 359.1684  | 360.1519  | 376.1711  | 180.5760 | 166.5785 | 189.0895 | S   | 998.4361  | 980.4255  | 981.4091  | 972.4576  | 954.4462  | 955.4297  | 499.7180 | 486.7284 | 9  |    |
| 5  | 87.0558  | 474.1948  | 456.1841  | 457.1683  | 446.1998  | 428.1893  | 429.1729  | 491.2218  | 473.2113  | 474.1948  | 490.2140  | 237.5974 | 223.5999 | 246.1109 | N   | 911.4041  | 893.3935  | 894.3771  | 885.4257  | 867.4141  | 868.3977  | 456.2020 | 443.2123 | 8  |    |
| 6  | 70.0656  | 571.2476  | 553.2371  | 554.2206  | 543.2526  | 525.2421  | 526.2256  | 588.2747  | 570.2641  | 571.2476  | 587.2668  | 286.1238 | 272.1263 | 294.6373 | P   | 797.3611  | 779.3505  | 780.3341  | 771.3825  | 753.3712  | 754.3547  | 399.1805 | 386.1909 | 7  |    |
| 7  | 44.0499  | 642.2845  | 624.2742  | 625.2590  | 614.2897  | 596.2792  | 597.2628  | 659.3118  | 641.3012  | 642.2845  | 658.3039  | 321.6424 | 307.6449 | 330.1559 | A   | 700.3083  | 682.2978  | 683.2814  | 674.3296  | 656.3184  | 657.3020  | 350.6542 | 337.6645 | 6  |    |
| 8  | 104.0533 | 773.3253  | 755.3151  | 756.2984  | 745.3302  | 727.3196  | 728.3032  | 790.3522  | 772.3417  | 773.3253  | 789.3444  | 387.1626 | 373.1651 | 395.6761 | M   | 629.2712  | 611.2607  | 612.2443  | 603.2924  | 585.2813  | 586.2649  | 315.1356 | 302.1459 | 5  |    |
| 9  | 44.0499  | 844.3621  | 826.3519  | 827.3341  | 816.3673  | 798.3568  | 799.3403  | 861.3893  | 843.3788  | 844.3621  | 860.3815  | 422.6812 | 408.6837 | 431.1947 | A   | 498.2307  | 480.2202  | 481.2037  | 472.2515  | 454.2408  | 455.2244  | 249.6154 | 236.6257 | 4  |    |
| 10 | 70.0656  | 941.4150  | 923.4045  | 924.3881  | 913.4200  | 895.4095  | 896.3931  | 958.4421  | 940.4315  | 941.4150  | 957.4342  | 471.2075 | 457.2100 | 479.7210 | P   | 427.1936  | 409.1831  | 410.1666  | 401.2151  | 383.2037  | 384.1873  | 214.0968 | 201.1071 | 3  |    |
| 11 | 129.1139 | 1097.5197 | 1079.5056 | 1080.4891 | 1069.5211 | 1051.5106 | 1052.4941 | 1114.5431 | 1096.5326 | 1097.5197 | 1113.5353 | 549.2581 | 535.2606 | 557.7715 | R   | 330.1409  | 312.1303  | 313.1139  | 304.1615  | 286.1509  | 287.1345  | 165.5704 | 152.5807 | 2  |    |
| 12 | 102.0554 |           |           |           |           |           |           |           |           |           |           |          |          |          | E   | 174.0398  | 156.0292  | 157.0128  | 148.0604  | 130.0499  | 131.0334  | 87.5199  | 74.5302  | 1  |    |

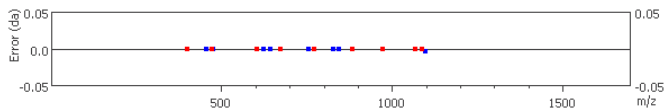



K.AGCKNFFWKTFTSC

m/z=820.3743

Error=1.1ppm

Z=2

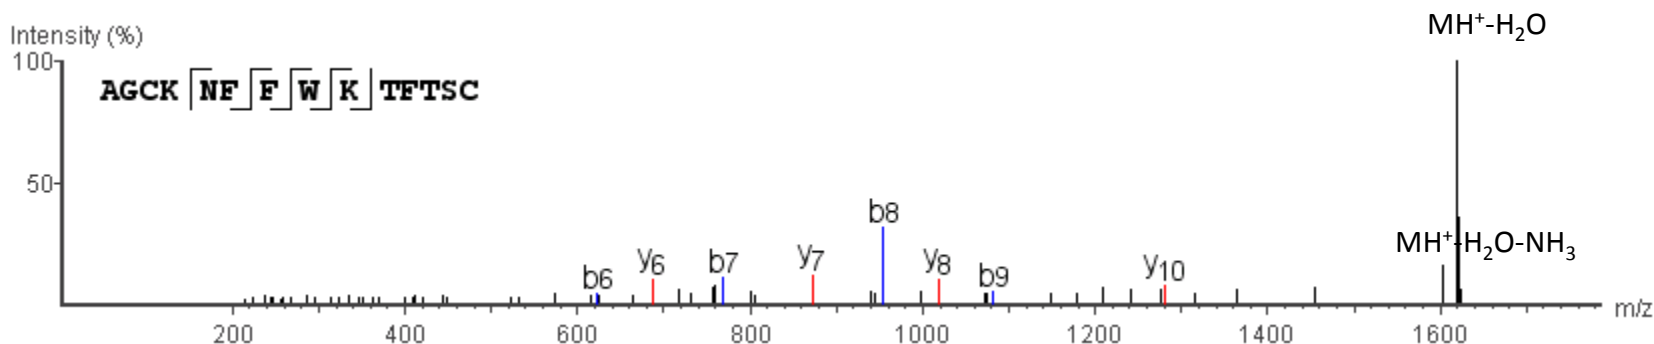

| #  | Immonium | b                | b-H2O     | b-NH3     | a         | a-H2O     | a-NH3     | c         | c-H2O     | c-NH3            | c-H       | b (2+)   | a (2+)   | c (2+)   | Seq | x         | x-H2O     | x-NH3     | y                | y-H2O     | y-NH3     | x (2+)   | y (2+)   | #  |    |
|----|----------|------------------|-----------|-----------|-----------|-----------|-----------|-----------|-----------|------------------|-----------|----------|----------|----------|-----|-----------|-----------|-----------|------------------|-----------|-----------|----------|----------|----|----|
| 1  | 44.0499  | 72.0449          | 54.0344   | 55.0179   | 44.0499   | 26.0394   | 27.0229   | 89.0719   | 71.0614   | 72.0449          | 88.0641   | 36.5225  | 22.5250  | 45.0360  | A   |           |           |           |                  |           |           |          |          |    | 14 |
| 2  | 30.0343  | 129.0664         | 111.0558  | 112.0394  | 101.0714  | 83.0608   | 84.0444   | 146.0934  | 128.0828  | 129.0664         | 145.0856  | 65.0332  | 51.0357  | 73.5467  | G   | 1594.6818 | 1576.6711 | 1577.6548 | 1568.7024        | 1550.6919 | 1551.6754 | 797.8409 | 784.8512 | 13 |    |
| 3  | 76.0220  | 232.0756         | 214.0650  | 215.0486  | 204.0806  | 186.0700  | 187.0536  | 249.1026  | 231.0920  | 232.0756         | 248.0948  | 116.5378 | 102.5403 | 125.0513 | C   | 1537.6604 | 1519.6498 | 1520.6334 | 1511.6810        | 1493.6705 | 1494.6541 | 769.3302 | 756.3405 | 12 |    |
| 4  | 101.1078 | 360.1705         | 342.1600  | 343.1436  | 332.1755  | 314.1650  | 315.1486  | 377.1975  | 359.1870  | 360.1705         | 376.1897  | 180.5853 | 166.5878 | 189.0988 | K   | 1434.6511 | 1416.6405 | 1417.6241 | 1408.6718        | 1390.6613 | 1391.6448 | 717.8256 | 704.8359 | 11 |    |
| 5  | 67.0558  | 474.2135         | 456.2029  | 457.1865  | 446.2185  | 428.2079  | 429.1915  | 491.2405  | 473.2299  | 474.2135         | 490.2327  | 237.6067 | 223.6092 | 246.1202 | N   | 1306.5562 | 1288.5455 | 1289.5292 | <b>1280.5742</b> | 1262.5663 | 1263.5498 | 653.7781 | 640.7884 | 10 |    |
| 6  | 120.0812 | <b>621.2839</b>  | 603.2713  | 604.2549  | 593.2869  | 575.2763  | 576.2599  | 638.3089  | 620.2983  | <b>621.2839</b>  | 637.3010  | 311.1409 | 297.1434 | 319.6544 | F   | 1192.5133 | 1174.5027 | 1175.4863 | 1166.5339        | 1148.5234 | 1149.5070 | 596.7567 | 583.7670 | 9  |    |
| 7  | 120.0812 | <b>768.3477</b>  | 750.3397  | 751.3233  | 740.3553  | 722.3447  | 723.3283  | 785.3773  | 767.3666  | <b>768.3477</b>  | 784.3694  | 394.6751 | 370.6776 | 393.1887 | F   | 1045.4448 | 1027.4343 | 1028.4178 | <b>1019.4680</b> | 1001.4550 | 1002.4385 | 523.2224 | 510.2328 | 8  |    |
| 8  | 159.0921 | <b>954.4300</b>  | 936.4190  | 937.4026  | 926.4346  | 908.4240  | 909.4076  | 971.4566  | 953.4460  | <b>954.4300</b>  | 970.4487  | 477.7148 | 463.7173 | 486.2283 | W   | 896.3765  | 880.3659  | 881.3495  | <b>872.3989</b>  | 854.3865  | 855.3701  | 449.6882 | 436.6985 | 7  |    |
| 9  | 101.1078 | <b>1082.5282</b> | 1064.5140 | 1065.4976 | 1054.5295 | 1036.5190 | 1037.5026 | 1099.5515 | 1081.5410 | <b>1082.5282</b> | 1098.5437 | 541.7623 | 527.7648 | 550.2758 | K   | 712.2971  | 694.2866  | 695.2701  | <b>686.3187</b>  | 668.3072  | 669.2908  | 356.6486 | 343.6589 | 6  |    |
| 10 | 74.0605  | 1183.5723        | 1165.5618 | 1166.5453 | 1155.5773 | 1137.5668 | 1138.5503 | 1200.5992 | 1182.5887 | 1183.5723        | 1199.5914 | 592.2861 | 578.2886 | 600.7996 | T   | 584.2022  | 566.1917  | 567.1752  | 558.2228         | 540.2123  | 541.1959  | 292.6011 | 279.6114 | 5  |    |
| 11 | 120.0812 | 1330.6406        | 1312.6301 | 1313.6136 | 1302.6456 | 1284.6351 | 1285.6187 | 1347.6676 | 1329.6571 | 1330.6406        | 1346.6598 | 665.8203 | 651.8228 | 674.3338 | F   | 483.1545  | 465.1440  | 466.1275  | 457.1751         | 439.1646  | 440.1482  | 242.0773 | 229.0876 | 4  |    |
| 12 | 74.0605  | 1431.6884        | 1413.6779 | 1414.6614 | 1403.6934 | 1385.6829 | 1386.6664 | 1448.7153 | 1430.7048 | 1431.6884        | 1447.7075 | 716.3442 | 702.3467 | 724.8577 | T   | 336.0861  | 318.0755  | 319.0591  | 310.1067         | 292.0962  | 293.0797  | 168.5430 | 155.5534 | 3  |    |
| 13 | 60.0449  | 1518.7203        | 1500.7098 | 1501.6934 | 1490.7253 | 1472.7148 | 1473.6984 | 1535.7473 | 1517.7368 | 1518.7203        | 1534.7395 | 759.8602 | 745.8627 | 768.3737 | S   | 235.0384  | 217.0279  | 218.0114  | 209.0591         | 191.0485  | 192.0321  | 118.0192 | 105.0295 | 2  |    |
| 14 | 76.0220  |                  |           |           |           |           |           |           |           |                  |           |          | 745.8627 | 768.3737 | C   | 148.0064  | 129.9958  | 130.9794  | 122.0270         | 104.0165  | 105.0000  | 74.5032  | 61.5135  | 1  |    |

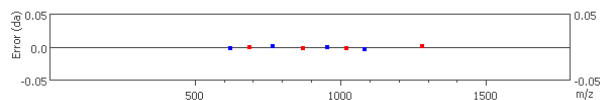

R.HADGVFTSDYSRLLGQISAKKYLESLI(-.98).G

m/z=753.4044

Error=-1.2ppm

Z=4

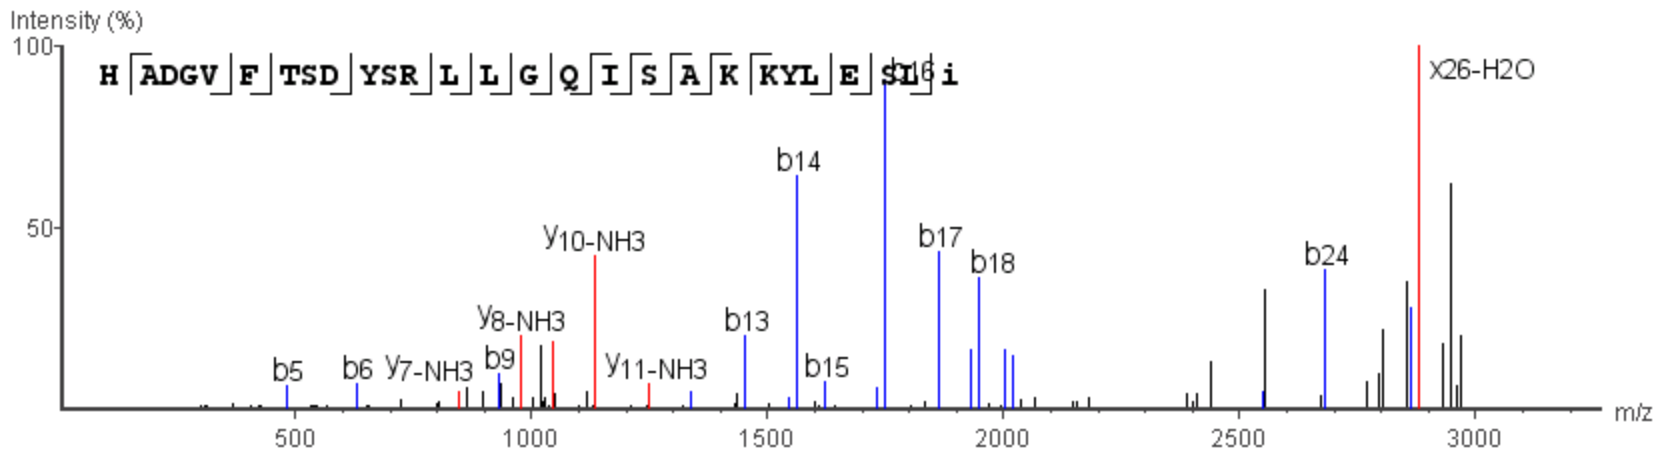

| #  | Immonium | b                | b-H2O            | b-NH3            | a         | a-H2O     | a-NH3     | c         | c-H2O            | c-NH3            | c-H       | b (2+)    | a (2+)    | c (2+)    | Seq     | x         | x-H2O            | x-NH3     | y         | y-H2O     | y-NH3            | x (2+)    | y (2+)    | #  |
|----|----------|------------------|------------------|------------------|-----------|-----------|-----------|-----------|------------------|------------------|-----------|-----------|-----------|-----------|---------|-----------|------------------|-----------|-----------|-----------|------------------|-----------|-----------|----|
| 1  | 110.0717 | 138.0667         | 120.0562         | 121.0397         | 110.0717  | 92.0612   | 93.0447   | 155.0937  | 137.0832         | 138.0667         | 154.0859  | 69.5334   | 55.5359   | 78.0469   | H       |           |                  |           |           |           |                  |           |           | 27 |
| 2  | 44.0499  | 209.1039         | 191.0933         | 192.0768         | 181.1089  | 163.0983  | 164.0818  | 226.1308  | 208.1203         | 209.1039         | 225.1230  | 105.0519  | 91.0544   | 113.5654  | A       | 2899.5239 | <b>2881.4905</b> | 2882.4971 | 2873.5447 | 2855.5342 | 2856.5176        | 1450.2620 | 1437.2723 | 26 |
| 3  | 88.0398  | 324.1308         | 306.1202         | 307.1038         | 296.1358  | 278.1252  | 279.1088  | 341.1578  | 323.1472         | 324.1308         | 340.1500  | 162.5654  | 148.5679  | 171.0789  | D       | 2828.4868 | 2810.4763        | 2811.4600 | 2802.5076 | 2784.4971 | 2785.4805        | 1414.7434 | 1401.7538 | 25 |
| 4  | 30.0343  | 381.1522         | 363.1417         | 364.1252         | 353.1572  | 335.1467  | 336.1302  | 398.1792  | 380.1687         | 381.1522         | 397.1714  | 191.0761  | 177.0786  | 199.5896  | G       | 2713.4600 | 2695.4495        | 2696.4331 | 2687.4807 | 2669.4702 | 2670.4536        | 1357.2300 | 1344.2404 | 24 |
| 5  | 72.0812  | <b>480.2203</b>  | 462.2101         | 463.1937         | 452.2256  | 434.2151  | 435.1987  | 497.2477  | 479.2371         | <b>480.2203</b>  | 496.2398  | 240.6103  | 226.6128  | 249.1238  | V       | 2656.4385 | 2638.4280        | 2639.4116 | 2630.4592 | 2612.4487 | 2613.4321        | 1328.7192 | 1315.7296 | 23 |
| 6  | 120.0812 | <b>627.2882</b>  | 609.2785         | 610.2621         | 599.2941  | 581.2835  | 582.2671  | 644.3161  | 626.3055         | <b>627.2882</b>  | 643.3082  | 314.1445  | 300.1470  | 322.6581  | F       | 2557.3699 | 2539.3594        | 2540.3430 | 2531.3906 | 2513.3801 | 2514.3635        | 1279.1849 | 1266.1953 | 22 |
| 7  | 74.0605  | 728.3367         | 710.3262         | 711.3098         | 700.3417  | 682.3312  | 683.3148  | 745.3638  | 727.3532         | 728.3367         | 744.3559  | 364.6684  | 350.6709  | 373.1819  | T       | 2410.3015 | 2392.2910        | 2393.2747 | 2384.3223 | 2366.3118 | 2367.2952        | 1205.6508 | 1192.6611 | 21 |
| 8  | 60.0449  | 815.3688         | 797.3582         | 798.3418         | 787.3738  | 769.3632  | 770.3468  | 832.3958  | 814.3853         | 815.3688         | 831.3879  | 408.1844  | 394.1869  | 416.6979  | S       | 2309.2539 | 2291.2434        | 2292.2271 | 2283.2747 | 2265.2642 | 2266.2476        | 1155.1270 | 1142.1373 | 20 |
| 9  | 88.0398  | <b>930.3949</b>  | 912.3851         | 913.3687         | 902.4007  | 884.3901  | 885.3737  | 947.4227  | 929.4122         | <b>930.3949</b>  | 946.4149  | 465.6978  | 451.7003  | 474.2114  | D       | 2222.2219 | 2204.2114        | 2205.1951 | 2196.2427 | 2178.2322 | 2179.2156        | 1111.6110 | 1098.6213 | 19 |
| 10 | 136.0761 | 1093.4590        | 1075.4485        | 1076.4320        | 1065.4640 | 1047.4535 | 1048.4370 | 1110.4860 | 1092.4755        | 1093.4590        | 1109.4781 | 547.2295  | 533.2320  | 555.7430  | Y       | 2107.1948 | 2089.1843        | 2090.1680 | 2081.2156 | 2063.2051 | 2064.1885        | 1054.0974 | 1041.1078 | 18 |
| 11 | 60.0449  | 1180.4911        | 1162.4806        | 1163.4641        | 1152.4961 | 1134.4856 | 1135.4691 | 1197.5181 | 1179.5076        | 1180.4911        | 1196.5103 | 590.7455  | 576.7480  | 599.2590  | S       | 1944.1317 | 1926.1211        | 1927.1047 | 1918.1523 | 1900.1418 | 1901.1254        | 972.5659  | 959.5762  | 17 |
| 12 | 129.1139 | <b>1336.5914</b> | 1318.5817        | 1319.5652        | 1308.5972 | 1290.5867 | 1291.5702 | 1353.6191 | 1335.6086        | <b>1336.5914</b> | 1352.6113 | 668.7961  | 654.7986  | 677.3096  | R       | 1857.0997 | 1839.0891        | 1840.0728 | 1831.1204 | 1813.1099 | 1814.0934        | 929.0499  | 916.0602  | 16 |
| 13 | 86.0969  | <b>1449.6752</b> | 1431.6658        | 1432.6493        | 1421.6813 | 1403.6708 | 1404.6543 | 1466.7032 | 1448.6927        | <b>1449.6752</b> | 1465.6954 | 725.3381  | 711.3406  | 733.8516  | L       | 1700.9985 | 1682.9879        | 1683.9716 | 1675.0192 | 1657.0087 | 1657.9922        | 850.9993  | 838.0096  | 15 |
| 14 | 86.0969  | <b>1562.7590</b> | <b>1544.7460</b> | 1545.7333        | 1534.7653 | 1516.7548 | 1517.7383 | 1579.7872 | 1561.7767        | <b>1562.7590</b> | 1578.7794 | 781.8801  | 767.8826  | 790.3936  | L       | 1587.9146 | 1569.9039        | 1570.8876 | 1561.9352 | 1543.9247 | 1544.9082        | 794.4573  | 781.4676  | 14 |
| 15 | 30.0343  | <b>1619.7792</b> | 1601.7712        | 1602.7548        | 1591.7867 | 1573.7762 | 1574.7598 | 1636.8087 | 1618.7982        | <b>1619.7792</b> | 1635.8009 | 810.3909  | 796.3934  | 818.9044  | G       | 1474.8304 | 1456.8198        | 1457.8035 | 1448.8511 | 1430.8406 | 1431.8241        | 737.9152  | 724.9255  | 13 |
| 16 | 101.0714 | <b>1747.8392</b> | <b>1729.8290</b> | <b>1730.8320</b> | 1719.8453 | 1701.8348 | 1702.8184 | 1764.8673 | 1746.8568        | <b>1747.8392</b> | 1763.8595 | 874.4202  | 860.4227  | 882.9337  | Q       | 1417.8090 | 1399.7983        | 1400.7820 | 1391.8296 | 1373.8191 | 1374.8026        | 709.4045  | 696.4148  | 12 |
| 17 | 86.0969  | <b>1860.9224</b> | 1842.9139        | 1843.8975        | 1832.9294 | 1814.9189 | 1815.9025 | 1877.9514 | 1859.9409        | <b>1860.9224</b> | 1876.9436 | 930.9622  | 916.9647  | 939.4757  | I       | 1289.7504 | 1271.7397        | 1272.7234 | 1263.7710 | 1245.7605 | <b>1246.7394</b> | 645.3752  | 632.3855  | 11 |
| 18 | 60.0449  | <b>1947.9548</b> | <b>1929.9454</b> | 1930.9294        | 1919.9614 | 1901.9509 | 1902.9344 | 1964.9834 | 1946.9729        | <b>1947.9548</b> | 1963.9756 | 974.4782  | 960.4807  | 982.9917  | S       | 1176.6664 | 1158.6558        | 1159.6394 | 1150.6870 | 1132.6765 | <b>1133.6570</b> | 588.8332  | 575.8435  | 10 |
| 19 | 44.0499  | <b>2018.9923</b> | <b>2000.9821</b> | 2001.9666        | 1990.9985 | 1972.9880 | 1973.9716 | 2036.0205 | 2018.0100        | <b>2018.9923</b> | 2035.0127 | 1009.9968 | 995.9993  | 1018.5103 | A       | 1089.6343 | 1071.6237        | 1072.6073 | 1063.6549 | 1045.6444 | <b>1046.6249</b> | 545.3171  | 532.3275  | 9  |
| 20 | 101.1078 | 2147.0884        | 2129.0779        | 2130.0613        | 2119.0935 | 2101.0828 | 2102.0664 | 2164.1155 | 2146.1047        | 2147.0884        | 2163.1077 | 1074.0442 | 1060.0468 | 1082.5577 | K       | 1018.5972 | 1000.5867        | 1001.5702 | 992.6179  | 974.6073  | <b>975.5872</b>  | 509.7986  | 496.8089  | 8  |
| 21 | 101.1078 | 2275.1833        | 2257.1729        | 2258.1562        | 2247.1885 | 2229.1777 | 2230.1614 | 2292.2104 | 2274.1997        | 2275.1833        | 2291.2026 | 1138.0917 | 1124.0942 | 1146.6052 | K       | 890.5023  | 872.4917         | 873.4752  | 864.5229  | 846.5123  | <b>847.4921</b>  | 445.7511  | 432.7614  | 7  |
| 22 | 136.0761 | 2438.2468        | 2420.2363        | 2421.2197        | 2410.2520 | 2392.2412 | 2393.2249 | 2455.2739 | 2437.2632        | 2438.2468        | 2454.2661 | 1219.6234 | 1205.6260 | 1228.1370 | Y       | 762.4073  | 744.3967         | 745.3802  | 736.4279  | 718.4174  | 719.4009         | 381.7036  | 368.7140  | 6  |
| 23 | 86.0969  | 2551.3308        | 2533.3203        | 2534.3037        | 2523.3359 | 2505.3252 | 2506.3088 | 2568.3579 | <b>2550.3245</b> | 2551.3308        | 2567.3501 | 1276.1654 | 1262.1680 | 1284.6790 | L       | 599.3440  | 581.3334         | 582.3170  | 573.3646  | 555.3541  | 556.3376         | 300.1720  | 287.1823  | 5  |
| 24 | 102.0554 | <b>2680.3706</b> | 2662.3628        | 2663.3462        | 2652.3784 | 2634.3677 | 2635.3513 | 2697.4004 | 2679.3896        | <b>2680.3706</b> | 2696.3926 | 1340.6866 | 1326.6892 | 1349.2002 | E       | 486.2599  | 468.2494         | 469.2329  | 460.2805  | 442.2700  | 443.2536         | 243.6300  | 230.6403  | 4  |
| 25 | 60.0449  | 2767.4055        | 2749.3950        | 2750.3784        | 2739.4106 | 2721.3999 | 2722.3835 | 2784.4326 | 2766.4219        | 2767.4055        | 2783.4248 | 1384.2028 | 1370.2053 | 1392.7163 | S       | 357.2173  | 339.2068         | 340.1903  | 331.2380  | 313.2274  | 314.2110         | 179.1087  | 166.1190  | 3  |
| 26 | 86.0969  | 2880.4895        | <b>2862.4707</b> | <b>2863.4814</b> | 2852.4946 | 2834.4839 | 2835.4675 | 2897.5166 | 2879.5059        | 2880.4895        | 2896.5088 | 1440.7448 | 1426.7473 | 1449.2583 | L       | 270.1853  | 252.1747         | 253.1583  | 244.2059  | 226.1954  | 227.1789         | 135.5927  | 122.6030  | 2  |
| 27 | 85.1169  |                  |                  |                  |           |           |           |           |                  |                  |           |           |           |           | I(-.98) | 157.1012  | 139.0907         | 140.0742  | 131.1219  | 113.1113  | 114.0949         | 79.0506   | 66.0609   | 1  |

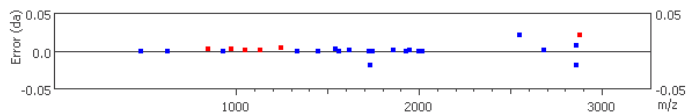

m/z=491.2852

R.YGGFLRRI.R

Error=0.3ppm

Z=2

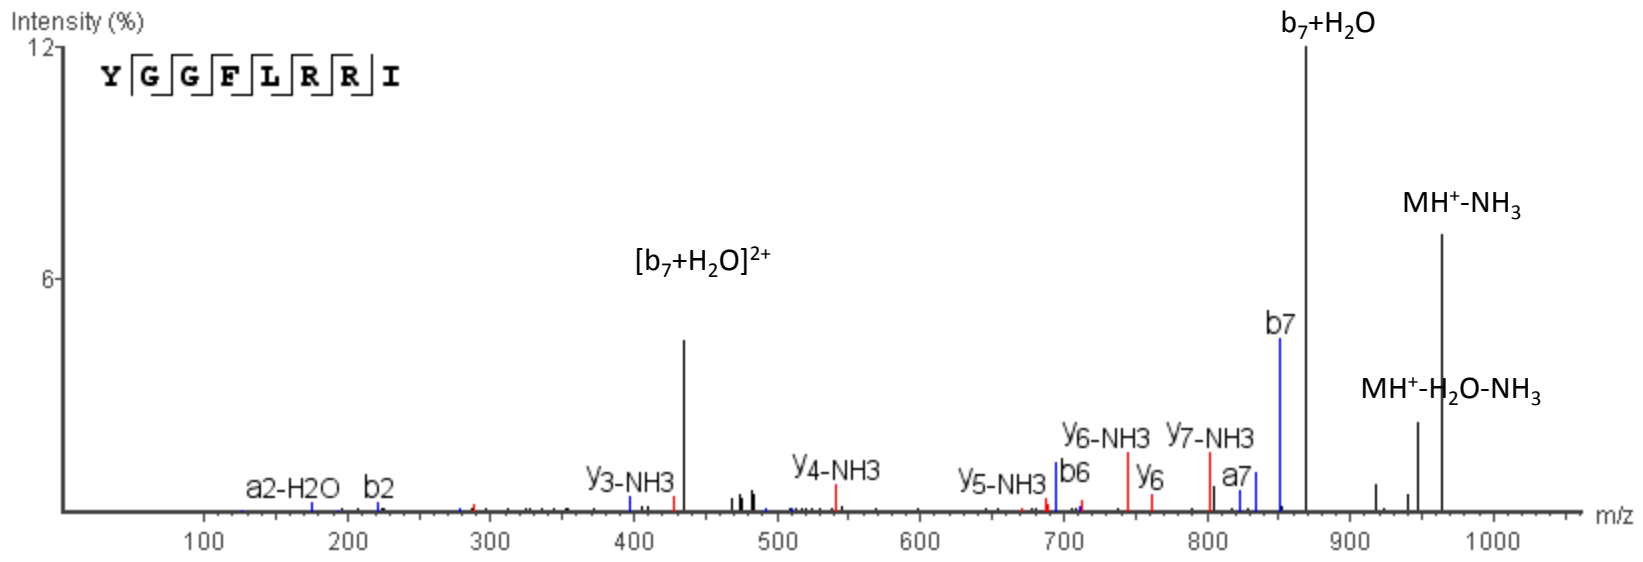

| # | Immonium | b      | b-H2O  | b-NH3  | a      | a-H2O  | a-NH3  | c      | c-H2O  | c-NH3  | b (2+) | a (2+) | c (2+) | Seq | x      | x-H2O  | x-NH3  | y      | y-H2O  | y-NH3  | x (2+) | y (2+) | # |   |
|---|----------|--------|--------|--------|--------|--------|--------|--------|--------|--------|--------|--------|--------|-----|--------|--------|--------|--------|--------|--------|--------|--------|---|---|
| 1 | 136.08   | 164.07 | 146.06 | 147.04 | 136.08 | 118.07 | 119.05 | 181.10 | 163.09 | 164.07 | 82.54  | 68.54  | 91.05  | Y   |        |        |        |        |        |        |        |        |   | 8 |
| 2 | 30.03    | 221.09 | 203.08 | 204.07 | 193.10 | 175.12 | 176.07 | 238.12 | 220.11 | 221.09 | 111.05 | 97.05  | 119.56 | G   | 844.48 | 826.47 | 827.45 | 818.50 | 800.49 | 801.47 | 422.74 | 409.75 | 7 |   |
| 3 | 30.03    | 278.11 | 260.10 | 261.09 | 250.12 | 232.11 | 233.09 | 295.14 | 277.13 | 278.11 | 139.56 | 125.56 | 148.07 | G   | 787.46 | 769.45 | 770.43 | 761.48 | 743.47 | 744.45 | 394.23 | 381.24 | 6 |   |
| 4 | 120.08   | 425.18 | 407.17 | 408.16 | 397.19 | 379.18 | 380.16 | 442.21 | 424.20 | 425.18 | 213.09 | 199.09 | 221.60 | F   | 730.44 | 712.38 | 713.41 | 704.46 | 686.45 | 687.43 | 365.72 | 352.73 | 5 |   |
| 5 | 86.10    | 538.27 | 520.26 | 521.24 | 510.27 | 492.27 | 493.24 | 555.29 | 537.28 | 538.27 | 269.63 | 255.64 | 278.15 | L   | 583.37 | 565.36 | 566.34 | 557.39 | 539.38 | 540.36 | 292.18 | 279.19 | 4 |   |
| 6 | 129.11   | 694.37 | 676.36 | 677.34 | 666.37 | 648.36 | 649.35 | 711.39 | 693.38 | 694.37 | 347.68 | 333.69 | 356.20 | R   | 470.28 | 452.27 | 453.26 | 444.30 | 426.29 | 427.28 | 235.64 | 222.65 | 3 |   |
| 7 | 129.11   | 850.46 | 832.46 | 833.44 | 822.47 | 804.46 | 805.45 | 867.50 | 849.49 | 850.46 | 425.73 | 411.74 | 434.25 | R   | 314.18 | 296.17 | 297.16 | 288.20 | 270.19 | 271.18 | 157.59 | 144.60 | 2 |   |
| 8 | 86.10    |        |        |        |        |        |        |        |        |        |        |        |        | I   | 158.08 | 140.07 | 141.05 | 132.10 | 114.09 | 115.07 | 79.54  | 66.55  | 1 |   |

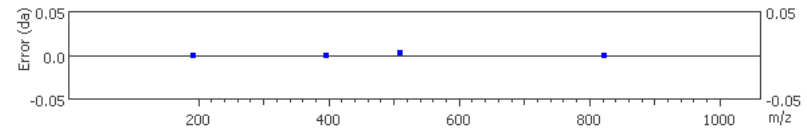

R.PKLKWDNQ.K

m/z=514.7795

Error=-0.5ppm

Z=2

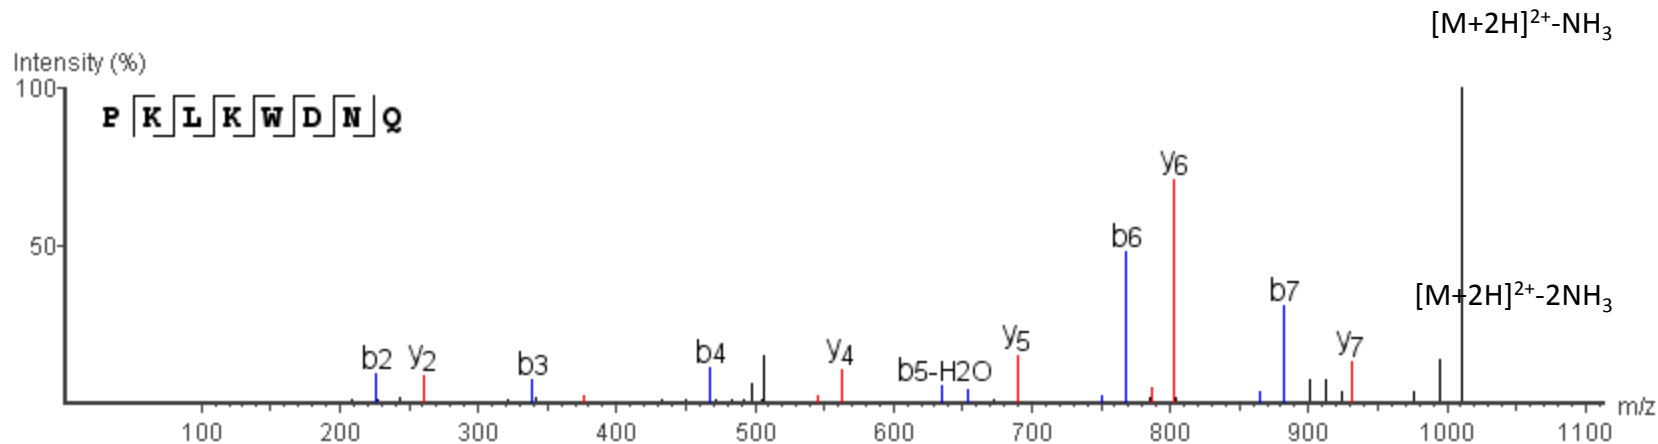

| # | Immonium | b        | b-H2O    | b-NH3    | a        | a-H2O    | a-NH3    | c        | c-H2O    | c-NH3    | c-H      | b (2+)   | a (2+)   | c (2+)   | Seq | x        | x-H2O    | x-NH3    | y        | y-H2O    | y-NH3    | x (2+)   | y (2+)   | # |   |
|---|----------|----------|----------|----------|----------|----------|----------|----------|----------|----------|----------|----------|----------|----------|-----|----------|----------|----------|----------|----------|----------|----------|----------|---|---|
| 1 | 70.0656  | 98.0606  | 80.0500  | 81.0336  | 70.0656  | 52.0550  | 53.0386  | 115.0876 | 97.0770  | 98.0606  | 114.0798 | 49.5303  | 35.5328  | 58.0438  | P   |          |          |          |          |          |          |          |          |   | 8 |
| 2 | 101.1078 | 226.1554 | 208.1450 | 209.1285 | 198.1605 | 180.1500 | 181.1335 | 243.1825 | 225.1720 | 226.1554 | 242.1747 | 113.5778 | 99.5803  | 122.0913 | K   | 957.4789 | 939.4684 | 940.4519 | 931.4993 | 913.4890 | 914.4726 | 479.2395 | 466.2498 | 7 |   |
| 3 | 86.0969  | 339.2395 | 321.2290 | 322.2126 | 311.2446 | 293.2340 | 294.2176 | 356.2666 | 338.2560 | 339.2395 | 355.2588 | 170.1198 | 156.1223 | 178.6333 | L   | 829.3840 | 811.3734 | 812.3569 | 803.4041 | 785.3940 | 786.3767 | 415.1920 | 402.2023 | 6 |   |
| 4 | 101.1078 | 467.3339 | 449.3240 | 450.3076 | 439.3395 | 421.3290 | 422.3126 | 484.3615 | 466.3510 | 467.3339 | 483.3537 | 234.1673 | 220.1698 | 242.6808 | K   | 716.2999 | 698.2894 | 699.2729 | 690.3203 | 672.3100 | 673.2936 | 358.6500 | 345.6603 | 5 |   |
| 5 | 159.0921 | 653.4133 | 635.4037 | 636.3869 | 625.4189 | 607.4083 | 608.3919 | 670.4409 | 652.4304 | 653.4133 | 669.4330 | 327.2069 | 313.2094 | 335.7205 | W   | 588.2050 | 570.1944 | 571.1780 | 562.2253 | 544.2150 | 545.1990 | 294.6025 | 281.6128 | 4 |   |
| 6 | 88.0398  | 768.4399 | 750.4305 | 751.4138 | 740.4458 | 722.4352 | 723.4188 | 785.4678 | 767.4573 | 768.4399 | 784.4600 | 384.7204 | 370.7229 | 393.2339 | D   | 402.1256 | 384.1151 | 385.0966 | 376.1469 | 358.1357 | 359.1193 | 201.5628 | 188.5731 | 3 |   |
| 7 | 87.0558  | 882.4835 | 864.4731 | 865.4551 | 854.4887 | 836.4781 | 837.4617 | 899.5107 | 881.5002 | 882.4835 | 898.5029 | 441.7419 | 427.7444 | 450.2554 | N   | 287.0987 | 269.0881 | 270.0717 | 261.1198 | 243.1088 | 244.0933 | 144.0493 | 131.0597 | 2 |   |
| 8 | 101.0714 |          |          |          |          |          |          |          |          |          |          |          |          |          | Q   | 173.0558 | 155.0452 | 156.0288 | 147.0764 | 129.0659 | 130.0494 | 87.0279  | 74.0382  | 1 |   |

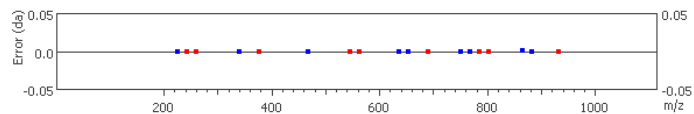

R.YGGFLRRQFKVVT.R

m/z=524.3

Error=0.1ppm

Z=3

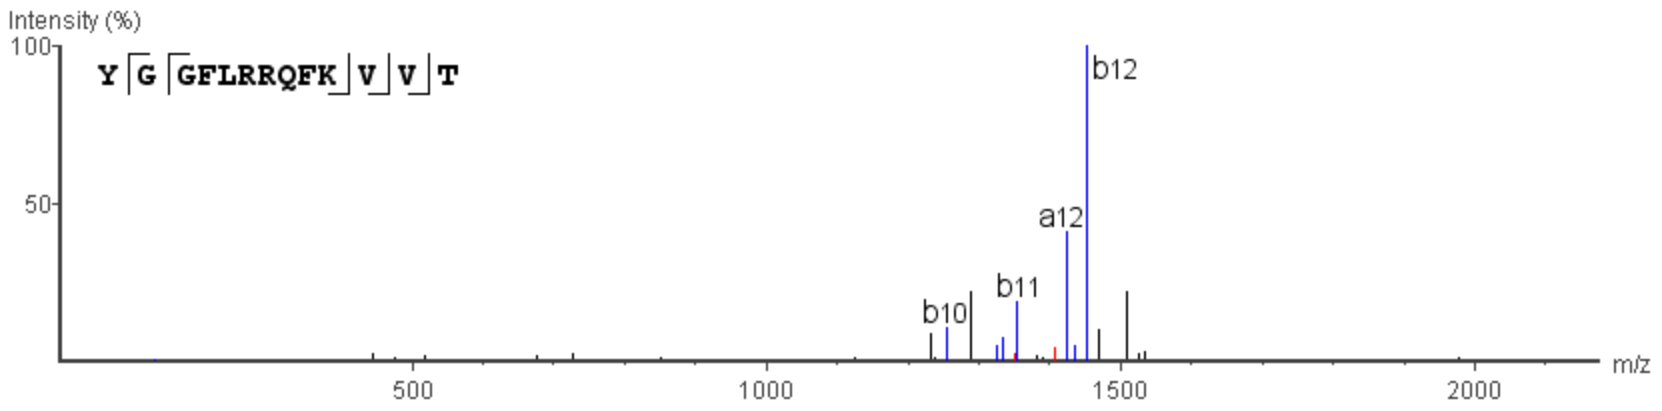

| #  | Immonium | b         | b-H2O     | b-NH3     | a         | a-H2O     | a-NH3     | c         | c-H2O     | c-NH3     | c-H       | b(2+)    | a(2+)    | c(2+)    | Seq | x         | x-H2O     | x-NH3     | y         | y-H2O     | y-NH3     | x(2+)    | y(2+)    | #  |    |
|----|----------|-----------|-----------|-----------|-----------|-----------|-----------|-----------|-----------|-----------|-----------|----------|----------|----------|-----|-----------|-----------|-----------|-----------|-----------|-----------|----------|----------|----|----|
| 1  | 136.0761 | 164.0712  | 146.0606  | 147.0441  | 136.0761  | 118.0656  | 119.0491  | 181.0981  | 163.0876  | 164.0712  | 180.0903  | 82.5356  | 68.5381  | 91.0491  | Y   |           |           |           |           |           |           |          |          |    | 13 |
| 2  | 30.0343  | 221.0926  | 203.0820  | 204.0656  | 193.0976  | 175.0870  | 176.0706  | 238.1196  | 220.1090  | 221.0926  | 237.1118  | 111.0463 | 97.0488  | 119.5598 | G   | 1433.8013 | 1415.7906 | 1416.7743 | 1407.8204 | 1389.8114 | 1390.7949 | 717.4006 | 704.4109 | 12 |    |
| 3  | 30.0343  | 278.1141  | 260.1035  | 261.0871  | 250.1191  | 232.1085  | 233.0921  | 295.1411  | 277.1305  | 278.1141  | 294.1333  | 139.5570 | 125.5595 | 148.0705 | G   | 1376.7798 | 1358.7692 | 1359.7528 | 1350.7976 | 1332.7899 | 1333.7734 | 688.8899 | 675.9002 | 11 |    |
| 4  | 120.0812 | 425.1825  | 407.1719  | 408.1555  | 397.1875  | 379.1769  | 380.1605  | 442.2095  | 424.1989  | 425.1825  | 441.2017  | 213.0912 | 199.0937 | 221.6047 | F   | 1319.7583 | 1301.7477 | 1302.7313 | 1293.7789 | 1275.7684 | 1276.7520 | 660.3792 | 647.3895 | 10 |    |
| 5  | 86.0969  | 538.2665  | 520.2560  | 521.2396  | 510.2715  | 492.2610  | 493.2446  | 555.2936  | 537.2830  | 538.2665  | 554.2857  | 269.6333 | 255.6358 | 278.1468 | L   | 1172.6899 | 1154.6793 | 1155.6630 | 1146.7106 | 1128.7001 | 1129.6836 | 586.8450 | 573.8553 | 9  |    |
| 6  | 129.1139 | 694.3676  | 676.3571  | 677.3406  | 666.3726  | 648.3621  | 649.3456  | 711.3947  | 693.3841  | 694.3676  | 710.3868  | 347.6838 | 333.6863 | 356.1973 | R   | 1059.6058 | 1041.5952 | 1042.5789 | 1033.6265 | 1015.6159 | 1016.5995 | 530.3029 | 517.3132 | 8  |    |
| 7  | 129.1139 | 850.4688  | 832.4582  | 833.4418  | 822.4738  | 804.4632  | 805.4468  | 867.4958  | 849.4852  | 850.4688  | 866.4679  | 425.7344 | 411.7369 | 434.2479 | R   | 903.5048  | 885.4942  | 886.4778  | 877.5254  | 859.5148  | 860.4984  | 452.2524 | 439.2627 | 7  |    |
| 8  | 101.0714 | 978.5273  | 960.5168  | 961.5004  | 950.5323  | 932.5218  | 933.5054  | 995.5544  | 977.5438  | 978.5273  | 994.5465  | 489.7637 | 475.7662 | 498.2772 | Q   | 747.4036  | 729.3931  | 730.3766  | 721.4243  | 703.4137  | 704.3973  | 374.2018 | 361.2121 | 6  |    |
| 9  | 120.0812 | 1125.5957 | 1107.5852 | 1108.5687 | 1097.6007 | 1079.5902 | 1080.5737 | 1142.6227 | 1124.6122 | 1125.5957 | 1141.6149 | 563.2979 | 549.3004 | 571.8113 | F   | 619.3451  | 601.3345  | 602.3181  | 593.3657  | 575.3552  | 576.3387  | 310.1725 | 297.1829 | 5  |    |
| 10 | 101.1078 | 1253.6901 | 1235.6802 | 1236.6637 | 1225.6957 | 1207.6852 | 1208.6687 | 1270.7177 | 1252.7072 | 1253.6901 | 1269.7098 | 627.3453 | 613.3478 | 635.8588 | K   | 472.2767  | 454.2661  | 455.2497  | 446.2973  | 428.2867  | 429.2703  | 236.6383 | 223.6487 | 4  |    |
| 11 | 72.0812  | 1352.7574 | 1334.7451 | 1335.7321 | 1324.7620 | 1306.7535 | 1307.7371 | 1369.7860 | 1351.7755 | 1352.7574 | 1368.7782 | 676.8795 | 662.8820 | 685.3930 | V   | 344.1817  | 326.1711  | 327.1547  | 318.2023  | 300.1918  | 301.1754  | 172.5909 | 159.6012 | 3  |    |
| 12 | 72.0812  | 1451.8246 | 1433.8170 | 1434.7975 | 1423.8298 | 1405.8220 | 1406.8031 | 1468.8545 | 1450.8440 | 1451.8246 | 1467.8467 | 726.4138 | 712.4163 | 734.9272 | V   | 245.1133  | 227.1027  | 228.0863  | 219.1339  | 201.1234  | 202.1069  | 123.0566 | 110.0670 | 2  |    |
| 13 | 74.0605  |           |           |           |           |           |           |           |           |           |           |          |          |          | T   | 146.0449  | 128.0343  | 129.0179  | 120.0655  | 102.0550  | 103.0385  | 73.5224  | 60.5328  | 1  |    |

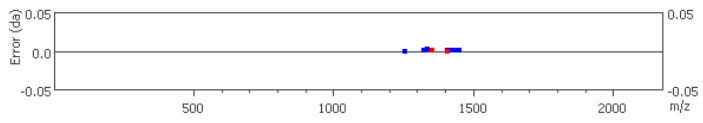

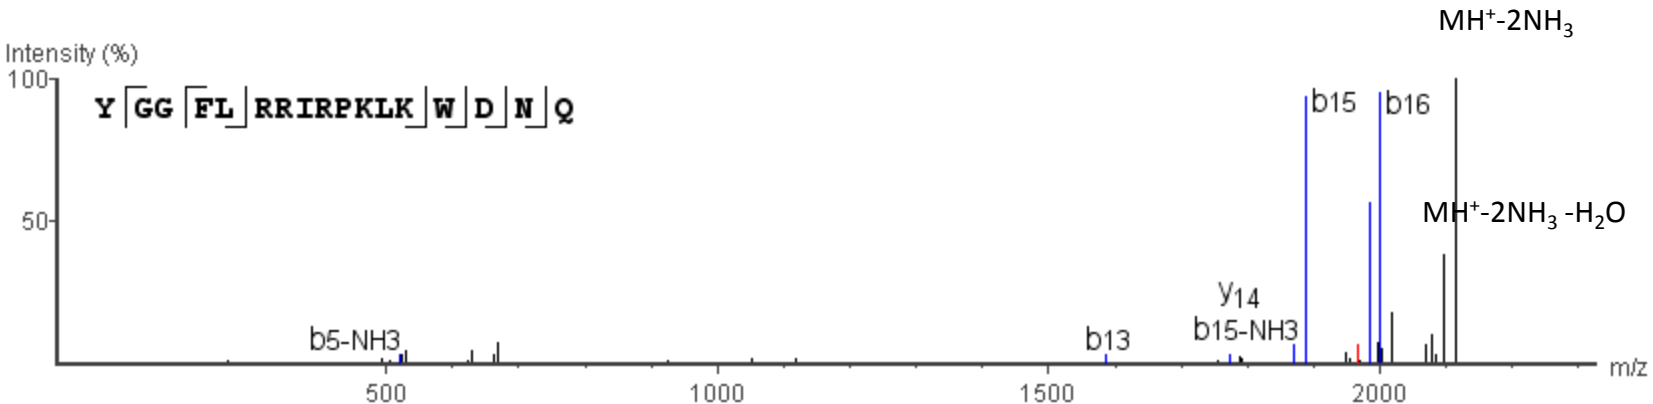

| #  | Immonium | b       | b-H2O   | b-NH3   | a       | a-H2O   | a-NH3   | c       | c-H2O   | c-NH3   | b (2+)  | a (2+) | c (2+)  | Seq | x       | x-H2O   | x-NH3   | y       | y-H2O   | y-NH3   | x (2+)  | y (2+) | #  |
|----|----------|---------|---------|---------|---------|---------|---------|---------|---------|---------|---------|--------|---------|-----|---------|---------|---------|---------|---------|---------|---------|--------|----|
| 1  | 136.08   | 164.07  | 146.06  | 147.04  | 136.08  | 118.07  | 119.05  | 181.10  | 163.09  | 164.07  | 82.54   | 68.54  | 91.05   | Y   |         |         |         |         |         |         |         |        | 17 |
| 2  | 30.03    | 221.09  | 203.08  | 204.07  | 193.10  | 175.09  | 176.07  | 238.12  | 220.11  | 221.09  | 111.05  | 97.05  | 119.56  | G   | 2010.11 | 1992.10 | 1993.09 | 1984.10 | 1966.12 | 1967.10 | 1005.56 | 992.57 | 16 |
| 3  | 30.03    | 278.11  | 260.10  | 261.09  | 250.12  | 232.11  | 233.09  | 295.14  | 277.13  | 278.11  | 139.56  | 125.56 | 148.07  | G   | 1953.09 | 1935.08 | 1936.07 | 1927.11 | 1909.10 | 1910.09 | 977.05  | 964.06 | 15 |
| 4  | 120.08   | 425.18  | 407.17  | 408.16  | 397.19  | 379.18  | 380.16  | 442.21  | 424.20  | 425.18  | 213.09  | 199.09 | 221.60  | F   | 1896.07 | 1878.06 | 1879.04 | 1870.07 | 1852.08 | 1853.07 | 948.54  | 935.55 | 14 |
| 5  | 86.10    | 538.27  | 520.26  | 521.20  | 510.27  | 492.26  | 493.24  | 555.29  | 537.28  | 538.27  | 269.63  | 255.64 | 278.15  | L   | 1749.00 | 1730.99 | 1731.98 | 1723.02 | 1705.01 | 1706.00 | 875.00  | 862.01 | 13 |
| 6  | 129.11   | 694.37  | 676.36  | 677.34  | 666.37  | 648.36  | 649.35  | 711.39  | 693.38  | 694.37  | 347.68  | 333.69 | 356.20  | R   | 1635.92 | 1617.91 | 1618.89 | 1609.94 | 1591.93 | 1592.91 | 818.46  | 805.47 | 12 |
| 7  | 129.11   | 850.47  | 832.46  | 833.44  | 822.47  | 804.46  | 805.45  | 867.50  | 849.49  | 850.47  | 425.73  | 411.74 | 434.25  | R   | 1479.82 | 1461.81 | 1462.79 | 1453.84 | 1435.83 | 1436.81 | 740.41  | 727.42 | 11 |
| 8  | 86.10    | 963.55  | 945.54  | 946.53  | 935.56  | 917.55  | 918.53  | 980.58  | 962.57  | 963.55  | 482.28  | 468.28 | 490.79  | I   | 1323.72 | 1305.71 | 1306.69 | 1297.74 | 1279.73 | 1280.71 | 662.36  | 649.37 | 10 |
| 9  | 129.11   | 1119.65 | 1101.64 | 1102.63 | 1091.66 | 1073.65 | 1074.63 | 1136.68 | 1118.67 | 1119.65 | 560.33  | 546.33 | 568.84  | R   | 1210.63 | 1192.62 | 1193.61 | 1184.65 | 1166.64 | 1167.63 | 605.82  | 592.83 | 9  |
| 10 | 70.07    | 1216.71 | 1198.70 | 1199.68 | 1188.71 | 1170.70 | 1171.68 | 1233.73 | 1215.72 | 1216.71 | 608.85  | 594.86 | 617.37  | P   | 1054.53 | 1036.52 | 1037.50 | 1028.55 | 1010.54 | 1011.53 | 527.77  | 514.78 | 8  |
| 11 | 101.11   | 1344.80 | 1326.79 | 1327.77 | 1316.81 | 1298.80 | 1299.78 | 1361.83 | 1343.82 | 1344.80 | 672.90  | 658.90 | 681.41  | K   | 957.48  | 939.47  | 940.45  | 931.50  | 913.49  | 914.47  | 479.24  | 466.25 | 7  |
| 12 | 86.10    | 1457.89 | 1439.88 | 1440.86 | 1429.89 | 1411.88 | 1412.86 | 1474.91 | 1456.90 | 1457.89 | 729.44  | 715.45 | 737.96  | L   | 829.38  | 811.37  | 812.36  | 803.40  | 785.39  | 786.38  | 415.19  | 402.20 | 6  |
| 13 | 101.11   | 1585.98 | 1567.97 | 1568.95 | 1557.99 | 1539.98 | 1540.96 | 1603.01 | 1585.00 | 1585.98 | 793.49  | 779.49 | 802.00  | K   | 716.30  | 698.29  | 699.27  | 690.32  | 672.31  | 673.29  | 358.65  | 345.66 | 5  |
| 14 | 159.09   | 1772.06 | 1754.05 | 1755.03 | 1744.06 | 1726.05 | 1727.04 | 1789.09 | 1771.08 | 1772.06 | 886.53  | 872.53 | 895.04  | W   | 588.20  | 570.19  | 571.18  | 562.23  | 544.22  | 545.20  | 294.60  | 281.61 | 4  |
| 15 | 88.04    | 1887.09 | 1869.08 | 1870.07 | 1859.09 | 1841.08 | 1842.06 | 1904.11 | 1886.10 | 1887.09 | 944.04  | 930.05 | 952.56  | D   | 402.13  | 384.12  | 385.10  | 376.15  | 358.14  | 359.12  | 201.56  | 188.57 | 3  |
| 16 | 87.06    | 2001.13 | 1983.12 | 1984.10 | 1973.13 | 1955.12 | 1956.11 | 2018.16 | 2000.15 | 2001.13 | 1001.06 | 987.07 | 1009.58 | N   | 287.10  | 269.09  | 270.07  | 261.12  | 243.11  | 244.09  | 144.05  | 131.06 | 2  |
| 17 | 101.07   |         |         |         |         |         |         |         |         |         |         |        |         | Q   | 173.06  | 155.05  | 156.03  | 147.08  | 129.07  | 130.05  | 87.03   | 74.04  | 1  |

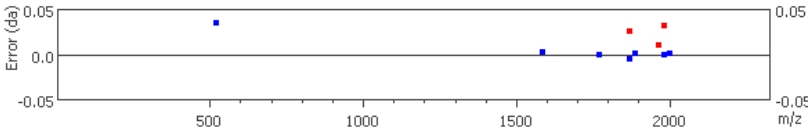

Supplement: supp_M112.024828_mcp.M112.024828-3.pdf [file supp_M112.024828_mcp.M112.024828-3.pdf]
