# Supplementary material
Source: PubMed Central journal article supplement (PMC3675813)

(2) Sequence assignments of peptides with PTMs

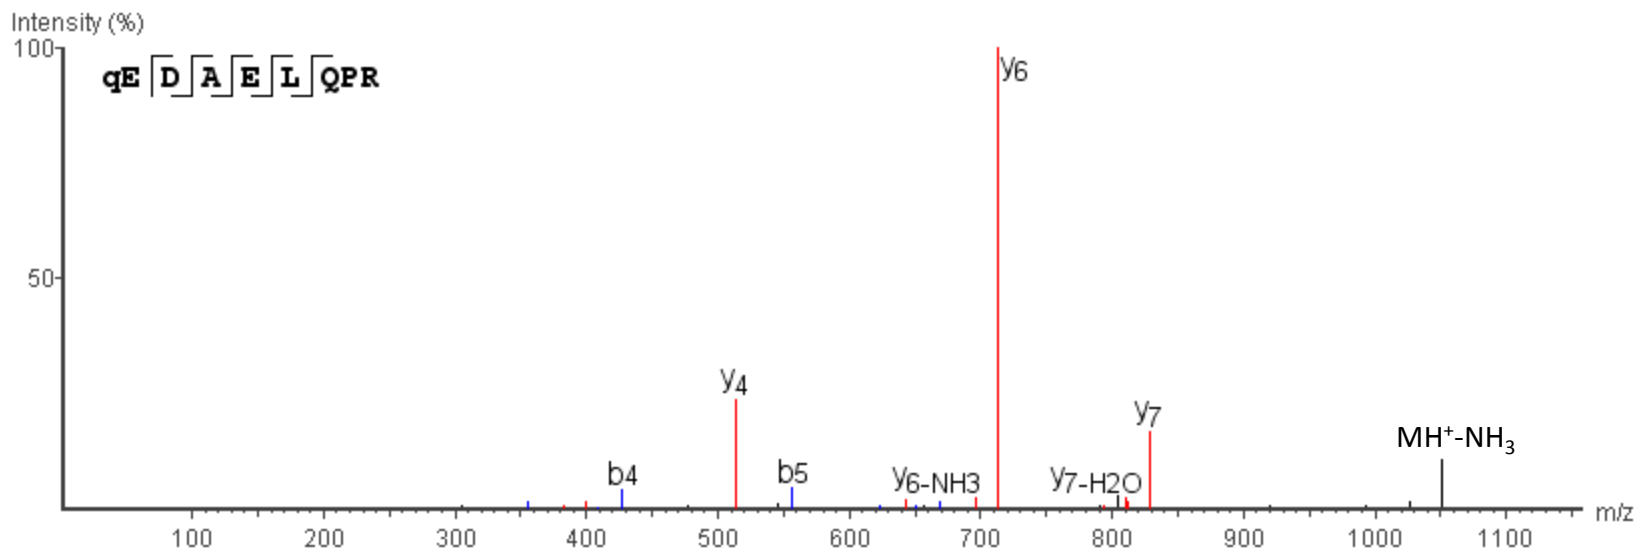

| # | Immonium | b        | b-H2O    | b-NH3    | a        | a-H2O    | a-NH3    | c        | c-H2O    | c-NH3    | c-H      | b(2+)    | a(2+)    | c(2+)    | Seq       | x        | x-H2O    | x-NH3    | y        | y-H2O    | y-NH3    | x(2+)    | y(2+)    | # |   |
|---|----------|----------|----------|----------|----------|----------|----------|----------|----------|----------|----------|----------|----------|----------|-----------|----------|----------|----------|----------|----------|----------|----------|----------|---|---|
| 1 | 84.0414  | 112.0364 | 94.0258  | 95.0094  | 84.0414  | 66.0308  | 67.0144  | 129.0634 | 111.0528 | 112.0364 | 128.0556 | 56.5182  | 42.5207  | 65.0317  | Q(-17.03) |          |          |          |          |          |          |          |          |   | 9 |
| 2 | 102.0554 | 241.0790 | 223.0684 | 224.0520 | 213.0840 | 195.0734 | 196.0570 | 258.1060 | 240.0954 | 241.0790 | 257.0982 | 121.0395 | 107.0420 | 129.5530 | E         | 983.4429 | 965.4324 | 966.4159 | 957.4636 | 939.4530 | 940.4366 | 492.2215 | 479.2318 | 8 |   |
| 3 | 88.0398  | 356.1059 | 338.0954 | 339.0789 | 328.1109 | 310.1004 | 311.0839 | 373.1329 | 355.1224 | 356.1059 | 372.1251 | 178.5530 | 164.5555 | 187.0665 | D         | 854.4003 | 836.3898 | 837.3733 | 828.4207 | 810.4098 | 811.3940 | 427.7002 | 414.7105 | 7 |   |
| 4 | 44.0499  | 427.1459 | 409.1325 | 410.1161 | 399.1480 | 381.1375 | 382.1210 | 444.1700 | 426.1595 | 427.1459 | 443.1622 | 214.0715 | 200.0740 | 222.5850 | A         | 739.3734 | 721.3629 | 722.3464 | 713.3937 | 695.3835 | 696.3671 | 370.1867 | 357.1970 | 6 |   |
| 5 | 102.0554 | 556.1884 | 538.1750 | 539.1586 | 528.1906 | 510.1801 | 511.1636 | 573.2126 | 555.2021 | 556.1884 | 572.2048 | 278.5928 | 264.5953 | 287.1063 | E         | 668.3363 | 650.3257 | 651.3093 | 642.3569 | 624.3464 | 625.3300 | 334.6682 | 321.6785 | 5 |   |
| 6 | 86.0969  | 669.2697 | 651.2591 | 652.2427 | 641.2747 | 623.2641 | 624.2477 | 686.2967 | 668.2861 | 669.2697 | 685.2888 | 335.1348 | 321.1373 | 343.6483 | L         | 539.2937 | 521.2831 | 522.2667 | 513.3142 | 495.3038 | 496.2874 | 270.1469 | 257.1572 | 4 |   |
| 7 | 101.0714 | 797.3282 | 779.3177 | 780.3013 | 769.3333 | 751.3227 | 752.3063 | 814.3553 | 796.3447 | 797.3282 | 813.3474 | 399.1641 | 385.1666 | 407.6776 | Q         | 426.2096 | 408.1991 | 409.1826 | 400.2303 | 382.2197 | 383.2033 | 213.6048 | 200.6151 | 3 |   |
| 8 | 70.0656  | 894.3810 | 876.3704 | 877.3540 | 866.3860 | 848.3754 | 849.3590 | 911.4080 | 893.3975 | 894.3810 | 910.4001 | 447.6905 | 433.6930 | 456.2040 | P         | 298.1511 | 280.1405 | 281.1241 | 272.1717 | 254.1611 | 255.1447 | 149.5755 | 136.5858 | 2 |   |
| 9 | 129.1139 |          |          |          |          |          |          |          |          |          |          |          |          |          | R         | 201.0983 | 183.0877 | 184.0713 | 175.1189 | 157.1084 | 158.0919 | 101.0491 | 88.0595  | 1 |   |

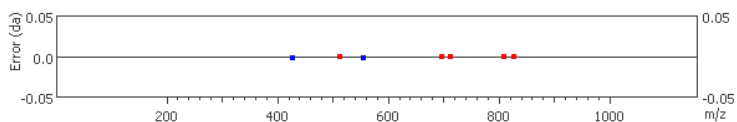

R.Q(-17.03)ERPPLQQPPHRD.K

m/z=527.6022

Error=-0.3ppm

Z=3

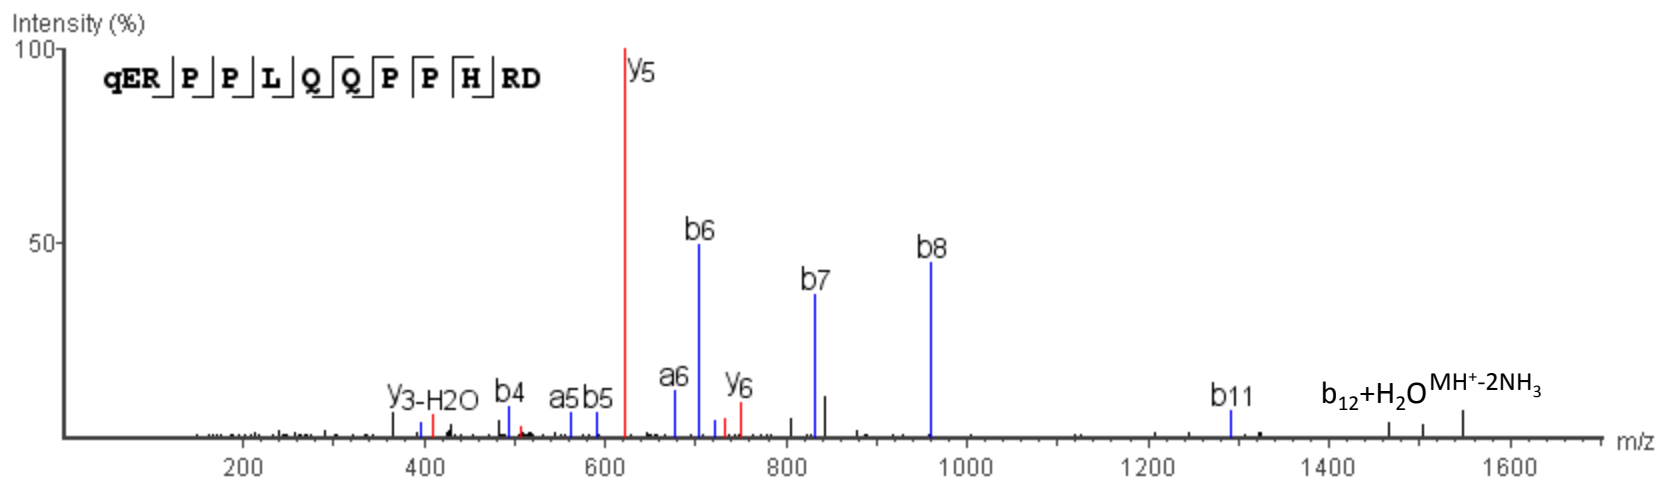

| #  | Immonium | b                | b-H2O     | b-NH3     | a               | a-H2O     | a-NH3     | c               | c-H2O     | c-NH3            | c-H       | b (2+)   | a (2+)   | c (2+)   | Seq       | x         | x-H2O     | x-NH3     | y               | y-H2O           | y-NH3           | x (2+)   | y (2+)   | #  |    |
|----|----------|------------------|-----------|-----------|-----------------|-----------|-----------|-----------------|-----------|------------------|-----------|----------|----------|----------|-----------|-----------|-----------|-----------|-----------------|-----------------|-----------------|----------|----------|----|----|
| 1  | 84.0414  | 112.0364         | 94.0258   | 95.0094   | 84.0414         | 66.0308   | 67.0144   | 129.0634        | 111.0528  | 112.0364         | 128.0556  | 56.5182  | 42.5207  | 65.0317  | Q(-17.03) |           |           |           |                 |                 |                 |          |          |    | 13 |
| 2  | 102.0554 | 241.0790         | 223.0684  | 224.0520  | 213.0840        | 195.0734  | 196.0570  | 258.1060        | 240.0954  | 241.0790         | 257.0982  | 121.0395 | 107.0420 | 129.5530 | E         | 1495.7401 | 1477.7295 | 1478.7131 | 1469.7607       | 1451.7502       | 1452.7338       | 748.3701 | 735.3804 | 12 |    |
| 3  | 129.1139 | <b>397.1828</b>  | 379.1695  | 380.1531  | 369.1851        | 351.1745  | 352.1581  | 414.2071        | 396.1965  | <b>397.1828</b>  | 413.1993  | 199.0900 | 185.0925 | 207.6035 | R         | 1366.6975 | 1348.6869 | 1349.6705 | 1340.7181       | 1322.7076       | 1323.6912       | 683.8488 | 670.8591 | 11 |    |
| 4  | 70.0656  | <b>494.2347</b>  | 476.2223  | 477.2059  | 466.2379        | 448.2273  | 449.2109  | 511.2599        | 493.2493  | <b>494.2347</b>  | 510.2520  | 247.6164 | 233.6189 | 256.1299 | P         | 1210.5964 | 1192.5858 | 1193.5695 | 1184.6171       | 1166.6066       | 1167.5901       | 605.7982 | 592.8085 | 10 |    |
| 5  | 70.0656  | <b>591.2878</b>  | 573.2750  | 574.2586  | <b>563.2946</b> | 545.2800  | 546.2636  | 608.3126        | 590.3021  | <b>591.2878</b>  | 607.3047  | 296.1428 | 282.1453 | 304.6563 | P         | 1113.5436 | 1095.5330 | 1096.5166 | 1087.5642       | 1069.5537       | 1070.5372       | 557.2718 | 544.2821 | 9  |    |
| 6  | 86.0969  | <b>704.3711</b>  | 686.3591  | 687.3427  | <b>676.3767</b> | 658.3641  | 659.3477  | <b>721.3976</b> | 703.3861  | <b>704.3711</b>  | 720.3888  | 352.6848 | 338.6873 | 361.1983 | L         | 1016.4909 | 998.4803  | 999.4639  | 990.5115        | 972.5010        | 973.4846        | 508.7455 | 495.7558 | 8  |    |
| 7  | 101.0714 | <b>832.4302</b>  | 814.4177  | 815.4012  | 804.4332        | 786.4227  | 787.4062  | 849.4553        | 831.4447  | <b>832.4302</b>  | 848.4474  | 416.7141 | 402.7166 | 425.2276 | Q         | 903.4068  | 885.3962  | 886.3798  | 877.4274        | 859.4169        | 860.4005        | 452.2034 | 439.2137 | 7  |    |
| 8  | 101.0714 | <b>960.4878</b>  | 942.4763  | 943.4598  | 932.4918        | 914.4813  | 915.4648  | 977.5139        | 959.5033  | <b>960.4878</b>  | 976.5060  | 480.7434 | 466.7459 | 489.2569 | Q         | 775.3483  | 757.3377  | 758.3213  | <b>749.3682</b> | 731.3583        | <b>732.3407</b> | 388.1741 | 375.1844 | 6  |    |
| 9  | 70.0656  | 1057.5396        | 1039.5291 | 1040.5126 | 1029.5446       | 1011.5340 | 1012.5176 | 1074.5665       | 1056.5560 | 1057.5396        | 1073.5587 | 529.2698 | 515.2723 | 537.7833 | P         | 647.2897  | 629.2791  | 630.2627  | <b>621.3092</b> | 603.2997        | 604.2833        | 324.1448 | 311.1552 | 5  |    |
| 10 | 70.0656  | 1154.5923        | 1136.5818 | 1137.5653 | 1126.5973       | 1108.5868 | 1109.5703 | 1171.6193       | 1153.6088 | 1154.5923        | 1170.6115 | 577.7961 | 563.7986 | 586.3096 | P         | 550.2369  | 532.2263  | 533.2099  | 524.2576        | <b>506.2825</b> | 507.2306        | 275.6184 | 262.6288 | 4  |    |
| 11 | 110.0717 | <b>1291.6530</b> | 1273.6407 | 1274.6243 | 1263.6562       | 1245.6458 | 1246.6293 | 1308.6782       | 1290.6677 | <b>1291.6530</b> | 1307.6704 | 646.3256 | 632.3281 | 654.8391 | H         | 453.1841  | 435.1736  | 436.1571  | 427.2048        | <b>409.2301</b> | 410.1778        | 227.0921 | 214.1024 | 3  |    |
| 12 | 129.1139 | 1447.7523        | 1429.7418 | 1430.7253 | 1419.7573       | 1401.7468 | 1402.7303 | 1464.7793       | 1446.7688 | 1447.7523        | 1463.7715 | 724.3762 | 710.3787 | 732.8896 | R         | 316.1252  | 298.1147  | 299.0982  | 290.1459        | 272.1353        | 273.1189        | 158.5626 | 145.5729 | 2  |    |
| 13 | 88.0398  |                  |           |           |                 |           |           |                 |           |                  |           |          |          |          | D         | 160.0241  | 142.0136  | 142.9971  | 134.0448        | 116.0342        | 117.0178        | 80.5121  | 67.5224  | 1  |    |

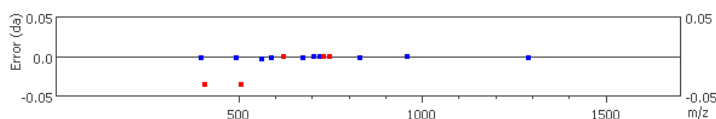

R.Q(-17.03)LYENKPRRP(-.98).Y

m/z=428.2388

Z=3

Error=0.3ppm

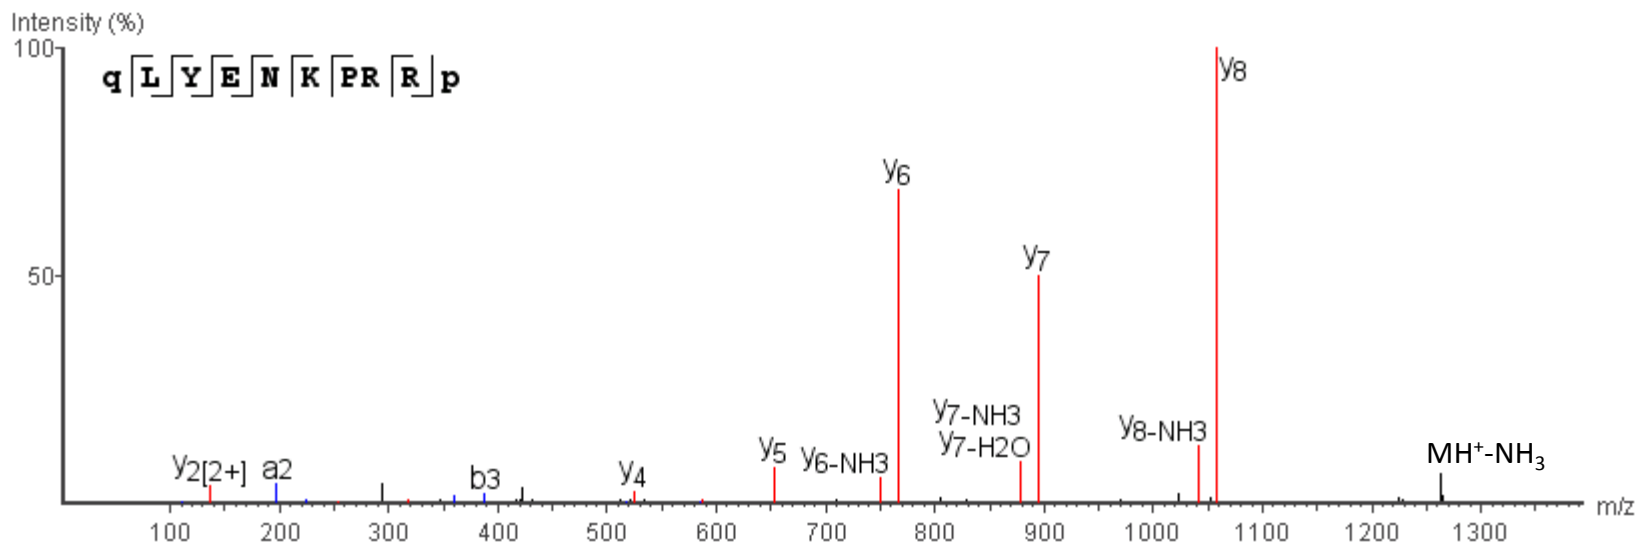

| #  | Immonium | b         | b-H2O     | b-NH3     | a         | a-H2O     | a-NH3     | c         | c-H2O     | c-NH3     | c-H       | b (2+)   | a (2+)   | c (2+)   | Seq       | x         | x-H2O     | x-NH3     | y         | y-H2O     | y-NH3     | x (2+)   | y (2+)   | # |    |
|----|----------|-----------|-----------|-----------|-----------|-----------|-----------|-----------|-----------|-----------|-----------|----------|----------|----------|-----------|-----------|-----------|-----------|-----------|-----------|-----------|----------|----------|---|----|
| 1  | 84.0414  | 112.0364  | 94.0258   | 95.0094   | 84.0414   | 66.0308   | 67.0144   | 129.0634  | 111.0528  | 112.0364  | 128.0556  | 56.5182  | 42.5207  | 65.0317  | Q(-17.03) |           |           |           |           |           |           |          |          |   | 10 |
| 2  | 86.0969  | 225.1205  | 207.1099  | 208.0935  | 197.1287  | 179.1149  | 180.0985  | 242.1475  | 224.1369  | 225.1205  | 241.1396  | 113.0602 | 99.0627  | 121.5737 | L         | 1197.6527 | 1179.6421 | 1180.6257 | 1171.6733 | 1153.6628 | 1154.6464 | 599.3264 | 586.3367 | 9 |    |
| 3  | 136.0754 | 388.1866  | 370.1732  | 371.1568  | 360.1888  | 342.1782  | 343.1618  | 405.2108  | 387.2002  | 388.1866  | 404.2030  | 194.5919 | 180.5944 | 203.1054 | Y         | 1084.5687 | 1066.5581 | 1067.5417 | 1058.5848 | 1040.5789 | 1041.5560 | 542.7844 | 529.7947 | 8 |    |
| 4  | 102.0554 | 517.2264  | 499.2158  | 500.1994  | 489.2314  | 471.2208  | 472.2044  | 534.2534  | 516.2429  | 517.2264  | 533.2455  | 259.1132 | 245.1157 | 267.6267 | E         | 921.5054  | 903.4948  | 904.4784  | 895.5208  | 877.4922  | 878.4952  | 461.2527 | 448.2630 | 7 |    |
| 5  | 87.0558  | 631.2693  | 613.2587  | 614.2423  | 603.2743  | 585.2637  | 586.2473  | 648.2963  | 630.2858  | 631.2693  | 647.2885  | 316.1346 | 302.1371 | 324.6482 | N         | 792.4628  | 774.4522  | 775.4358  | 766.4797  | 748.4728  | 749.4532  | 396.7314 | 383.7417 | 6 |    |
| 6  | 101.1078 | 759.3643  | 741.3537  | 742.3373  | 731.3693  | 713.3587  | 714.3423  | 776.3913  | 758.3807  | 759.3643  | 775.3834  | 380.1821 | 366.1846 | 388.6956 | K         | 678.4199  | 660.4093  | 661.3928  | 652.4369  | 634.4299  | 635.4135  | 339.7099 | 326.7202 | 5 |    |
| 7  | 70.0656  | 856.4170  | 838.4064  | 839.3900  | 828.4220  | 810.4114  | 811.3950  | 873.4440  | 855.4335  | 856.4170  | 872.4362  | 428.7085 | 414.7110 | 437.2220 | P         | 550.3249  | 532.3143  | 533.2979  | 524.3419  | 506.3350  | 507.3186  | 275.6624 | 262.6728 | 4 |    |
| 8  | 129.1139 | 1012.5181 | 994.5076  | 995.4911  | 984.5231  | 966.5126  | 967.4962  | 1029.5452 | 1011.5346 | 1012.5181 | 1028.5374 | 506.7591 | 492.7616 | 515.2726 | R         | 453.2722  | 435.2616  | 436.2451  | 427.2928  | 409.2822  | 410.2658  | 227.1361 | 214.1464 | 3 |    |
| 9  | 129.1139 | 1168.6193 | 1150.6088 | 1151.5923 | 1140.6243 | 1122.6138 | 1123.5973 | 1185.6462 | 1167.6357 | 1168.6193 | 1184.6384 | 584.8096 | 570.8121 | 593.3231 | R         | 297.1711  | 279.1605  | 280.1440  | 271.1917  | 253.1811  | 254.1647  | 149.0855 | 136.0754 | 2 |    |
| 10 | 69.0856  |           |           |           |           |           |           |           |           |           |           |          |          |          | P(-.98)   | 141.0699  | 123.0594  | 124.0429  | 115.0906  | 97.0800   | 98.0636   | 71.0350  | 58.0453  | 1 |    |

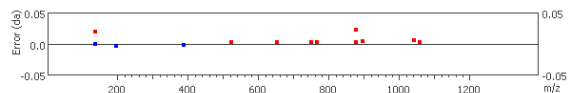

R.AEDQELESLSAIEAELEKVAHQQLALRR(-.98).G

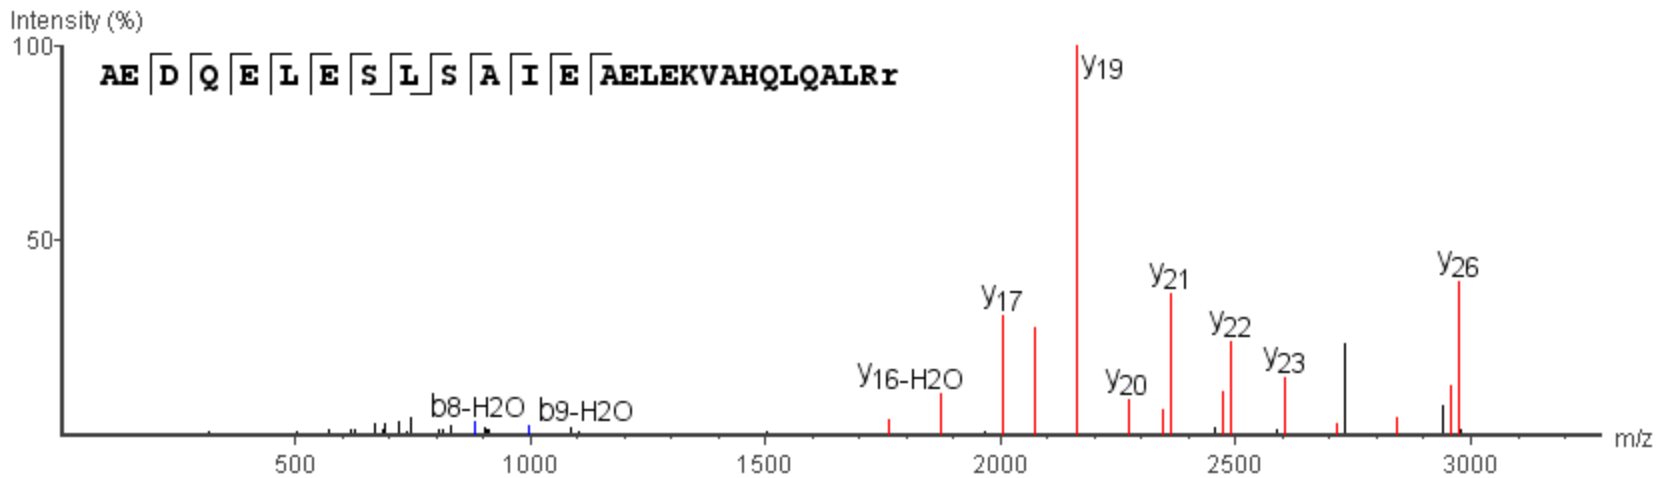

| #  | Inmonium | b         | b-H2O     | b-NH3     | a         | a-H2O     | a-NH3     | c         | c-H2O     | c-NH3     | c-H       | b(2+)     | a(2+)     | c(2+)     | Seq     | x         | x-H2O     | x-NH3     | y         | y-H2O     | y-NH3     | x(2+)     | y(2+)     | #  |
|----|----------|-----------|-----------|-----------|-----------|-----------|-----------|-----------|-----------|-----------|-----------|-----------|-----------|-----------|---------|-----------|-----------|-----------|-----------|-----------|-----------|-----------|-----------|----|
| 1  | 44.0499  | 72.0449   | 54.0344   | 55.0179   | 44.0499   | 26.0394   | 27.0229   | 89.0719   | 71.0614   | 72.0449   | 88.0641   | 36.5225   | 22.5250   | 45.0360   | A       |           |           |           |           |           |           |           |           | 28 |
| 2  | 102.0554 | 201.0875  | 183.0770  | 184.0605  | 173.0925  | 155.0820  | 156.0655  | 218.1145  | 200.1040  | 201.0875  | 217.1067  | 101.0438  | 87.0463   | 109.5573  | E       | 3130.6167 | 3112.6062 | 3113.5898 | 3104.6375 | 3086.6270 | 3087.6104 | 1565.8083 | 1552.8187 | 27 |
| 3  | 88.0398  | 316.1144  | 298.1039  | 299.0875  | 288.1194  | 270.1089  | 271.0925  | 333.1414  | 315.1309  | 316.1144  | 332.1336  | 158.5572  | 144.5597  | 167.0707  | D       | 3001.5740 | 2983.5635 | 2984.5471 | 2975.5864 | 2957.5842 | 2958.5762 | 1501.2870 | 1488.2974 | 26 |
| 4  | 101.0714 | 444.1730  | 426.1625  | 427.1461  | 416.1780  | 398.1675  | 399.1511  | 461.2000  | 443.1895  | 444.1730  | 460.1922  | 222.5865  | 208.5890  | 231.1000  | Q       | 2886.5471 | 2868.5366 | 2869.5203 | 2860.5679 | 2842.5420 | 2843.5452 | 1443.7736 | 1430.7839 | 25 |
| 5  | 102.0554 | 573.2156  | 555.2051  | 556.1887  | 545.2206  | 527.2101  | 528.1937  | 590.2427  | 572.2321  | 573.2156  | 589.2348  | 287.1078  | 273.1103  | 295.6213  | E       | 2758.4885 | 2740.4780 | 2741.4617 | 2732.5010 | 2714.4980 | 2715.4822 | 1379.7443 | 1366.7546 | 24 |
| 6  | 86.0969  | 686.2997  | 668.2891  | 669.2727  | 658.3047  | 640.2941  | 641.2777  | 703.3267  | 685.3162  | 686.2997  | 702.3188  | 343.6498  | 329.6523  | 352.1634  | L       | 2629.4460 | 2611.4355 | 2612.4192 | 2603.4600 | 2585.4507 | 2586.4397 | 1315.2230 | 1302.2334 | 23 |
| 7  | 102.0554 | 815.3423  | 797.3317  | 798.3153  | 787.3473  | 769.3367  | 770.3203  | 832.3693  | 814.3588  | 815.3423  | 831.3615  | 408.1711  | 394.1736  | 416.6847  | E       | 2516.3618 | 2498.3513 | 2499.3350 | 2490.3757 | 2472.3638 | 2473.3657 | 1258.6809 | 1245.6913 | 22 |
| 8  | 60.0449  | 902.3743  | 884.3643  | 885.3473  | 874.3793  | 856.3687  | 857.3523  | 919.4013  | 901.3907  | 902.3743  | 918.3934  | 451.6871  | 437.6896  | 460.2007  | S       | 2387.3193 | 2369.3088 | 2370.2925 | 2361.3325 | 2343.3230 | 2344.3100 | 1194.1597 | 1181.1700 | 21 |
| 9  | 86.0969  | 1015.4584 | 997.4478  | 998.4314  | 987.4634  | 969.4528  | 970.4364  | 1032.4854 | 1014.4749 | 1015.4584 | 1031.4775 | 508.2292  | 494.2317  | 516.7427  | L       | 2300.2874 | 2282.2769 | 2283.2605 | 2274.3008 | 2256.2976 | 2257.2810 | 1150.6437 | 1137.6541 | 20 |
| 10 | 60.0449  | 1102.4904 | 1084.4799 | 1085.4634 | 1074.4954 | 1056.4849 | 1057.4684 | 1119.5173 | 1101.5068 | 1102.4904 | 1118.5095 | 551.7452  | 537.7477  | 560.2587  | S       | 2187.2031 | 2169.1926 | 2170.1763 | 2161.2178 | 2143.2134 | 2144.1968 | 1094.1016 | 1081.1119 | 19 |
| 11 | 44.0499  | 1173.5275 | 1155.5170 | 1156.5005 | 1145.5325 | 1127.5220 | 1128.5055 | 1190.5544 | 1172.5439 | 1173.5275 | 1189.5466 | 587.2637  | 573.2662  | 595.7772  | A       | 2100.1711 | 2082.1606 | 2083.1443 | 2074.1855 | 2056.1814 | 2057.1648 | 1050.5856 | 1037.5959 | 18 |
| 12 | 86.0969  | 1286.6116 | 1268.6011 | 1269.5846 | 1258.6166 | 1240.6061 | 1241.5896 | 1303.6385 | 1285.6281 | 1286.6116 | 1302.6307 | 643.8058  | 629.8083  | 652.3193  | I       | 2029.1342 | 2011.1235 | 2012.1072 | 2003.1486 | 1985.1443 | 1986.1278 | 1015.0671 | 1002.0774 | 17 |
| 13 | 102.0554 | 1415.6542 | 1397.6437 | 1398.6272 | 1387.6592 | 1369.6487 | 1370.6322 | 1432.6812 | 1414.6707 | 1415.6542 | 1431.6733 | 708.3271  | 694.3296  | 716.8406  | E       | 1916.0502 | 1898.0396 | 1899.0232 | 1890.0708 | 1872.0542 | 1873.0438 | 958.5251  | 945.5354  | 16 |
| 14 | 44.0499  | 1486.6913 | 1468.6808 | 1469.6643 | 1458.6963 | 1440.6858 | 1441.6693 | 1503.7183 | 1485.7078 | 1486.6913 | 1502.7104 | 743.8456  | 729.8481  | 752.3591  | A       | 1787.0076 | 1769.9969 | 1769.9806 | 1761.0234 | 1743.0177 | 1744.0012 | 894.0038  | 881.0141  | 15 |
| 15 | 102.0554 | 1615.7339 | 1597.7234 | 1598.7069 | 1587.7389 | 1569.7284 | 1570.7119 | 1632.7609 | 1614.7504 | 1615.7339 | 1631.7531 | 808.3669  | 794.3694  | 816.8804  | E       | 1715.9705 | 1697.9598 | 1698.9435 | 1689.9911 | 1671.9806 | 1672.9641 | 858.4852  | 845.4955  | 14 |
| 16 | 86.0969  | 1728.8179 | 1710.8074 | 1711.7909 | 1700.8229 | 1682.8124 | 1683.7959 | 1745.8448 | 1727.8344 | 1728.8179 | 1744.8370 | 864.9089  | 850.9114  | 873.4224  | L       | 1586.9279 | 1568.9172 | 1569.9009 | 1560.9485 | 1542.9380 | 1543.9215 | 793.9639  | 780.9742  | 13 |
| 17 | 102.0554 | 1857.8605 | 1839.8500 | 1840.8335 | 1829.8655 | 1811.8550 | 1812.8385 | 1874.8875 | 1856.8770 | 1857.8605 | 1873.8796 | 929.4302  | 915.4327  | 937.9437  | E       | 1473.8438 | 1455.8331 | 1456.8168 | 1447.8644 | 1429.8539 | 1430.8374 | 737.4219  | 724.4322  | 12 |
| 18 | 101.1078 | 1985.9554 | 1967.9449 | 1968.9285 | 1957.9604 | 1939.9500 | 1940.9335 | 2002.9824 | 1984.9719 | 1985.9554 | 2001.9746 | 993.4777  | 979.4802  | 1001.9912 | K       | 1344.8011 | 1326.7905 | 1327.7742 | 1318.8218 | 1300.8113 | 1301.7948 | 672.9006  | 659.9109  | 11 |
| 19 | 72.0812  | 2085.0239 | 2067.0134 | 2067.9968 | 2057.0291 | 2039.0184 | 2040.0020 | 2102.0510 | 2084.0403 | 2085.0239 | 2101.0432 | 1043.0120 | 1029.0145 | 1051.5255 | V       | 1216.7062 | 1198.6956 | 1199.6792 | 1190.7268 | 1172.7176 | 1173.6998 | 608.8531  | 595.8634  | 10 |
| 20 | 44.0499  | 2156.0610 | 2138.0505 | 2139.0339 | 2128.0662 | 2110.0554 | 2111.0391 | 2173.0881 | 2155.0774 | 2156.0610 | 2172.0803 | 1078.5305 | 1064.5331 | 1087.0441 | A       | 1117.6378 | 1099.6272 | 1100.6108 | 1091.6584 | 1073.6479 | 1074.6315 | 559.3189  | 546.3292  | 9  |
| 21 | 110.0717 | 2293.1199 | 2275.1094 | 2276.0928 | 2265.1250 | 2247.1143 | 2248.0979 | 2310.1470 | 2292.1362 | 2293.1199 | 2309.1392 | 1147.0599 | 1133.0625 | 1155.5735 | H       | 1046.6007 | 1028.5901 | 1029.5737 | 1020.6213 | 1002.6108 | 1003.5944 | 523.8004  | 510.8107  | 8  |
| 22 | 101.0714 | 2421.1785 | 2403.1680 | 2404.1514 | 2393.1836 | 2375.1729 | 2376.1565 | 2438.2056 | 2420.1948 | 2421.1785 | 2437.1978 | 1211.0892 | 1197.0918 | 1219.6028 | Q       | 909.5418  | 891.5312  | 892.5148  | 883.5624  | 865.5519  | 866.5355  | 445.2709  | 442.2812  | 7  |
| 23 | 86.0969  | 2534.2625 | 2516.2520 | 2517.2354 | 2506.2676 | 2488.2568 | 2489.2405 | 2551.2896 | 2533.2788 | 2534.2625 | 2550.2817 | 1267.6312 | 1253.6338 | 1276.1448 | L       | 781.4832  | 763.4727  | 764.4562  | 755.5038  | 737.4933  | 738.4769  | 391.2416  | 378.2519  | 6  |
| 24 | 101.0714 | 2662.3210 | 2644.3105 | 2645.2939 | 2634.3262 | 2616.3154 | 2617.2991 | 2679.3481 | 2661.3374 | 2662.3210 | 2678.3403 | 1361.6605 | 1347.6631 | 1370.1741 | Q       | 668.3992  | 650.3886  | 651.3722  | 642.4198  | 624.4092  | 625.3928  | 334.6996  | 321.7099  | 5  |
| 25 | 44.0499  | 2763.3582 | 2745.3477 | 2746.3311 | 2735.3633 | 2687.3525 | 2688.3362 | 2750.3853 | 2732.3745 | 2733.3582 | 2749.3774 | 1367.1791 | 1353.1816 | 1375.6926 | A       | 540.3406  | 522.3300  | 523.3136  | 514.3612  | 496.3506  | 497.3342  | 270.6703  | 257.6806  | 4  |
| 26 | 86.0969  | 2846.4424 | 2828.4319 | 2829.4153 | 2818.4475 | 2800.4368 | 2801.4204 | 2863.4695 | 2845.4587 | 2846.4424 | 2862.4617 | 1423.7212 | 1409.7238 | 1432.2347 | L       | 469.3035  | 451.2929  | 452.2765  | 443.3241  | 425.3135  | 426.2971  | 235.1517  | 222.1620  | 3  |
| 27 | 129.1139 | 3002.5435 | 2984.5330 | 2985.5164 | 2974.5486 | 2956.5378 | 2957.5215 | 3019.5706 | 3001.5598 | 3002.5435 | 3018.5627 | 1501.7717 | 1487.7743 | 1510.2853 | R       | 356.2194  | 338.2089  | 339.1924  | 330.2401  | 312.2295  | 313.2131  | 178.6097  | 165.6200  | 2  |
| 28 | 128.1339 |           |           |           |           |           |           |           |           |           |           |           |           |           | R(-.98) | 200.1183  | 182.1077  | 183.0913  | 174.1389  | 156.1284  | 157.1119  | 100.5591  | 87.5695   | 1  |

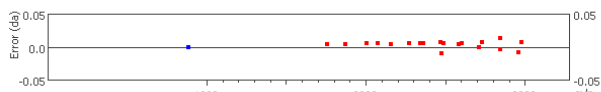

m/z=941.9301

Error=0.3ppm

AEEETAGGDGRPEPSPRE(-.98).G

Z=2

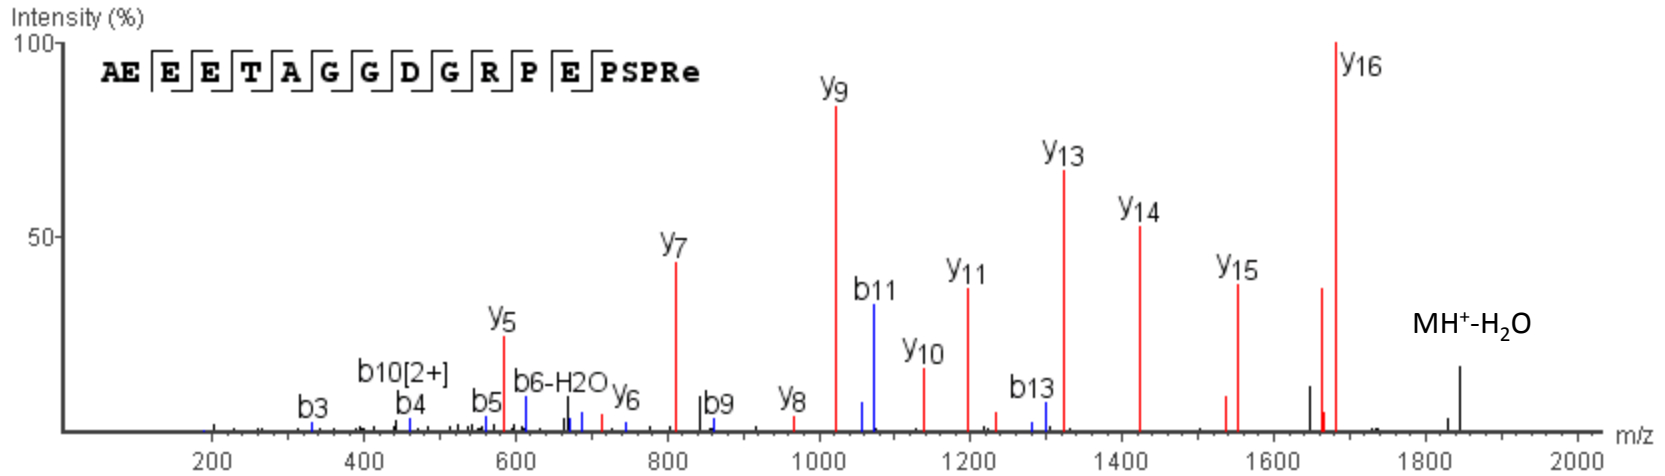

| #  | Immonium | b                | b-H2O           | b-NH3     | a         | a-H2O     | a-NH3     | c         | c-H2O     | c-NH3            | c-H       | b(2+)    | a(2+)    | c(2+)    | Seq     | x                | x-H2O     | x-NH3     | y                | y-H2O            | y-NH3            | x(2+)    | y(2+)    | #  |    |
|----|----------|------------------|-----------------|-----------|-----------|-----------|-----------|-----------|-----------|------------------|-----------|----------|----------|----------|---------|------------------|-----------|-----------|------------------|------------------|------------------|----------|----------|----|----|
| 1  | 44.0499  | 72.0449          | 54.0344         | 55.0179   | 44.0499   | 26.0394   | 27.0229   | 89.0719   | 71.0614   | 72.0449          | 88.0641   | 36.5225  | 22.5250  | 45.0360  | A       |                  |           |           |                  |                  |                  |          |          |    | 18 |
| 2  | 102.0554 | 201.0875         | 183.0770        | 184.0605  | 173.0925  | 155.0820  | 156.0655  | 218.1145  | 200.1040  | 201.0875         | 217.1067  | 101.0438 | 87.0463  | 109.5573 | E       | <b>1837.8295</b> | 1819.7881 | 1820.7717 | 1811.8193        | 1793.8088        | 1794.7924        | 919.3994 | 906.4097 | 17 |    |
| 3  | 102.0554 | 330.1301         | 312.1195        | 313.1031  | 302.1351  | 284.1245  | 285.1081  | 347.1571  | 329.1465  | 330.1301         | 346.1493  | 165.5650 | 151.5676 | 174.0786 | E       | 1708.7562        | 1690.7456 | 1691.7292 | <b>1682.7711</b> | <b>1664.7621</b> | 1665.7499        | 854.8781 | 841.8884 | 16 |    |
| 4  | 102.0554 | 459.1727         | 441.1621        | 442.1457  | 431.1777  | 413.1671  | 414.1507  | 476.1997  | 458.1891  | 459.1727         | 475.1919  | 230.0863 | 216.0888 | 238.5998 | E       | 1579.7136        | 1561.7030 | 1562.6866 | <b>1553.7296</b> | 1535.7238        | 1536.7073        | 790.3568 | 777.3671 | 15 |    |
| 5  | 74.0605  | 560.2203         | 542.2098        | 543.1934  | 532.2253  | 514.2148  | 515.1984  | 577.2474  | 559.2368  | 560.2203         | 576.2395  | 280.6102 | 266.6127 | 289.1237 | T       | 1450.6710        | 1432.6604 | 1433.6440 | <b>1424.6871</b> | 1406.6812        | 1407.6647        | 725.8355 | 712.8458 | 14 |    |
| 6  | 44.0499  | 631.2574         | 613.2469        | 614.2305  | 603.2625  | 585.2519  | 586.2355  | 648.2845  | 630.2739  | 631.2574         | 647.2766  | 316.1287 | 302.1312 | 324.6422 | A       | 1349.6233        | 1331.6127 | 1332.5963 | 1323.6439        | 1305.6334        | 1306.6169        | 675.3116 | 662.3220 | 13 |    |
| 7  | 30.0343  | 688.2789         | 670.2684        | 671.2520  | 660.2839  | 642.2734  | 643.2570  | 705.3060  | 687.2954  | 688.2789         | 704.2981  | 344.6395 | 330.6420 | 353.1530 | G       | 1278.5862        | 1260.5756 | 1261.5592 | 1252.6068        | 1234.5963        | 1235.5798        | 639.7931 | 626.8034 | 12 |    |
| 8  | 30.0343  | 745.3004         | 727.2899        | 728.2734  | 717.3054  | 699.2949  | 700.2784  | 762.3275  | 744.3169  | 745.3004         | 761.3196  | 373.1502 | 359.1527 | 381.6637 | G       | 1221.5647        | 1203.5541 | 1204.5377 | 1195.5853        | 1177.5748        | 1178.5583        | 611.2823 | 598.2927 | 11 |    |
| 9  | 88.0398  | <b>860.3263</b>  | <b>842.3153</b> | 843.3004  | 832.3323  | 814.3218  | 815.3054  | 877.3544  | 859.3438  | <b>860.3263</b>  | 876.3465  | 430.6637 | 416.6662 | 439.1772 | D       | 1164.5433        | 1146.5327 | 1147.5164 | 1138.5640        | 1120.5535        | 1121.5370        | 582.7717 | 569.7820 | 10 |    |
| 10 | 30.0343  | 917.3488         | 899.3383        | 900.3218  | 889.3538  | 871.3433  | 872.3268  | 934.3759  | 916.3653  | 917.3488         | 933.3680  | 459.1744 | 445.1769 | 467.6879 | G       | 1049.5164        | 1031.5057 | 1032.4894 | <b>1023.5328</b> | <b>1005.5211</b> | <b>1006.5012</b> | 525.2582 | 512.2685 | 9  |    |
| 11 | 129.1139 | <b>1073.4492</b> | 1055.4395       | 1056.4230 | 1045.4550 | 1027.4445 | 1028.4280 | 1090.4769 | 1072.4664 | <b>1073.4492</b> | 1089.4691 | 537.2250 | 523.2275 | 545.7385 | R       | 992.4949         | 974.4843  | 975.4679  | 966.5155         | 948.5049         | 949.4885         | 496.7474 | 483.7578 | 8  |    |
| 12 | 70.0656  | 1170.5027        | 1152.4922       | 1153.4757 | 1142.5077 | 1124.4972 | 1125.4807 | 1187.5297 | 1169.5192 | 1170.5027        | 1186.5219 | 585.7513 | 571.7538 | 594.2648 | P       | 836.3938         | 818.3832  | 819.3668  | <b>810.4104</b>  | 792.4039         | 793.3875         | 418.6969 | 405.7072 | 7  |    |
| 13 | 102.0554 | <b>1299.5458</b> | 1281.5348       | 1282.5183 | 1271.5503 | 1253.5398 | 1254.5233 | 1316.5723 | 1298.5618 | <b>1299.5458</b> | 1315.5645 | 650.2726 | 636.2751 | 658.7861 | E       | 739.3410         | 721.3304  | 722.3140  | 713.3616         | 695.3511         | 696.3347         | 370.1705 | 357.1808 | 6  |    |
| 14 | 70.0656  | 1396.5980        | 1378.5875       | 1379.5710 | 1368.6030 | 1350.5925 | 1351.5760 | 1413.6250 | 1395.6145 | 1396.5980        | 1412.6172 | 698.7990 | 684.8015 | 707.3125 | P       | 610.2985         | 592.2879  | 593.2715  | <b>584.3151</b>  | 566.3085         | 567.2921         | 305.6492 | 292.6595 | 5  |    |
| 15 | 60.0449  | 1483.6300        | 1465.6195       | 1466.6030 | 1455.6350 | 1437.6245 | 1438.6080 | 1500.6570 | 1482.6465 | 1483.6300        | 1499.6492 | 742.3150 | 728.3175 | 750.8285 | S       | 513.2457         | 495.2351  | 496.2187  | 487.2663         | 469.2557         | 470.2393         | 257.1228 | 244.1331 | 4  |    |
| 16 | 70.0656  | 1580.6827        | 1562.6722       | 1563.6558 | 1552.6877 | 1534.6772 | 1535.6608 | 1597.7097 | 1579.6992 | 1580.6827        | 1596.7019 | 790.8414 | 776.8439 | 799.3549 | P       | 426.2137         | 408.2031  | 409.1866  | 400.2343         | 382.2237         | 383.2073         | 213.6068 | 200.6171 | 3  |    |
| 17 | 129.1139 | <b>1736.7839</b> | 1718.7734       | 1719.7570 | 1708.7889 | 1690.7784 | 1691.7620 | 1753.8109 | 1735.8004 | <b>1736.7839</b> | 1752.8031 | 868.8920 | 854.8945 | 877.4055 | R       | 329.1609         | 311.1503  | 312.1339  | 303.1815         | 285.1710         | 286.1545         | 165.0804 | 152.0908 | 2  |    |
| 18 | 101.0754 |                  |                 |           |           |           |           |           |           |                  |           |          |          |          | E(-.98) | 173.0598         | 155.0492  | 156.0328  | 147.0804         | 129.0699         | 130.0534         | 87.0299  | 74.0402  | 1  |    |

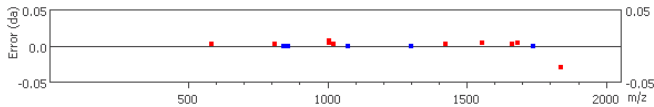

V.LRPDSEPRARL(-.98).G

m/z=436.9219

Error=1.3ppm

Z=3

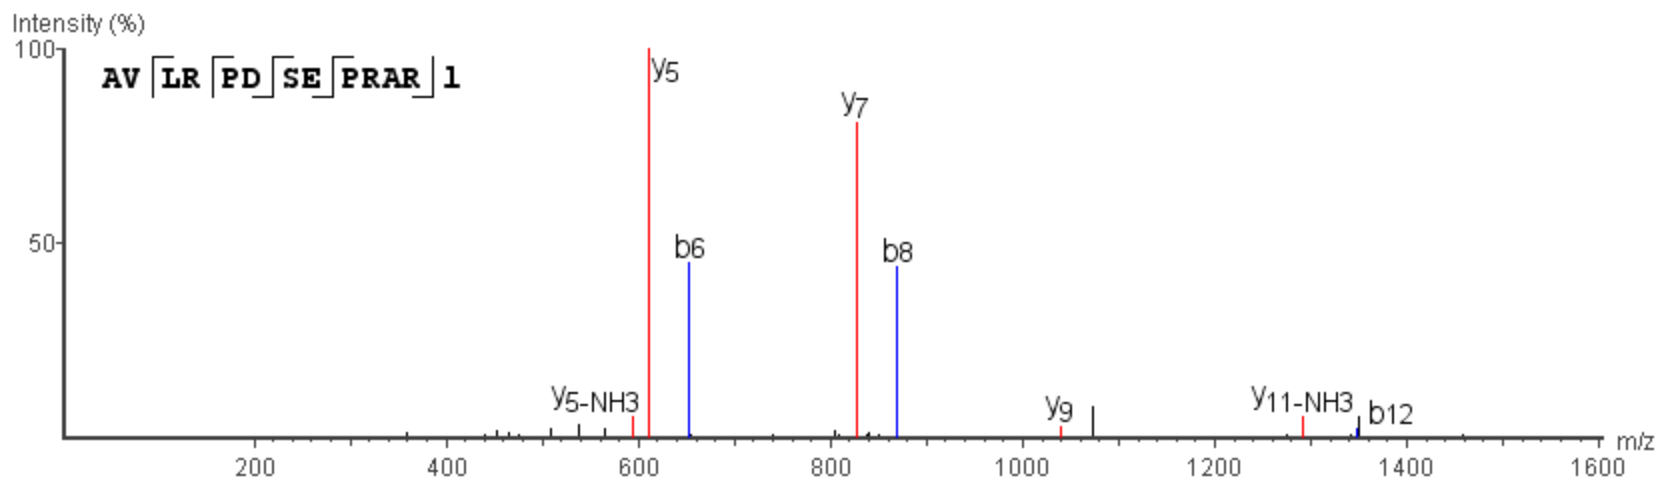

| #  | Immonium | b         | b-H2O     | b-NH3     | a         | a-H2O     | a-NH3     | c         | c-H2O     | c-NH3     | c-H       | b (2+)   | a (2+)   | c (2+)   | Seq     | x         | x-H2O     | x-NH3     | y         | y-H2O     | y-NH3     | x (2+)   | y (2+)   | #  |    |
|----|----------|-----------|-----------|-----------|-----------|-----------|-----------|-----------|-----------|-----------|-----------|----------|----------|----------|---------|-----------|-----------|-----------|-----------|-----------|-----------|----------|----------|----|----|
| 1  | 86.0969  | 114.0919  | 96.0813   | 97.0649   | 86.0969   | 68.0863   | 69.0699   | 131.1189  | 113.1083  | 114.0919  | 130.1111  | 57.5459  | 43.5484  | 66.0594  | L       |           |           |           |           |           |           |          |          |    | 11 |
| 2  | 129.1139 | 270.1930  | 252.1824  | 253.1660  | 242.1980  | 224.1874  | 225.1710  | 287.2200  | 269.1599  | 270.1930  | 286.2122  | 135.5965 | 121.5990 | 144.1100 | R       | 1221.6488 | 1203.6382 | 1204.6218 | 1195.6694 | 1177.6589 | 1178.6425 | 611.3244 | 598.3347 | 10 |    |
| 3  | 70.0656  | 367.2457  | 349.2352  | 350.2188  | 339.2507  | 321.2402  | 322.1867  | 384.2727  | 366.2622  | 367.2457  | 383.2649  | 184.1229 | 170.1254 | 192.6364 | P       | 1065.5476 | 1047.5370 | 1048.5206 | 1039.5604 | 1021.5577 | 1022.5413 | 533.2738 | 520.2841 | 9  |    |
| 4  | 88.0398  | 482.2708  | 464.2621  | 465.2457  | 454.2777  | 436.2671  | 437.2507  | 499.2997  | 481.2891  | 482.2708  | 498.2919  | 241.6363 | 227.6388 | 250.1498 | D       | 968.4949  | 950.4843  | 951.4679  | 942.5155  | 924.5049  | 925.4885  | 484.7474 | 471.7578 | 8  |    |
| 5  | 60.0449  | 569.3047  | 551.2941  | 552.2777  | 541.3097  | 523.2991  | 524.2827  | 586.3317  | 568.3212  | 569.3047  | 585.3239  | 285.1523 | 271.1548 | 293.6659 | S       | 853.4680  | 835.4574  | 836.4409  | 827.4819  | 809.4780  | 810.4616  | 427.2340 | 414.2443 | 7  |    |
| 6  | 102.0554 | 698.3447  | 680.3367  | 681.3203  | 670.3523  | 652.3417  | 653.3253  | 715.3743  | 697.3638  | 698.3447  | 714.3665  | 349.6736 | 335.6761 | 358.1872 | E       | 766.4359  | 748.4254  | 749.4089  | 740.4565  | 722.4460  | 723.4296  | 383.7180 | 370.7283 | 6  |    |
| 7  | 70.0656  | 795.4000  | 777.3895  | 778.3730  | 767.4050  | 749.3945  | 750.3781  | 812.4271  | 794.4165  | 795.4000  | 811.4192  | 398.2000 | 384.2025 | 406.7135 | P       | 637.3933  | 619.3828  | 620.3663  | 611.4080  | 593.4034  | 594.3870  | 319.1967 | 306.2070 | 5  |    |
| 8  | 129.1139 | 951.5012  | 933.4906  | 934.4742  | 923.5062  | 905.4956  | 906.4792  | 968.5282  | 950.5176  | 951.5012  | 967.5203  | 476.2506 | 462.2531 | 484.7641 | R       | 540.3406  | 522.3300  | 523.3136  | 514.3612  | 496.3506  | 497.3342  | 270.6703 | 257.6806 | 4  |    |
| 9  | 44.0499  | 1022.5383 | 1004.5277 | 1005.5113 | 994.5433  | 976.5327  | 977.5163  | 1039.5604 | 1021.5547 | 1022.5383 | 1038.5575 | 511.7692 | 497.7716 | 520.2827 | A       | 384.2395  | 366.2289  | 367.2125  | 358.2601  | 340.2495  | 341.2331  | 192.6197 | 179.6301 | 3  |    |
| 10 | 129.1139 | 1178.6394 | 1160.6289 | 1161.6124 | 1150.6444 | 1132.6339 | 1133.6174 | 1195.6664 | 1177.6559 | 1178.6394 | 1194.6586 | 589.8197 | 575.8222 | 598.3332 | R       | 313.2024  | 295.1918  | 296.1754  | 287.2230  | 269.2124  | 270.1960  | 157.1012 | 144.1115 | 2  |    |
| 11 | 85.1169  |           |           |           |           |           |           |           |           |           |           |          |          |          | L(-.98) | 157.1012  | 139.0907  | 140.0742  | 131.1219  | 113.1113  | 114.0949  | 79.0506  | 66.0609  | 1  |    |

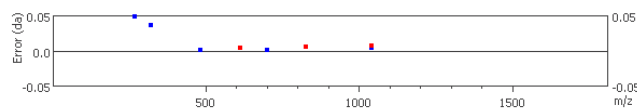

m/z=493.6242

Error=2.2ppm

R.AVLRPDSEPRARL(-.98).G

Z=3

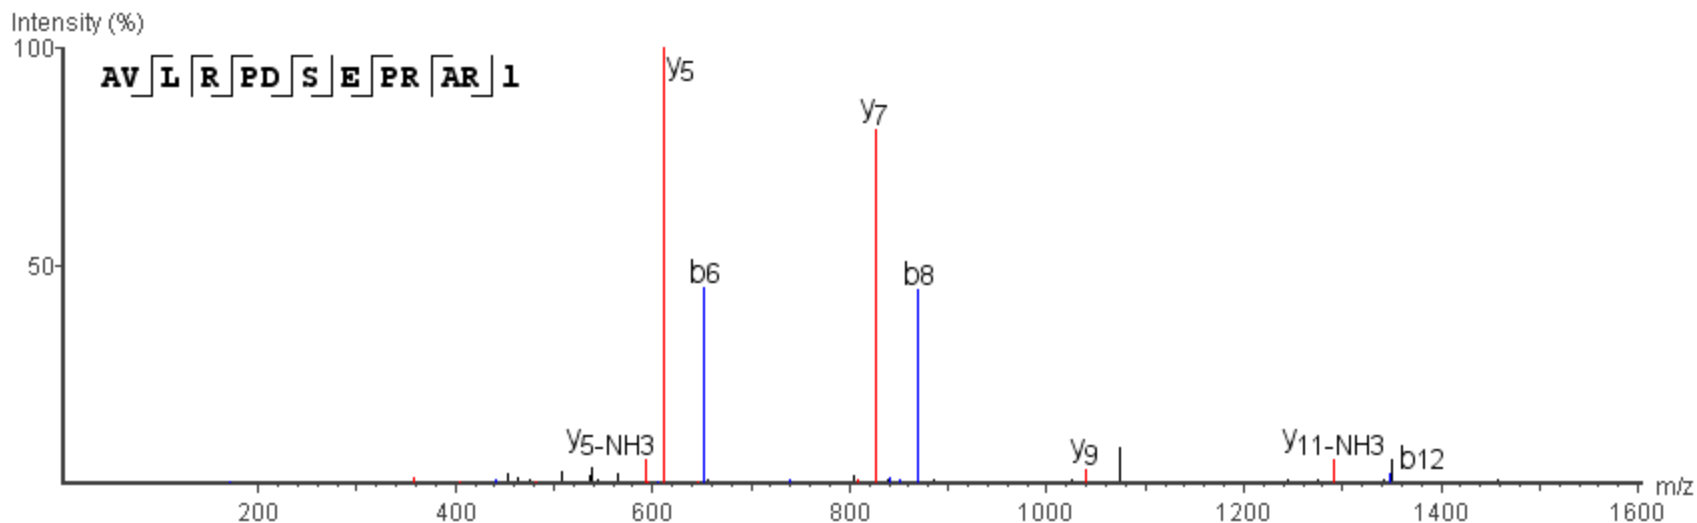

| #  | Immonium | b         | b-H2O     | b-NH3     | a         | a-H2O     | a-NH3     | c         | c-H2O     | c-NH3     | c-H       | b (2+)   | a (2+)   | c (2+)   | Seq     | x         | x-H2O     | x-NH3     | y         | y-H2O     | y-NH3     | x (2+)   | y (2+)   | #  |    |
|----|----------|-----------|-----------|-----------|-----------|-----------|-----------|-----------|-----------|-----------|-----------|----------|----------|----------|---------|-----------|-----------|-----------|-----------|-----------|-----------|----------|----------|----|----|
| 1  | 44.0499  | 72.0449   | 54.0344   | 55.0179   | 44.0499   | 26.0394   | 27.0229   | 89.0719   | 71.0614   | 72.0449   | 88.0641   | 36.5225  | 22.5250  | 45.0360  | A       |           |           |           |           |           |           |          |          |    | 13 |
| 2  | 72.0812  | 171.1134  | 153.1028  | 154.0863  | 143.1183  | 125.1078  | 126.0914  | 188.1404  | 170.1298  | 171.1134  | 187.1325  | 86.0567  | 72.0592  | 94.5702  | V       | 1433.8013 | 1415.7906 | 1416.7743 | 1407.8219 | 1389.8114 | 1390.7949 | 717.4006 | 704.4109 | 12 |    |
| 3  | 86.0969  | 284.1974  | 266.1868  | 267.1704  | 256.2024  | 238.1918  | 239.1754  | 301.2244  | 283.2138  | 284.1974  | 300.2166  | 142.5987 | 128.6012 | 151.1122 | L       | 1334.7328 | 1316.7222 | 1317.7058 | 1308.7534 | 1290.7429 | 1291.7219 | 667.8664 | 654.8767 | 11 |    |
| 4  | 129.1139 | 440.2985  | 422.2879  | 423.2715  | 412.3035  | 394.2929  | 395.2765  | 457.3255  | 439.3149  | 440.2985  | 456.3177  | 220.6492 | 206.6517 | 229.1628 | R       | 1221.6488 | 1203.6382 | 1204.6218 | 1195.6694 | 1177.6589 | 1178.6425 | 611.3244 | 598.3347 | 10 |    |
| 5  | 70.0656  | 537.3513  | 519.3407  | 520.3243  | 509.3563  | 491.3457  | 492.3293  | 554.3783  | 536.3677  | 537.3513  | 553.3704  | 269.1756 | 255.1781 | 277.6891 | P       | 1065.5476 | 1047.5370 | 1048.5206 | 1039.5638 | 1021.5577 | 1022.5413 | 533.2738 | 520.2841 | 9  |    |
| 6  | 88.0398  | 652.3774  | 634.3676  | 635.3512  | 624.3832  | 606.3726  | 607.3562  | 669.4052  | 651.3947  | 652.3774  | 668.3973  | 326.6891 | 312.6916 | 335.2026 | D       | 968.4949  | 950.4843  | 951.4679  | 942.5155  | 924.5049  | 925.4885  | 484.7474 | 471.7578 | 8  |    |
| 7  | 60.0449  | 739.4102  | 721.3997  | 722.3832  | 711.4152  | 693.4047  | 694.3882  | 756.4373  | 738.4267  | 739.4102  | 755.4294  | 370.2051 | 356.2076 | 378.7186 | S       | 853.4680  | 835.4574  | 836.4409  | 827.4846  | 809.4780  | 810.4616  | 427.2340 | 414.2443 | 7  |    |
| 8  | 102.0554 | 868.4521  | 850.4423  | 851.4258  | 840.4578  | 822.4473  | 823.4308  | 885.4799  | 867.4693  | 868.4521  | 884.4720  | 434.7264 | 420.7289 | 443.2399 | E       | 766.4359  | 748.4254  | 749.4089  | 740.4565  | 722.4460  | 723.4296  | 383.7180 | 370.7283 | 6  |    |
| 9  | 70.0656  | 965.5056  | 947.4950  | 948.4786  | 937.5106  | 919.5000  | 920.4836  | 982.5326  | 964.5220  | 965.5056  | 981.5247  | 483.2528 | 469.2553 | 491.7663 | P       | 637.3933  | 619.3828  | 620.3663  | 611.4108  | 593.4034  | 594.3840  | 319.1967 | 306.2070 | 5  |    |
| 10 | 129.1139 | 1121.6067 | 1103.5962 | 1104.5797 | 1093.6117 | 1075.6012 | 1076.5847 | 1138.6337 | 1120.6232 | 1121.6067 | 1137.6259 | 561.3033 | 547.3058 | 569.8168 | R       | 540.3406  | 522.3300  | 523.3136  | 514.3612  | 496.3506  | 497.3342  | 270.6703 | 257.6806 | 4  |    |
| 11 | 44.0499  | 1192.6438 | 1174.6333 | 1175.6168 | 1164.6488 | 1146.6383 | 1147.6218 | 1209.6708 | 1191.6603 | 1192.6438 | 1208.6630 | 596.8219 | 582.8244 | 605.3354 | A       | 384.2395  | 366.2289  | 367.2125  | 358.2601  | 340.2495  | 341.2331  | 192.6197 | 179.6301 | 3  |    |
| 12 | 129.1139 | 1348.7441 | 1330.7344 | 1331.7179 | 1320.7499 | 1302.7394 | 1303.7229 | 1365.7719 | 1347.7614 | 1348.7441 | 1364.7640 | 674.8724 | 660.8749 | 683.3859 | R       | 313.2024  | 295.1918  | 296.1754  | 287.2230  | 269.2124  | 270.1960  | 157.1012 | 144.1115 | 2  |    |
| 13 | 85.1169  |           |           |           |           |           |           |           |           |           |           |          |          |          | L(-.98) | 157.1012  | 139.0907  | 140.0742  | 131.1219  | 113.1113  | 114.0949  | 79.0506  | 66.0609  | 1  |    |

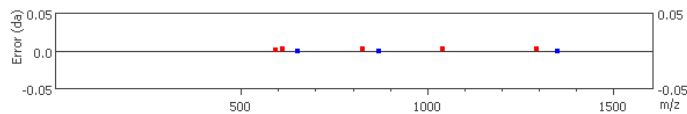



L.Q(-17.03)GLDPSHRISD.R

m/z=604.2899

Z=2

Error=2ppm

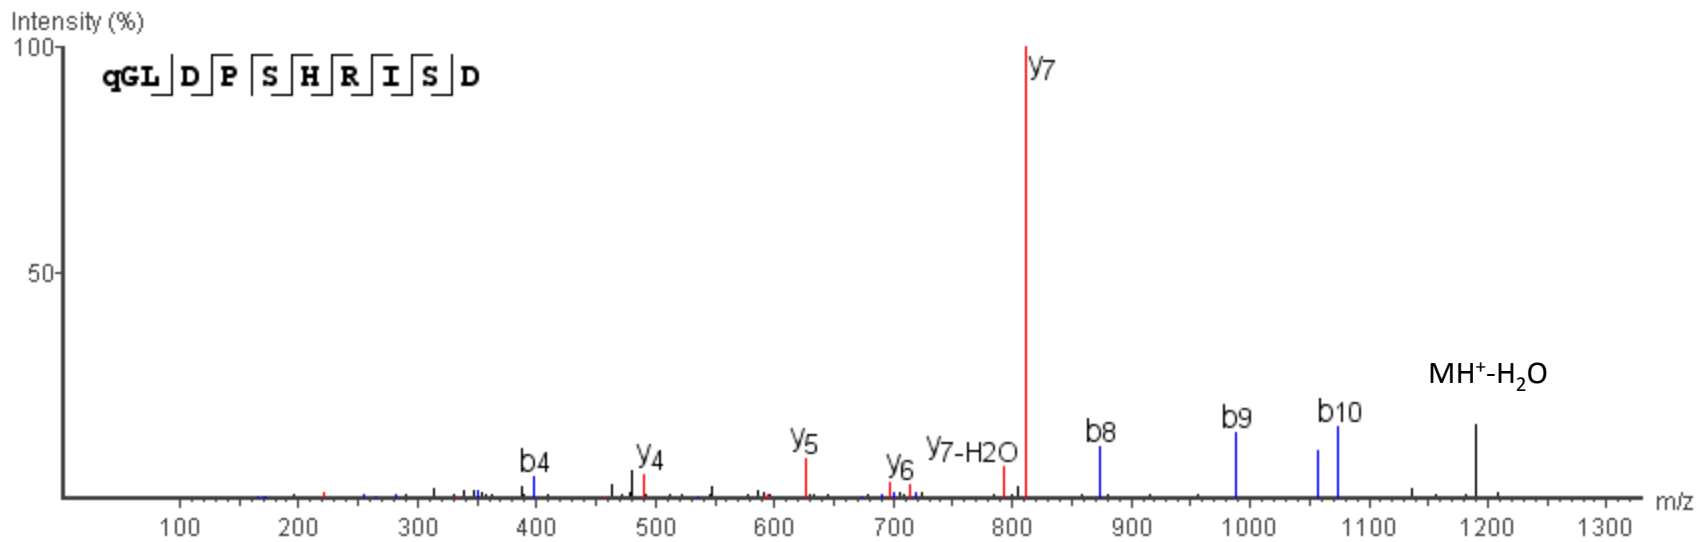

| #  | Immonium | b                         | b-H2O                     | b-NH3     | a         | a-H2O     | a-NH3     | c         | c-H2O     | c-NH3                     | c-H       | b (2+)   | a (2+)   | c (2+)   | Seq       | x         | x-H2O     | x-NH3     | y                        | y-H2O                    | y-NH3     | x (2+)   | y (2+)   | #  |    |
|----|----------|---------------------------|---------------------------|-----------|-----------|-----------|-----------|-----------|-----------|---------------------------|-----------|----------|----------|----------|-----------|-----------|-----------|-----------|--------------------------|--------------------------|-----------|----------|----------|----|----|
| 1  | 84.0414  | 112.0364                  | 94.0258                   | 95.0094   | 84.0414   | 66.0308   | 67.0144   | 129.0634  | 111.0528  | 112.0364                  | 128.0556  | 56.5182  | 42.5207  | 65.0317  | Q(-17.03) |           |           |           |                          |                          |           |          |          |    | 11 |
| 2  | 30.0343  | 169.0579                  | 151.0473                  | 152.0309  | 141.0629  | 123.0523  | 124.0359  | 186.0849  | 168.0743  | 169.0579                  | 185.0771  | 85.0289  | 71.0314  | 93.5424  | G         | 1122.5175 | 1104.5068 | 1105.4905 | 1096.5381                | 1078.5276                | 1079.5111 | 561.7587 | 548.7690 | 10 |    |
| 3  | 86.0969  | 282.1419                  | 264.1313                  | 265.1149  | 254.1469  | 236.1364  | 237.1199  | 299.1689  | 281.1584  | 282.1419                  | 298.1611  | 141.5710 | 127.5735 | 150.0845 | L         | 1065.4960 | 1047.4855 | 1048.4690 | 1039.5167                | 1021.5061                | 1022.4897 | 533.2480 | 520.2584 | 9  |    |
| 4  | 88.0398  | <a href="#">397.1726</a>  | 379.1583                  | 380.1419  | 369.1739  | 351.1633  | 352.1469  | 414.1959  | 396.1853  | <a href="#">397.1726</a>  | 413.1880  | 199.0844 | 185.0869 | 207.5979 | D         | 952.4120  | 934.4014  | 935.3850  | 926.4326                 | 908.4221                 | 909.4056  | 476.7060 | 463.7163 | 8  |    |
| 5  | 70.0656  | 494.2216                  | 476.2111                  | 477.1946  | 466.2266  | 448.2161  | 449.1996  | 511.2487  | 493.2381  | 494.2216                  | 510.2408  | 247.6108 | 233.6133 | 256.1243 | P         | 837.3850  | 819.3745  | 820.3580  | <a href="#">811.4062</a> | <a href="#">793.3958</a> | 794.3787  | 419.1925 | 406.2028 | 7  |    |
| 6  | 60.0449  | 581.2537                  | 563.2431                  | 564.2267  | 553.2587  | 535.2481  | 536.2317  | 598.2807  | 580.2701  | 581.2537                  | 597.2728  | 291.1268 | 277.1293 | 299.6404 | S         | 740.3323  | 722.3217  | 723.3053  | <a href="#">714.3529</a> | <a href="#">696.3798</a> | 697.3259  | 370.6661 | 357.6765 | 6  |    |
| 7  | 110.0717 | 718.3126                  | 700.3020                  | 701.2856  | 690.3176  | 672.3070  | 673.2906  | 735.3396  | 717.3290  | 718.3126                  | 734.3317  | 359.6563 | 345.6588 | 368.1698 | H         | 653.3002  | 635.2897  | 636.2732  | <a href="#">627.3215</a> | 609.3103                 | 610.2939  | 327.1501 | 314.1604 | 5  |    |
| 8  | 129.1139 | <a href="#">874.4164</a>  | 856.4031                  | 857.3867  | 846.4186  | 828.4081  | 829.3917  | 891.4407  | 873.4301  | <a href="#">874.4164</a>  | 890.4328  | 437.7068 | 423.7093 | 446.2203 | R         | 516.2413  | 498.2308  | 499.2143  | <a href="#">490.2622</a> | 472.2514                 | 473.2350  | 258.6207 | 245.6310 | 4  |    |
| 9  | 86.0969  | <a href="#">987.5021</a>  | 969.4872                  | 970.4708  | 959.5027  | 941.4922  | 942.4758  | 1004.5248 | 986.5142  | <a href="#">987.5021</a>  | 1003.5169 | 494.2489 | 480.2514 | 502.7624 | I         | 360.1402  | 342.1297  | 343.1132  | 334.1609                 | 316.1503                 | 317.1339  | 180.5701 | 167.5804 | 3  |    |
| 10 | 60.0449  | <a href="#">1074.5327</a> | <a href="#">1056.5223</a> | 1057.5028 | 1046.5348 | 1028.5243 | 1029.5078 | 1091.5568 | 1073.5463 | <a href="#">1074.5327</a> | 1090.5490 | 537.7649 | 523.7674 | 546.2784 | S         | 247.0562  | 229.0456  | 230.0291  | 221.0768                 | 203.0662                 | 204.0498  | 124.0281 | 111.0384 | 2  |    |
| 11 | 88.0398  |                           |                           |           |           |           |           |           |           |                           |           |          |          |          | D         | 160.0241  | 142.0136  | 142.9971  | 134.0448                 | 116.0342                 | 117.0178  | 80.5121  | 67.5224  | 1  |    |

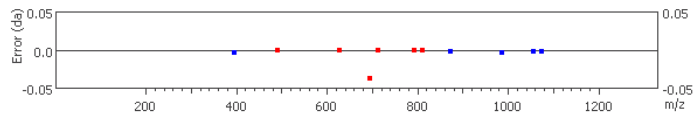

Y.MGWMDF(-.98).G

m/z=785.3115

Error=0.8ppm

Z=1

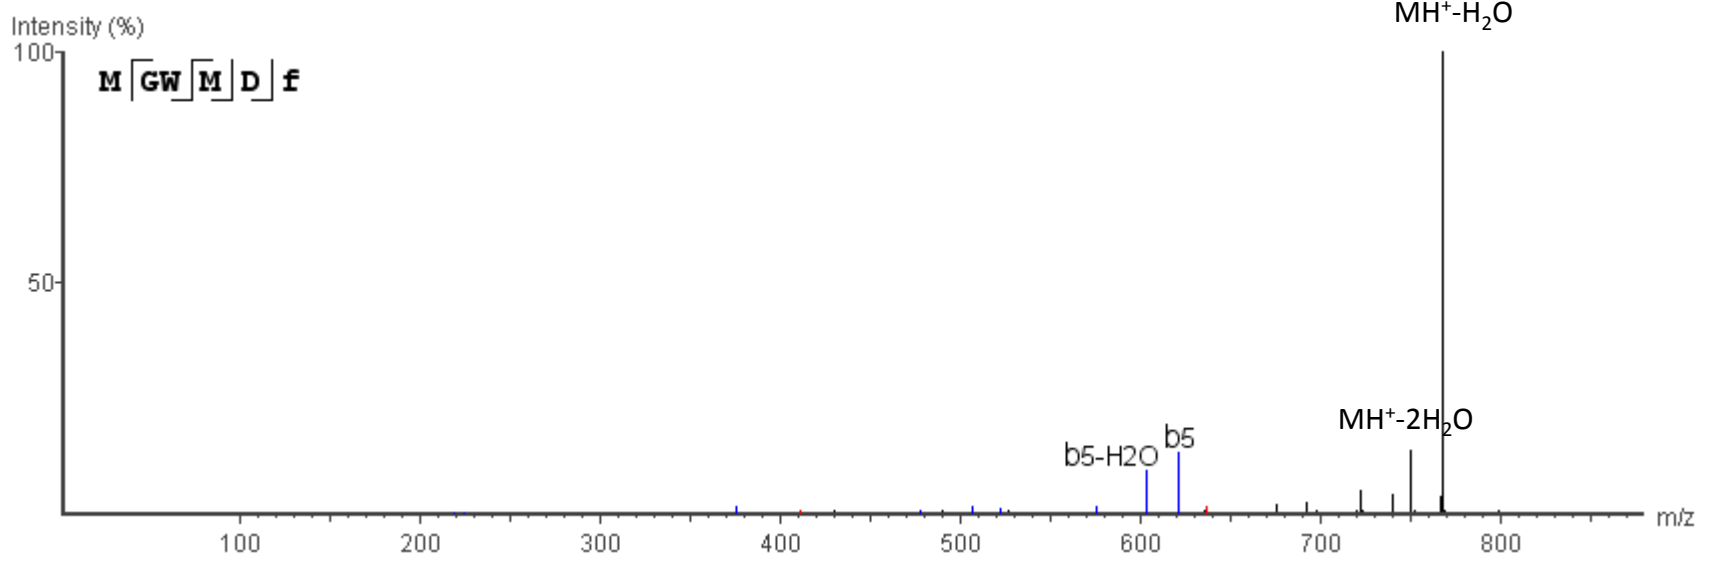

| # | Immonium | b        | b-H2O    | b-NH3    | a        | a-H2O    | a-NH3    | c        | c-H2O    | c-NH3    | c-H      | b (2+)   | a (2+)   | c (2+)   | Seq     | x        | x-H2O    | x-NH3    | y        | y-H2O    | y-NH3    | x (2+)   | y (2+)   | # |  |   |
|---|----------|----------|----------|----------|----------|----------|----------|----------|----------|----------|----------|----------|----------|----------|---------|----------|----------|----------|----------|----------|----------|----------|----------|---|--|---|
| 1 | 104.0533 | 132.0483 | 114.0378 | 115.0213 | 104.0533 | 86.0428  | 87.0263  | 149.0753 | 131.0648 | 132.0483 | 148.0675 | 66.5242  | 52.5267  | 75.0377  | M       |          |          |          |          |          |          |          |          |   |  | 6 |
| 2 | 30.0343  | 189.0698 | 171.0592 | 172.0428 | 161.0748 | 143.0642 | 144.0478 | 206.0968 | 188.0862 | 189.0698 | 205.0890 | 95.0349  | 81.0374  | 103.5484 | G       | 680.2538 | 662.2432 | 663.2268 | 654.2744 | 636.2639 | 637.2474 | 340.6269 | 327.6372 | 5 |  |   |
| 3 | 159.0921 | 375.1491 | 357.1385 | 358.1221 | 347.1541 | 329.1435 | 330.1271 | 392.1761 | 374.1655 | 375.1491 | 391.1683 | 188.0745 | 174.0770 | 196.5880 | W       | 623.2324 | 605.2218 | 606.2053 | 597.2530 | 579.2424 | 580.2260 | 312.1162 | 299.1265 | 4 |  |   |
| 4 | 104.0533 | 506.1896 | 488.1790 | 489.1626 | 478.1946 | 460.1840 | 461.1676 | 523.2166 | 505.2060 | 506.1896 | 522.2087 | 253.5948 | 239.5973 | 262.1083 | M       | 437.1530 | 419.1425 | 420.1260 | 411.1737 | 393.1631 | 394.1467 | 219.0765 | 206.0868 | 3 |  |   |
| 5 | 88.0398  | 621.2143 | 603.2036 | 604.1896 | 593.2216 | 575.2110 | 576.1946 | 638.2436 | 620.2330 | 621.2143 | 637.2357 | 311.1083 | 297.1108 | 319.6218 | D       | 306.1125 | 288.1020 | 289.0855 | 280.1332 | 262.1226 | 263.1062 | 153.5563 | 140.5666 | 2 |  |   |
| 6 | 119.1012 |          |          |          |          |          |          |          |          |          |          |          |          |          | F(-.98) | 191.0856 | 173.0750 | 174.0586 | 165.1062 | 147.0957 | 148.0792 | 96.0428  | 83.0531  | 1 |  |   |

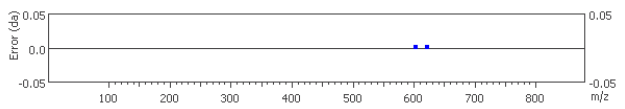

D.YMGWMDF(-.98).G

m/z=948.3752

Error=1ppm

Z=1

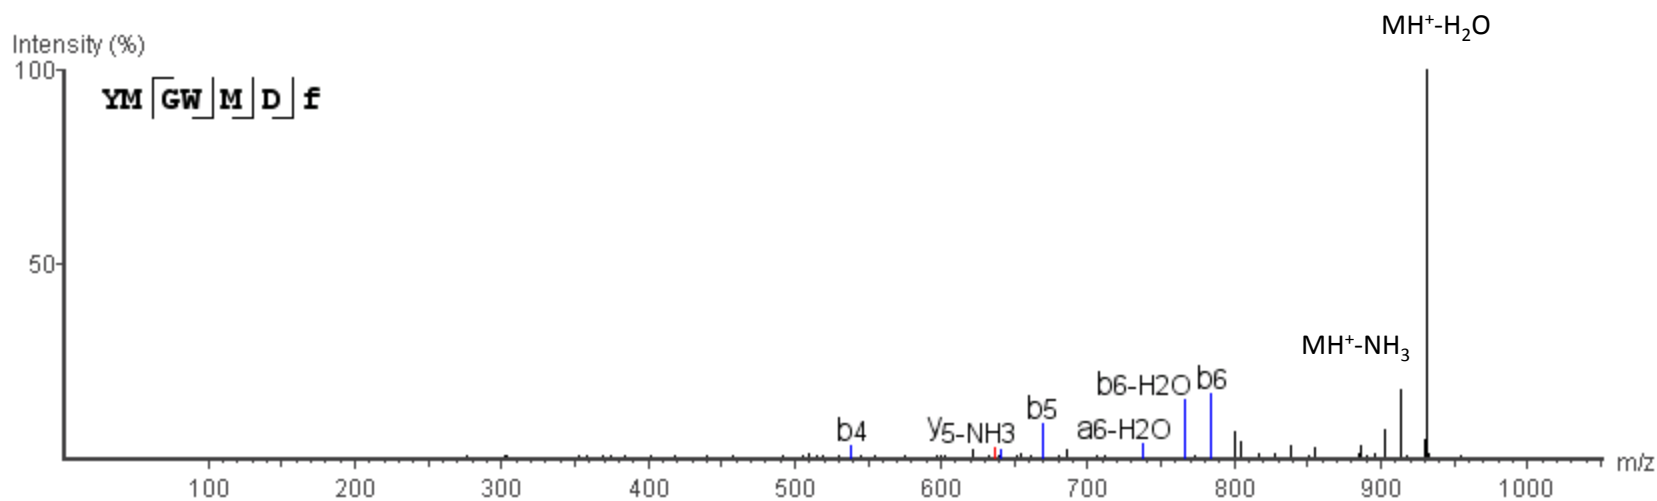

| # | Inmonium | b        | b-H2O    | b-NH3    | a        | a-H2O    | a-NH3    | c        | c-H2O    | c-NH3    | c-H      | b (2+)   | a (2+)   | c (2+)   | Seq     | x        | x-H2O    | x-NH3    | y        | y-H2O    | y-NH3    | x (2+)   | y (2+)   | # |   |
|---|----------|----------|----------|----------|----------|----------|----------|----------|----------|----------|----------|----------|----------|----------|---------|----------|----------|----------|----------|----------|----------|----------|----------|---|---|
| 1 | 136.0761 | 164.0712 | 146.0606 | 147.0441 | 136.0761 | 118.0656 | 119.0491 | 181.0981 | 163.0876 | 164.0712 | 180.0903 | 82.5356  | 68.5381  | 91.0491  | Y       |          |          |          |          |          |          |          |          |   | 7 |
| 2 | 104.0533 | 295.1116 | 277.1011 | 278.0847 | 267.1166 | 249.1061 | 250.0896 | 312.1386 | 294.1281 | 295.1116 | 311.1308 | 148.0558 | 134.0583 | 156.5693 | M       | 811.2943 | 793.2838 | 794.2673 | 785.3149 | 767.3044 | 768.2880 | 406.1472 | 393.1575 | 6 |   |
| 3 | 30.0343  | 352.1331 | 334.1225 | 335.1061 | 324.1381 | 306.1275 | 307.1111 | 369.1601 | 351.1495 | 352.1331 | 368.1523 | 176.5665 | 162.5690 | 185.0800 | G       | 680.2538 | 662.2432 | 663.2268 | 654.2744 | 636.2639 | 637.2421 | 340.6269 | 327.6372 | 5 |   |
| 4 | 159.0921 | 538.2112 | 520.2018 | 521.1854 | 510.2174 | 492.2068 | 493.1904 | 555.2394 | 537.2289 | 538.2112 | 554.2316 | 269.6062 | 255.6087 | 278.1197 | W       | 623.2324 | 605.2218 | 606.2053 | 597.2530 | 579.2424 | 580.2260 | 312.1162 | 299.1265 | 4 |   |
| 5 | 104.0533 | 669.2522 | 651.2424 | 652.2260 | 641.2578 | 623.2474 | 624.2310 | 686.2800 | 668.2694 | 669.2522 | 685.2812 | 335.1265 | 321.1290 | 343.6400 | M       | 437.1530 | 419.1425 | 420.1260 | 411.1737 | 393.1631 | 394.1467 | 219.0765 | 206.0868 | 3 |   |
| 6 | 88.0398  | 784.2788 | 766.2679 | 767.2529 | 756.2849 | 738.2732 | 739.2579 | 801.3069 | 783.2963 | 784.2788 | 800.3070 | 392.6399 | 378.6424 | 401.1534 | D       | 306.1125 | 288.1020 | 289.0855 | 280.1332 | 262.1226 | 263.1062 | 153.5563 | 140.5666 | 2 |   |
| 7 | 119.1012 |          |          |          |          |          |          |          |          |          |          |          |          |          | F(-.98) | 191.0856 | 173.0750 | 174.0586 | 165.1062 | 147.0957 | 148.0792 | 96.0428  | 83.0531  | 1 |   |

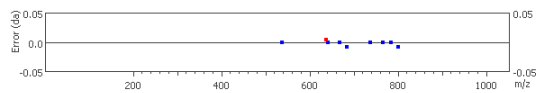

A.Q(-17.03)EDAELQP.R

m/z=912.3934

Z=1

Error=-1.2ppm

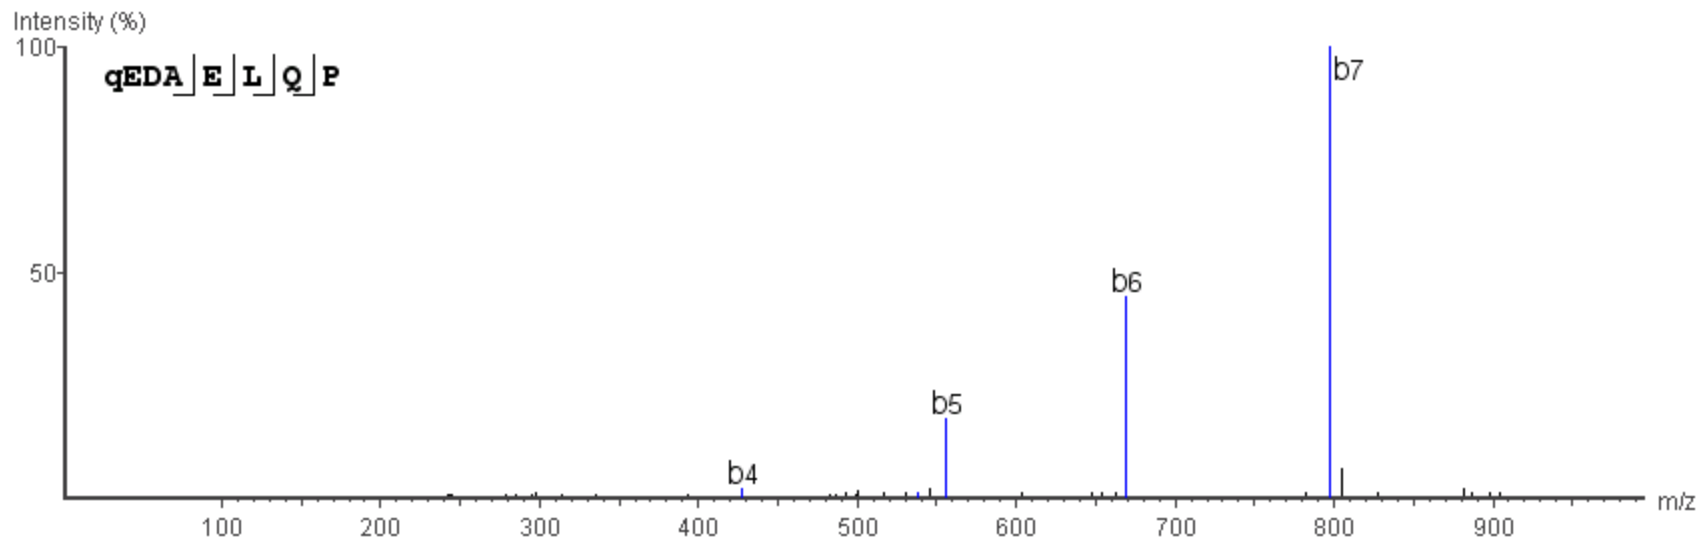

| # | Immonium | b        | b-H2O    | b-NH3    | a        | a-H2O    | a-NH3    | c        | c-H2O    | c-NH3    | c-H      | b (2+)   | a (2+)   | c (2+)   | Seq       | x        | x-H2O    | x-NH3    | y        | y-H2O    | y-NH3    | x (2+)   | y (2+)   | # |   |
|---|----------|----------|----------|----------|----------|----------|----------|----------|----------|----------|----------|----------|----------|----------|-----------|----------|----------|----------|----------|----------|----------|----------|----------|---|---|
| 1 | 84.0414  | 112.0364 | 94.0258  | 95.0094  | 84.0414  | 66.0308  | 67.0144  | 129.0634 | 111.0528 | 112.0364 | 128.0556 | 56.5182  | 42.5207  | 65.0317  | Q(-17.03) |          |          |          |          |          |          |          |          |   | 8 |
| 2 | 102.0554 | 241.0790 | 223.0684 | 224.0520 | 213.0840 | 195.0734 | 196.0570 | 258.1060 | 240.0954 | 241.0790 | 257.0982 | 121.0395 | 107.0420 | 129.5530 | E         | 827.3418 | 809.3312 | 810.3148 | 801.3624 | 783.3519 | 784.3354 | 414.1709 | 401.1812 | 7 |   |
| 3 | 88.0398  | 356.1059 | 338.0954 | 339.0789 | 328.1109 | 310.1004 | 311.0839 | 373.1329 | 355.1224 | 356.1059 | 372.1251 | 178.5530 | 164.5555 | 187.0665 | D         | 698.2992 | 680.2886 | 681.2722 | 672.3198 | 654.3093 | 655.2928 | 349.6496 | 336.6599 | 6 |   |
| 4 | 44.0499  | 427.1463 | 409.1325 | 410.1161 | 399.1480 | 381.1375 | 382.1210 | 444.1700 | 426.1595 | 427.1463 | 443.1622 | 214.0715 | 200.0740 | 222.5850 | A         | 583.2723 | 565.2617 | 566.2452 | 557.2929 | 539.2823 | 540.2659 | 292.1361 | 279.1465 | 5 |   |
| 5 | 102.0554 | 556.1881 | 538.1750 | 539.1586 | 528.1906 | 510.1801 | 511.1636 | 573.2126 | 555.2021 | 556.1881 | 572.2048 | 278.5928 | 264.5953 | 287.1063 | E         | 512.2352 | 494.2246 | 495.2082 | 486.2558 | 468.2452 | 469.2288 | 256.6176 | 243.6279 | 4 |   |
| 6 | 86.0969  | 669.2720 | 651.2591 | 652.2427 | 641.2747 | 623.2641 | 624.2477 | 686.2967 | 668.2861 | 669.2720 | 685.2888 | 335.1348 | 321.1373 | 343.6483 | L         | 383.1926 | 365.1820 | 366.1656 | 357.2132 | 339.2027 | 340.1862 | 192.0963 | 179.1066 | 3 |   |
| 7 | 101.0714 | 797.3307 | 779.3177 | 780.3013 | 769.3333 | 751.3227 | 752.3063 | 814.3553 | 796.3447 | 797.3307 | 813.3474 | 399.1641 | 385.1666 | 407.6776 | Q         | 270.1085 | 252.0980 | 253.0815 | 244.1292 | 226.1186 | 227.1022 | 135.5543 | 122.5646 | 2 |   |
| 8 | 70.0656  |          |          |          |          |          |          |          |          |          |          |          |          |          | P         | 142.0499 | 124.0394 | 125.0229 | 116.0706 | 98.0600  | 99.0436  | 71.5250  | 58.5353  | 1 |   |

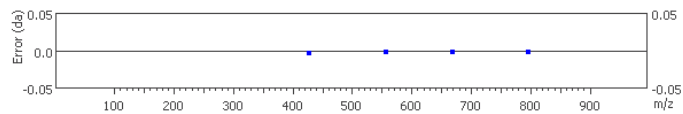

A.Q(-17.03)EDAELQPR.A

m/z=1068.4962

Error=0.6ppm

Z=1

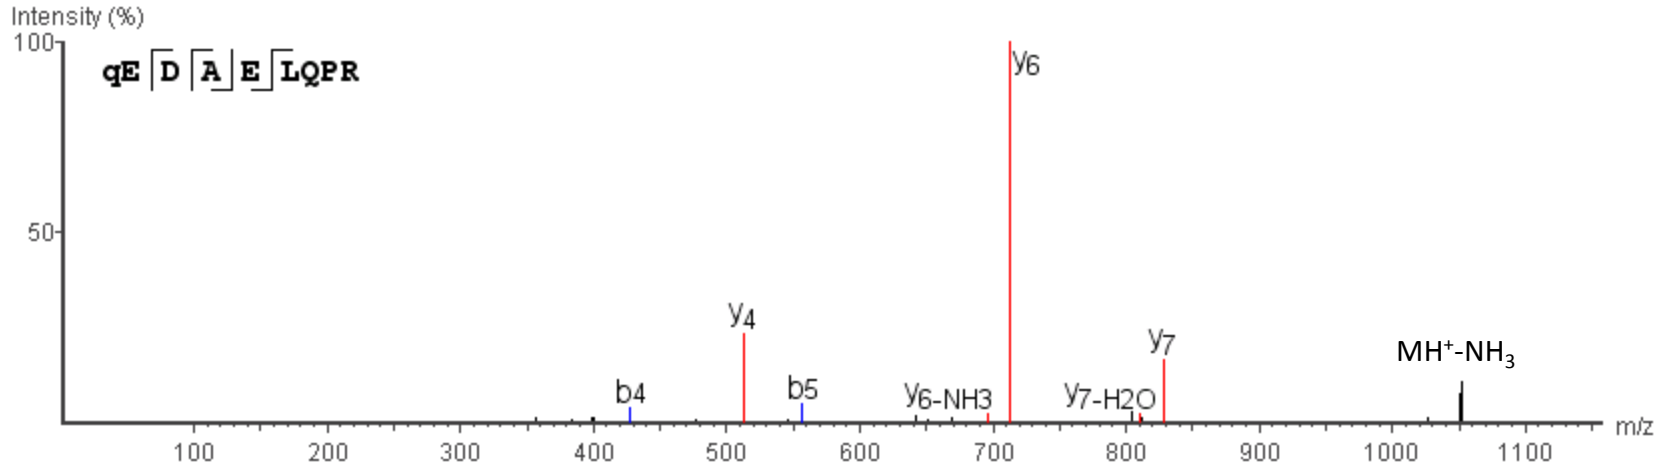

| # | Immonium | b      | b-H2O  | b-NH3  | a      | a-H2O  | a-NH3  | c      | c-H2O  | c-NH3  | b (2+) | a (2+) | c (2+) | Seq       | x      | x-H2O  | x-NH3  | y      | y-H2O  | y-NH3  | x (2+) | y (2+) | # |   |
|---|----------|--------|--------|--------|--------|--------|--------|--------|--------|--------|--------|--------|--------|-----------|--------|--------|--------|--------|--------|--------|--------|--------|---|---|
| 1 | 84.04    | 112.04 | 94.03  | 95.01  | 84.04  | 66.03  | 67.01  | 129.06 | 111.05 | 112.04 | 56.52  | 42.52  | 65.03  | Q(-17.03) |        |        |        |        |        |        |        |        |   | 9 |
| 2 | 102.06   | 241.08 | 223.07 | 224.05 | 213.08 | 195.07 | 196.06 | 258.11 | 240.10 | 241.08 | 121.04 | 107.04 | 129.55 | E         | 983.44 | 965.43 | 966.42 | 957.46 | 939.45 | 940.44 | 492.22 | 479.23 | 8 |   |
| 3 | 88.04    | 356.11 | 338.10 | 339.08 | 328.11 | 310.10 | 311.08 | 373.13 | 355.12 | 356.11 | 178.55 | 164.56 | 187.07 | D         | 854.40 | 836.39 | 837.37 | 828.42 | 810.41 | 811.39 | 427.70 | 414.71 | 7 |   |
| 4 | 44.05    | 427.15 | 409.13 | 410.12 | 399.15 | 381.14 | 382.12 | 444.17 | 426.16 | 427.15 | 214.07 | 200.07 | 222.59 | A         | 739.37 | 721.36 | 722.35 | 713.39 | 695.38 | 696.37 | 370.19 | 357.20 | 6 |   |
| 5 | 102.06   | 556.19 | 538.18 | 539.16 | 528.19 | 510.18 | 511.16 | 573.21 | 555.20 | 556.19 | 278.59 | 264.60 | 287.11 | E         | 668.34 | 650.33 | 651.31 | 642.36 | 624.35 | 625.33 | 334.67 | 321.68 | 5 |   |
| 6 | 86.10    | 669.27 | 651.26 | 652.24 | 641.27 | 623.26 | 624.25 | 686.30 | 668.29 | 669.27 | 335.13 | 321.14 | 343.65 | L         | 539.29 | 521.28 | 522.27 | 513.31 | 495.30 | 496.29 | 270.15 | 257.16 | 4 |   |
| 7 | 101.07   | 797.33 | 779.32 | 780.30 | 769.33 | 751.32 | 752.31 | 814.36 | 796.34 | 797.33 | 399.16 | 385.17 | 407.68 | Q         | 426.21 | 408.20 | 409.18 | 400.23 | 382.22 | 383.20 | 213.60 | 200.62 | 3 |   |
| 8 | 70.07    | 894.38 | 876.37 | 877.35 | 866.39 | 848.38 | 849.36 | 911.41 | 893.40 | 894.38 | 447.69 | 433.69 | 456.20 | P         | 298.15 | 280.14 | 281.12 | 272.17 | 254.16 | 255.14 | 149.58 | 136.59 | 2 |   |
| 9 | 129.11   |        |        |        |        |        |        |        |        |        |        |        |        | R         | 201.10 | 183.09 | 184.07 | 175.12 | 157.11 | 158.09 | 101.05 | 88.06  | 1 |   |

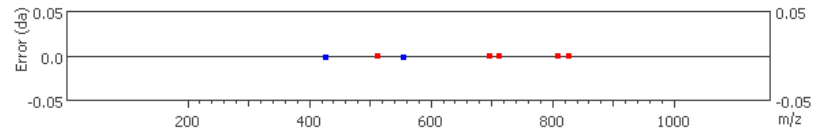

Q(-17.03)LRAPGAVLQIEALQEVLLKLLKS.K

m/z=629.6286

Error=-1.7ppm

Z=4

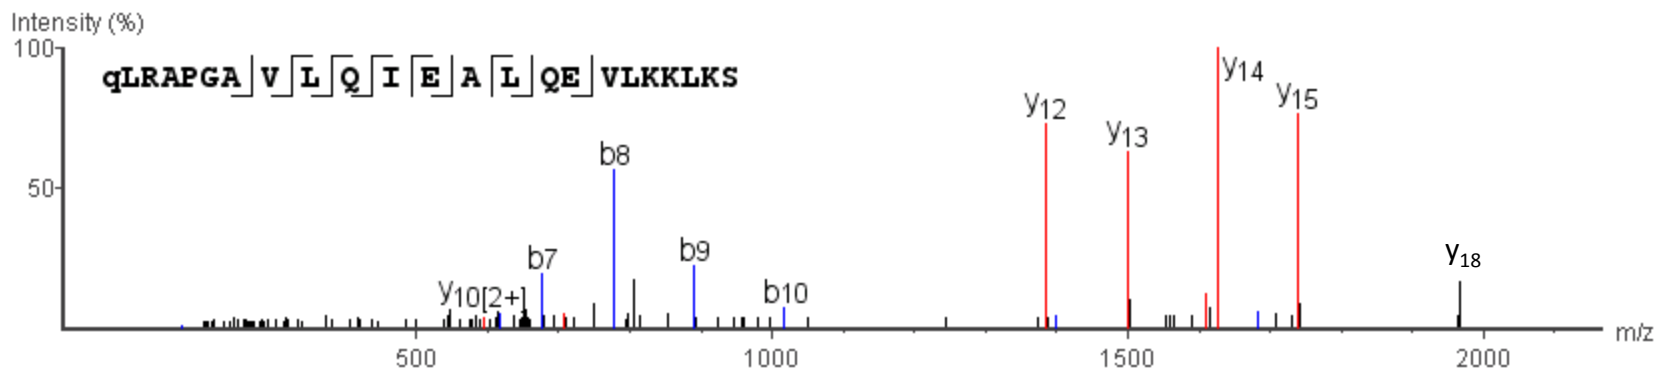

| #  | Immonium | b                | b-H2O     | b-NH3            | a         | a-H2O            | a-NH3     | c         | c-H2O     | c-NH3            | c-H       | b(2+)     | a(2+)           | c(2+)     | Seq       | x         | x-H2O     | x-NH3     | y                | y-H2O     | y-NH3            | x(2+)           | y(2+)           | #  |    |
|----|----------|------------------|-----------|------------------|-----------|------------------|-----------|-----------|-----------|------------------|-----------|-----------|-----------------|-----------|-----------|-----------|-----------|-----------|------------------|-----------|------------------|-----------------|-----------------|----|----|
| 1  | 84.0414  | 112.0364         | 94.0258   | 95.0094          | 84.0414   | 66.0308          | 67.0144   | 129.0634  | 111.0528  | 112.0364         | 128.0556  | 56.5182   | 42.5207         | 65.0317   | Q(-17.03) |           |           |           |                  |           |                  |                 |                 |    | 23 |
| 2  | 86.0969  | 225.1205         | 207.1099  | 208.0935         | 197.1255  | 179.1149         | 180.0985  | 242.1475  | 224.1369  | 225.1205         | 241.1396  | 113.0602  | 99.0627         | 121.5737  | L         | 2430.4441 | 2412.4336 | 2413.4172 | 2404.4648        | 2386.4543 | 2387.4377        | 1215.7220       | 1202.7324       | 22 |    |
| 3  | 129.1139 | 381.2216         | 363.2110  | 364.1946         | 353.2266  | 335.2160         | 336.1996  | 398.2486  | 380.2380  | 381.2216         | 397.2408  | 191.1108  | 177.1133        | 199.6243  | R         | 2317.3601 | 2299.3496 | 2300.3333 | 2291.3809        | 2273.3704 | 2274.3538        | 1159.1801       | 1146.1904       | 21 |    |
| 4  | 44.0499  | 452.2587         | 434.2481  | 435.2317         | 424.2637  | 406.2531         | 407.2367  | 469.2857  | 451.2751  | 452.2587         | 468.2779  | 226.6293  | 212.6318        | 235.1428  | A         | 2161.2590 | 2143.2485 | 2144.2322 | 2135.2798        | 2117.2693 | 2118.2527        | 1081.1295       | 1068.1399       | 20 |    |
| 5  | 70.0656  | 549.3114         | 531.3008  | 532.2844         | 521.3164  | 503.3058         | 504.2894  | 566.3384  | 548.3279  | 549.3114         | 565.3306  | 275.1557  | 261.1582        | 283.6692  | P         | 2090.2219 | 2072.2114 | 2073.1951 | 2064.2427        | 2046.2322 | 2047.2158        | 1045.6110       | 1032.6213       | 19 |    |
| 6  | 30.0343  | 606.3329         | 588.3223  | 589.3059         | 578.3379  | 560.3273         | 561.3109  | 623.3599  | 605.3494  | 606.3329         | 622.3521  | 303.6664  | 289.6689        | 312.1800  | G         | 1993.1692 | 1975.1586 | 1976.1422 | 1967.1898        | 1949.1793 | 1950.1628        | 997.0846        | 984.0949        | 18 |    |
| 7  | 44.0499  | <b>677.3712</b>  | 659.3594  | 660.3430         | 649.3750  | 631.3644         | 632.3480  | 694.3970  | 676.3865  | <b>677.3712</b>  | 693.3892  | 339.1850  | 325.1875        | 347.6985  | A         | 1936.1478 | 1918.1372 | 1919.1208 | 1910.1685        | 1892.1580 | 1893.1415        | 968.5739        | 955.5842        | 17 |    |
| 8  | 72.0812  | <b>776.4396</b>  | 758.4279  | 759.4114         | 748.4434  | 730.4329         | 731.4164  | 793.4655  | 775.4549  | <b>776.4396</b>  | 792.4576  | 388.7192  | 374.7217        | 397.2327  | V         | 1865.1107 | 1847.1001 | 1848.0837 | 1839.1313        | 1821.1208 | 1822.1044        | 933.0554        | 920.0657        | 16 |    |
| 9  | 86.0969  | <b>889.5276</b>  | 871.5119  | 872.4955         | 861.5275  | 843.5169         | 844.5005  | 906.5495  | 888.5389  | <b>889.5276</b>  | 905.5416  | 445.2612  | 431.2637        | 453.7747  | L         | 1766.0422 | 1748.0316 | 1749.0153 | <b>1740.0634</b> | 1722.0524 | 1723.0359        | 883.5211        | 870.5314        | 15 |    |
| 10 | 101.0714 | <b>1017.5828</b> | 999.5705  | 1000.5541        | 989.5861  | 971.5755         | 972.5591  | 1034.6080 | 1016.5975 | <b>1017.5828</b> | 1033.6002 | 509.2905  | 495.2930        | 517.8040  | Q         | 1652.9581 | 1634.9475 | 1635.9312 | <b>1626.9777</b> | 1608.9683 | <b>1609.9484</b> | 826.9791        | 813.9894        | 14 |    |
| 11 | 86.0969  | 1130.6652        | 1112.6547 | 1113.6382        | 1102.6702 | 1084.6597        | 1085.6432 | 1147.6921 | 1129.6816 | 1130.6652        | 1146.6843 | 565.8326  | 551.8351        | 574.3461  | I         | 1524.8997 | 1506.8890 | 1507.8727 | <b>1498.9198</b> | 1480.9098 | 1481.8933        | 762.9498        | 749.9601        | 13 |    |
| 12 | 102.0554 | 1259.7076        | 1241.6971 | 1242.6807        | 1231.7126 | 1213.7021        | 1214.6857 | 1276.7346 | 1258.7241 | 1259.7076        | 1275.7268 | 630.3538  | <b>616.3845</b> | 638.8673  | E         | 1411.8156 | 1393.8049 | 1394.7886 | <b>1385.8340</b> | 1367.8257 | 1368.8092        | <b>706.3616</b> | 693.4181        | 12 |    |
| 13 | 44.0499  | 1330.7448        | 1312.7343 | 1313.7178        | 1302.7498 | 1284.7393        | 1285.7228 | 1347.7717 | 1329.7612 | 1330.7448        | 1346.7639 | 665.8724  | 651.8749        | 674.3859  | A         | 1282.7729 | 1264.7623 | 1265.7460 | 1256.7936        | 1238.7831 | 1239.7666        | 641.8865        | 628.8968        | 11 |    |
| 14 | 86.0969  | 1443.8289        | 1425.8184 | 1426.8019        | 1415.8339 | <b>1397.8193</b> | 1398.8069 | 1460.8558 | 1442.8453 | 1443.8289        | 1459.8480 | 722.4144  | 708.4169        | 730.9279  | L         | 1211.7358 | 1193.7252 | 1194.7089 | 1185.7565        | 1167.7460 | 1168.7295        | 606.3679        | <b>593.3770</b> | 10 |    |
| 15 | 101.0714 | 1571.8875        | 1553.8770 | 1554.8605        | 1543.8925 | 1525.8820        | 1526.8655 | 1588.9144 | 1570.9039 | 1571.8875        | 1587.9066 | 786.4437  | 772.4462        | 794.9572  | Q         | 1098.6517 | 1080.6411 | 1081.6248 | 1072.6724        | 1054.6619 | 1055.6454        | 549.8259        | 536.8362        | 9  |    |
| 16 | 102.0554 | 1700.9301        | 1682.9196 | <b>1683.9368</b> | 1672.9351 | 1654.9246        | 1655.9081 | 1717.9570 | 1699.9465 | 1700.9301        | 1716.9492 | 850.9650  | 836.9675        | 859.4785  | E         | 970.5932  | 952.5826  | 953.5662  | 944.6138         | 926.6033  | 927.5869         | 485.7966        | 472.8069        | 8  |    |
| 17 | 72.0812  | 1799.9984        | 1781.9879 | 1782.9714        | 1772.0034 | 1753.9929        | 1754.9764 | 1817.0254 | 1799.0149 | 1799.9984        | 1816.0176 | 900.4992  | 886.5017        | 909.0127  | V         | 841.5506  | 823.5400  | 824.5236  | 815.5712         | 797.5607  | 798.5443         | 421.2753        | 408.2856        | 7  |    |
| 18 | 86.0969  | 1913.0825        | 1895.0720 | 1896.0555        | 1885.0875 | 1867.0770        | 1868.0605 | 1930.1095 | 1912.0990 | 1913.0825        | 1929.1017 | 957.0413  | 943.0438        | 965.5547  | L         | 742.4822  | 724.4716  | 725.4552  | 716.5028         | 698.4922  | 699.4758         | 371.7411        | 358.7514        | 6  |    |
| 19 | 101.1078 | 2041.1775        | 2023.1670 | 2024.1505        | 2013.1825 | 1995.1720        | 1996.1555 | 2058.2046 | 2040.1940 | 2041.1775        | 2057.1968 | 1021.0887 | 1007.0912       | 1029.6023 | K         | 629.3981  | 611.3876  | 612.3711  | 603.4188         | 585.4082  | 586.3918         | 315.1991        | 302.2094        | 5  |    |
| 20 | 101.1078 | 2169.2725        | 2151.2620 | 2152.2454        | 2141.2776 | 2123.2668        | 2124.2505 | 2186.2996 | 2168.2888 | 2169.2725        | 2185.2917 | 1085.1362 | 1071.1388       | 1093.6498 | K         | 501.3032  | 483.2926  | 484.2762  | 475.3238         | 457.3133  | 458.2968         | 251.1516        | 238.1619        | 4  |    |
| 21 | 86.0969  | 2282.3564        | 2264.3459 | 2265.3293        | 2254.3616 | 2236.3508        | 2237.3345 | 2299.3835 | 2281.3728 | 2282.3564        | 2298.3757 | 1141.6782 | 1127.6808       | 1150.1918 | L         | 373.2083  | 355.1977  | 356.1812  | 347.2289         | 329.2183  | 330.2019         | 187.1041        | 174.1144        | 3  |    |
| 22 | 101.1078 | 2410.4514        | 2392.4409 | 2393.4243        | 2382.4565 | 2364.4458        | 2365.4294 | 2427.4785 | 2409.4678 | 2410.4514        | 2426.4707 | 1205.7257 | 1191.7283       | 1214.2393 | K         | 260.1242  | 242.1136  | 243.0972  | 234.1448         | 216.1343  | 217.1178         | 130.5621        | 117.5724        | 2  |    |
| 23 | 60.0449  |                  |           |                  |           |                  |           |           |           |                  |           |           |                 |           | S         | 132.0292  | 114.0187  | 115.0022  | 106.0499         | 88.0393   | 89.0229          | 66.5146         | 53.5249         | 1  |    |

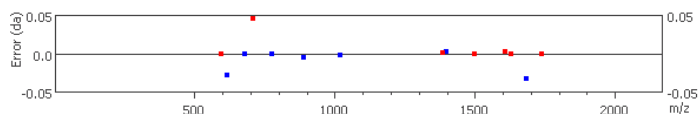

R.Q(-17.03)ERPPLQQPPHRD.K

m/z=527.6022

Error=-0.3ppm

Z=3

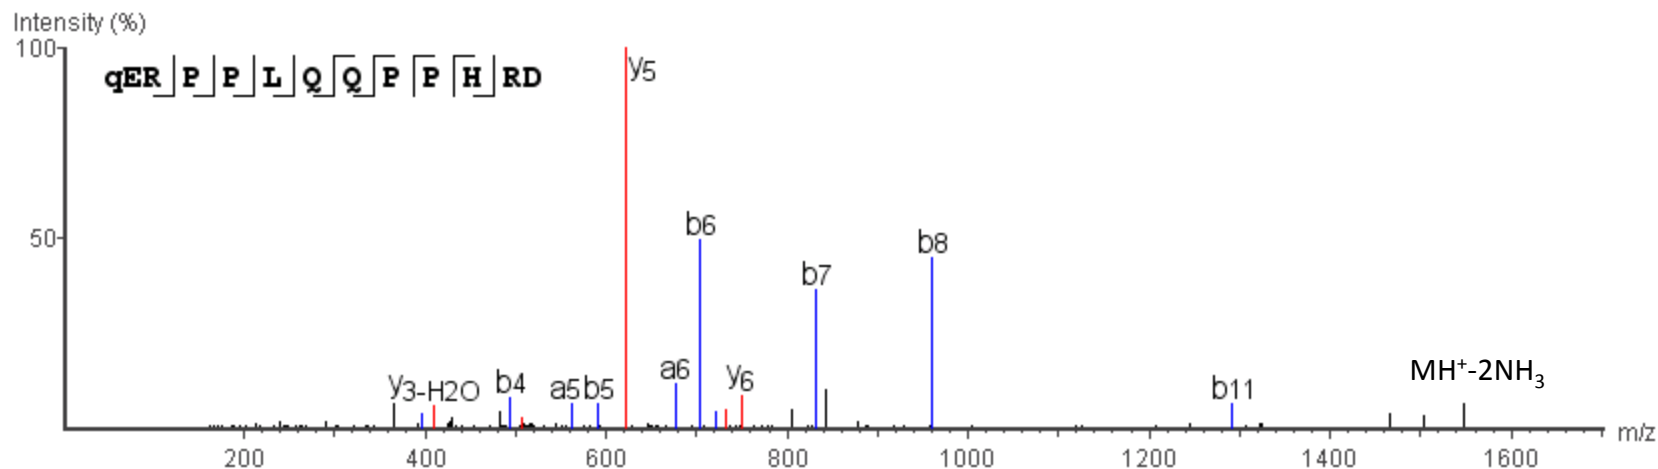

| #  | Immonium | b       | b-H2O   | b-NH3   | a       | a-H2O   | a-NH3   | c       | c-H2O   | c-NH3   | b(2+)  | a(2+)  | c(2+)  | Seq       | x       | x-H2O   | x-NH3   | y       | y-H2O   | y-NH3   | x(2+)  | y(2+)  | #  |    |
|----|----------|---------|---------|---------|---------|---------|---------|---------|---------|---------|--------|--------|--------|-----------|---------|---------|---------|---------|---------|---------|--------|--------|----|----|
| 1  | 84.04    | 112.04  | 94.03   | 95.01   | 84.04   | 66.03   | 67.01   | 129.06  | 111.05  | 112.04  | 56.52  | 42.52  | 65.03  | Q(-17.03) |         |         |         |         |         |         |        |        |    | 13 |
| 2  | 102.06   | 241.08  | 223.07  | 224.05  | 213.08  | 195.07  | 196.06  | 258.11  | 240.10  | 241.08  | 121.04 | 107.04 | 129.55 | E         | 1495.74 | 1477.73 | 1478.71 | 1469.76 | 1451.75 | 1452.73 | 748.37 | 735.38 | 12 |    |
| 3  | 129.11   | 397.18  | 379.17  | 380.15  | 369.19  | 351.17  | 352.16  | 414.21  | 396.20  | 397.18  | 199.09 | 185.09 | 207.60 | R         | 1366.70 | 1348.69 | 1349.67 | 1340.72 | 1322.71 | 1323.69 | 683.85 | 670.86 | 11 |    |
| 4  | 70.07    | 494.23  | 476.22  | 477.21  | 466.24  | 448.23  | 449.21  | 511.26  | 493.25  | 494.23  | 247.62 | 233.62 | 256.13 | P         | 1210.60 | 1192.59 | 1193.57 | 1184.62 | 1166.61 | 1167.59 | 605.80 | 592.81 | 10 |    |
| 5  | 70.07    | 591.29  | 573.28  | 574.26  | 563.29  | 545.28  | 546.26  | 608.31  | 590.30  | 591.29  | 296.14 | 282.15 | 304.66 | P         | 1113.54 | 1095.53 | 1096.52 | 1087.56 | 1069.55 | 1070.54 | 557.27 | 544.28 | 9  |    |
| 6  | 86.10    | 704.37  | 686.36  | 687.34  | 676.38  | 658.36  | 659.35  | 721.40  | 703.39  | 704.37  | 352.68 | 338.69 | 361.20 | L         | 1016.49 | 998.48  | 999.46  | 990.51  | 972.50  | 973.48  | 508.75 | 495.76 | 8  |    |
| 7  | 101.07   | 832.43  | 814.42  | 815.40  | 804.43  | 786.42  | 787.41  | 849.46  | 831.44  | 832.43  | 416.71 | 402.72 | 425.23 | Q         | 903.41  | 885.40  | 886.38  | 877.43  | 859.42  | 860.40  | 452.20 | 439.21 | 7  |    |
| 8  | 101.07   | 960.49  | 942.48  | 943.46  | 932.49  | 914.48  | 915.46  | 977.51  | 959.50  | 960.49  | 480.74 | 466.75 | 489.26 | Q         | 775.35  | 757.34  | 758.32  | 749.37  | 731.36  | 732.34  | 388.17 | 375.18 | 6  |    |
| 9  | 70.07    | 1057.54 | 1039.53 | 1040.51 | 1029.54 | 1011.53 | 1012.52 | 1074.57 | 1056.56 | 1057.54 | 529.27 | 515.27 | 537.78 | P         | 647.29  | 629.28  | 630.26  | 621.31  | 603.30  | 604.28  | 324.14 | 311.16 | 5  |    |
| 10 | 70.07    | 1154.59 | 1136.58 | 1137.57 | 1126.60 | 1108.59 | 1109.57 | 1171.62 | 1153.61 | 1154.59 | 577.80 | 563.80 | 586.31 | P         | 550.24  | 532.23  | 533.21  | 524.26  | 506.28  | 507.23  | 275.62 | 262.63 | 4  |    |
| 11 | 110.07   | 1291.65 | 1273.64 | 1274.62 | 1263.66 | 1245.65 | 1246.63 | 1308.68 | 1290.67 | 1291.65 | 646.33 | 632.33 | 654.84 | H         | 453.18  | 435.17  | 436.16  | 427.20  | 409.23  | 410.18  | 227.09 | 214.10 | 3  |    |
| 12 | 129.11   | 1447.75 | 1429.74 | 1430.73 | 1419.76 | 1401.75 | 1402.73 | 1464.78 | 1446.77 | 1447.75 | 724.38 | 710.38 | 732.89 | R         | 316.13  | 298.11  | 299.10  | 290.15  | 272.14  | 273.12  | 158.56 | 145.57 | 2  |    |
| 13 | 88.04    |         |         |         |         |         |         |         |         |         |        |        |        | D         | 160.02  | 142.01  | 143.00  | 134.04  | 116.03  | 117.02  | 80.51  | 67.52  | 1  |    |

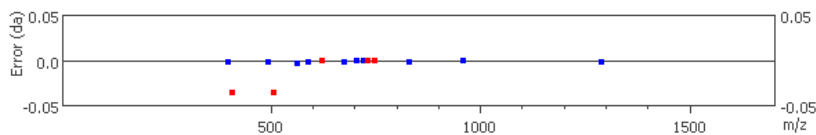





R.YGGFMRRV(-.98).G

m/z=492.7639

Error=1ppm

Z=2

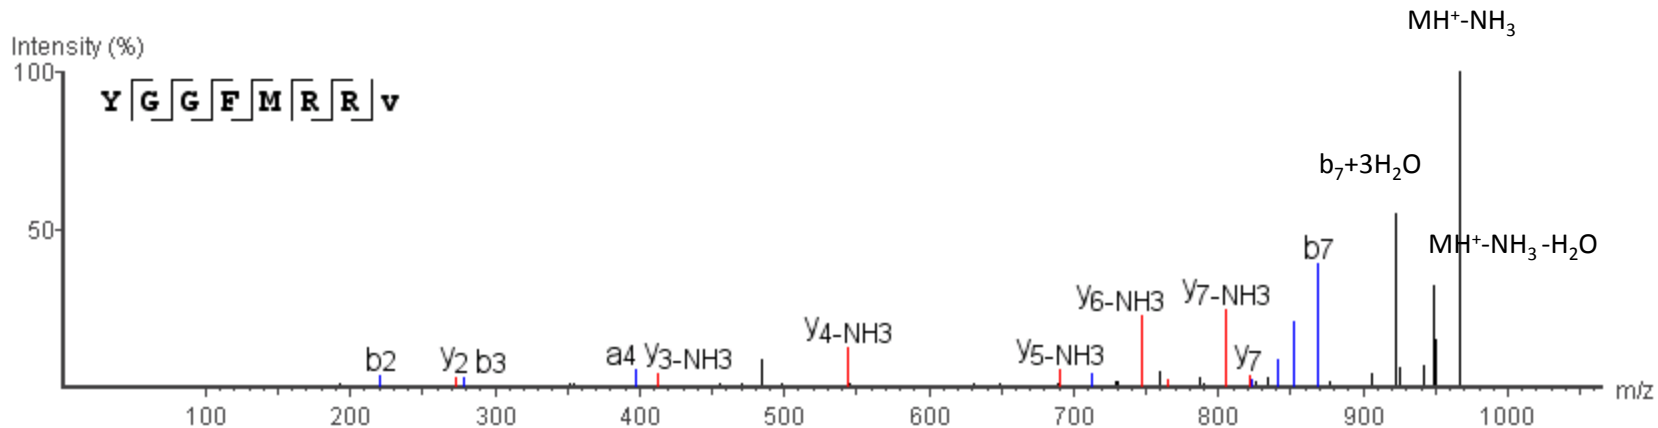

| # | Immonium | b                        | b-H2O    | b-NH3                    | a                        | a-H2O    | a-NH3                    | c        | c-H2O    | c-NH3                    | c-H      | b (2+)   | a (2+)   | c (2+)   | Seq     | x        | x-H2O    | x-NH3    | y                        | y-H2O    | y-NH3                    | x (2+)   | y (2+)   | # |   |
|---|----------|--------------------------|----------|--------------------------|--------------------------|----------|--------------------------|----------|----------|--------------------------|----------|----------|----------|----------|---------|----------|----------|----------|--------------------------|----------|--------------------------|----------|----------|---|---|
| 1 | 136.0761 | 164.0712                 | 146.0606 | 147.0441                 | 136.0761                 | 118.0656 | 119.0491                 | 181.0981 | 163.0876 | 164.0712                 | 180.0903 | 82.5356  | 68.5381  | 91.0491  | Y       |          |          |          |                          |          |                          |          |          |   | 8 |
| 2 | 30.0343  | <a href="#">221.0920</a> | 203.0820 | 204.0656                 | 193.0976                 | 175.0870 | 176.0706                 | 238.1196 | 220.1090 | <a href="#">221.0920</a> | 237.1118 | 111.0463 | 97.0488  | 119.5598 | G       | 847.4396 | 829.4291 | 830.4126 | <a href="#">821.4558</a> | 803.4497 | <a href="#">804.4283</a> | 424.2198 | 411.2301 | 7 |   |
| 3 | 30.0343  | <a href="#">278.1142</a> | 260.1035 | 261.0871                 | 250.1191                 | 232.1085 | 233.0921                 | 295.1411 | 277.1305 | <a href="#">278.1142</a> | 294.1333 | 139.5570 | 125.5595 | 148.0705 | G       | 790.4182 | 772.4076 | 773.3911 | <a href="#">764.4358</a> | 746.4282 | <a href="#">747.4075</a> | 395.7091 | 382.7194 | 6 |   |
| 4 | 120.0812 | 425.1825                 | 407.1719 | 408.1555                 | <a href="#">397.1868</a> | 379.1769 | 380.1605                 | 442.2095 | 424.1989 | 425.1825                 | 441.2017 | 213.0912 | 199.0937 | 221.6047 | F       | 733.3967 | 715.3862 | 716.3698 | 707.4174                 | 689.4068 | <a href="#">690.3855</a> | 367.1984 | 354.2087 | 5 |   |
| 5 | 104.0533 | 556.2230                 | 538.2124 | 539.1960                 | 528.2280                 | 510.2174 | 511.2010                 | 573.2500 | 555.2394 | 556.2230                 | 572.2421 | 278.6115 | 264.6140 | 287.1250 | M       | 586.3283 | 568.3177 | 569.3013 | 560.3489                 | 542.3384 | <a href="#">543.3179</a> | 293.6642 | 280.6745 | 4 |   |
| 6 | 129.1139 | <a href="#">712.3218</a> | 694.3135 | 695.2971                 | 684.3291                 | 666.3185 | 667.3021                 | 729.3511 | 711.3406 | <a href="#">712.3218</a> | 728.3433 | 356.6620 | 342.6646 | 365.1756 | R       | 455.2878 | 437.2773 | 438.2608 | 429.3084                 | 411.2979 | <a href="#">412.2780</a> | 228.1439 | 215.1542 | 3 |   |
| 7 | 129.1139 | <a href="#">868.4235</a> | 850.4146 | <a href="#">851.3971</a> | <a href="#">840.4286</a> | 822.4196 | <a href="#">823.4019</a> | 885.4522 | 867.4417 | <a href="#">868.4235</a> | 884.4443 | 434.7126 | 420.7151 | 443.2261 | R       | 299.1867 | 281.1761 | 282.1597 | <a href="#">273.2035</a> | 255.1968 | 256.1804                 | 150.0934 | 137.1037 | 2 |   |
| 8 | 71.1012  |                          |          |                          |                          |          |                          |          |          |                          |          |          |          |          | V(-.98) | 143.0856 | 125.0750 | 126.0586 | 117.1062                 | 99.0957  | 100.0792                 | 72.0428  | 59.0531  | 1 |   |

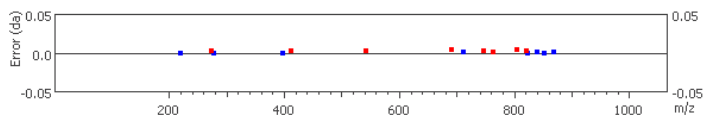

YGGFM(+15.99).R

m/z=590.2274

Error=-0.9ppm

Z=1

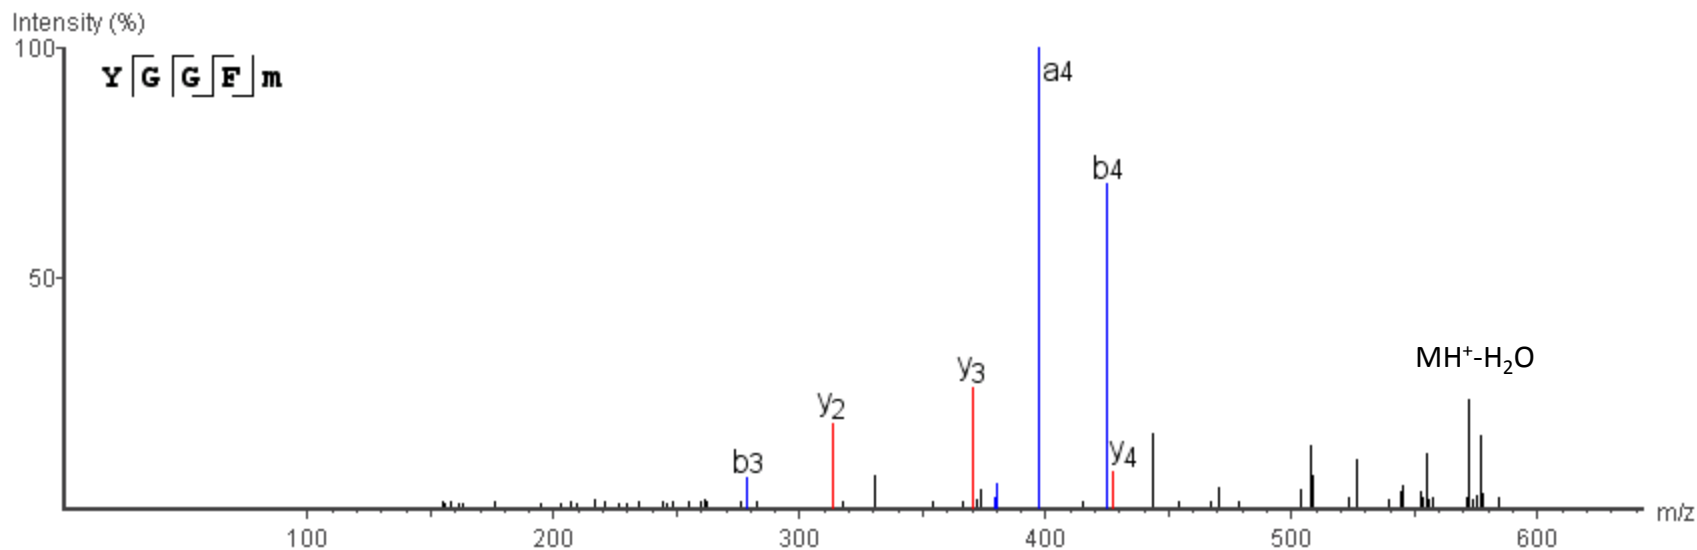

| # | Immonium | b        | b-H2O    | b-NH3    | a        | a-H2O    | a-NH3    | c        | c-H2O    | c-NH3    | c-H      | b (2+)   | a (2+)   | c (2+)   | Seq       | x        | x-H2O    | x-NH3    | y        | y-H2O    | y-NH3    | x (2+)   | y (2+)   | # |   |
|---|----------|----------|----------|----------|----------|----------|----------|----------|----------|----------|----------|----------|----------|----------|-----------|----------|----------|----------|----------|----------|----------|----------|----------|---|---|
| 1 | 136.0761 | 164.0712 | 146.0606 | 147.0441 | 136.0761 | 118.0656 | 119.0491 | 181.0981 | 163.0876 | 164.0712 | 180.0903 | 82.5356  | 68.5381  | 91.0491  | Y         |          |          |          |          |          |          |          |          |   | 5 |
| 2 | 30.0343  | 221.0926 | 203.0820 | 204.0656 | 193.0976 | 175.0870 | 176.0706 | 238.1196 | 220.1090 | 221.0926 | 237.1118 | 111.0463 | 97.0488  | 119.5598 | G         | 453.1390 | 435.1285 | 436.1120 | 427.1641 | 409.1491 | 410.1327 | 227.0695 | 214.0798 | 4 |   |
| 3 | 30.0343  | 278.1135 | 260.1035 | 261.0871 | 250.1191 | 232.1085 | 233.0921 | 295.1411 | 277.1305 | 278.1135 | 294.1333 | 139.5570 | 125.5595 | 148.0705 | G         | 396.1176 | 378.1070 | 379.0905 | 370.1432 | 352.1276 | 353.1112 | 198.5588 | 185.5691 | 3 |   |
| 4 | 120.0812 | 425.1815 | 407.1719 | 408.1555 | 397.1869 | 379.2192 | 380.1603 | 442.2095 | 424.1989 | 425.1815 | 441.2017 | 213.0912 | 199.0937 | 221.6047 | F         | 339.0961 | 321.0855 | 322.0691 | 313.1215 | 295.1062 | 296.0898 | 170.0480 | 157.0584 | 2 |   |
| 5 | 120.0433 |          |          |          |          |          |          |          |          |          |          |          |          |          | M(+15.99) | 192.0277 | 174.0171 | 175.0007 | 166.0483 | 148.0378 | 149.0213 | 96.5138  | 83.5242  | 1 |   |

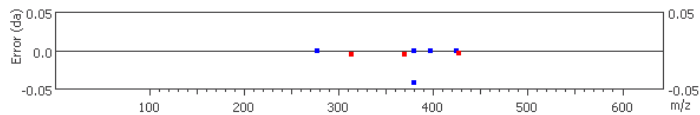

P.Q(-17.03)LEDEAKELQ.K

m/z=593.2841

Error=2ppm

Z=2

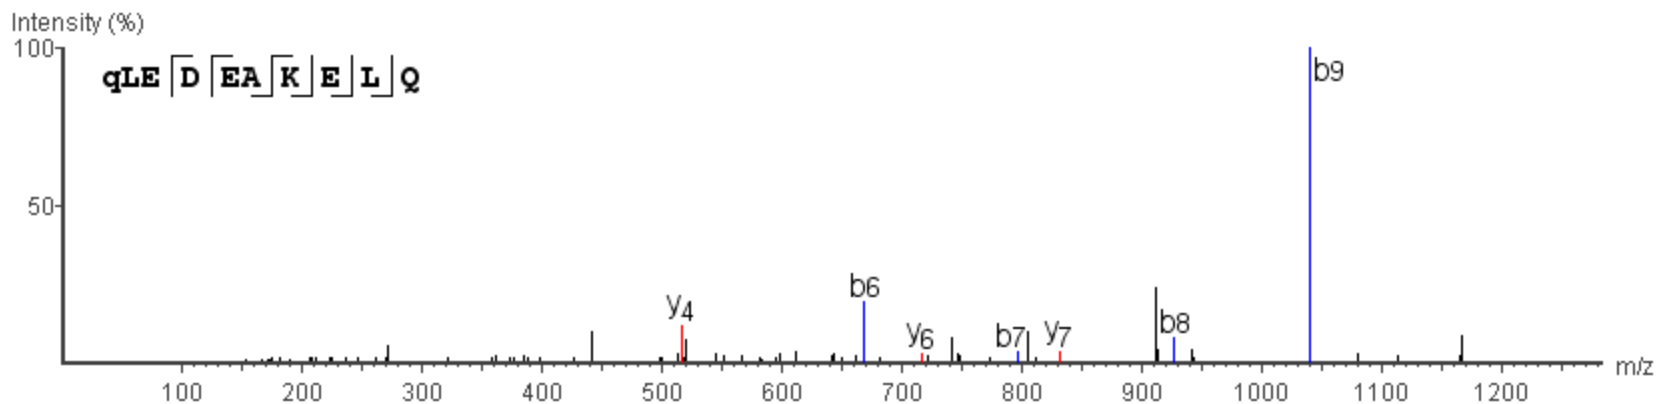

| #  | Immonium | b         | b-H2O     | b-NH3     | a         | a-H2O    | a-NH3    | c         | c-H2O     | c-NH3     | c-H       | b (2+)   | a (2+)   | c (2+)   | Seq       | x         | x-H2O     | x-NH3     | y         | y-H2O     | y-NH3     | x (2+)   | y (2+)   | # |    |
|----|----------|-----------|-----------|-----------|-----------|----------|----------|-----------|-----------|-----------|-----------|----------|----------|----------|-----------|-----------|-----------|-----------|-----------|-----------|-----------|----------|----------|---|----|
| 1  | 84.0414  | 112.0364  | 94.0258   | 95.0094   | 84.0414   | 66.0308  | 67.0144  | 129.0634  | 111.0528  | 112.0364  | 128.0556  | 56.5182  | 42.5207  | 65.0317  | Q(-17.03) |           |           |           |           |           |           |          |          |   | 10 |
| 2  | 86.0969  | 225.1205  | 207.1099  | 208.0935  | 197.1255  | 179.1149 | 180.0985 | 242.1475  | 224.1369  | 225.1205  | 241.1396  | 113.0602 | 99.0627  | 121.5737 | L         | 1100.5106 | 1082.5000 | 1083.4836 | 1074.5312 | 1056.5208 | 1057.5043 | 550.7553 | 537.7656 | 9 |    |
| 3  | 102.0554 | 354.1630  | 336.1525  | 337.1360  | 326.1680  | 308.1575 | 309.1411 | 371.1900  | 353.1795  | 354.1630  | 370.1822  | 177.5815 | 163.5840 | 186.0950 | E         | 987.4266  | 969.4160  | 970.3995  | 961.4472  | 943.4366  | 944.4202  | 494.2133 | 481.2236 | 8 |    |
| 4  | 88.0398  | 469.1900  | 451.1794  | 452.1630  | 441.1950  | 423.1844 | 424.1680 | 486.2170  | 468.2064  | 469.1900  | 485.2092  | 235.0950 | 221.0975 | 243.6085 | D         | 858.3840  | 840.3735  | 841.3571  | 832.4067  | 814.3941  | 815.3777  | 429.6920 | 416.7023 | 7 |    |
| 5  | 102.0554 | 598.2325  | 580.2220  | 581.2056  | 570.2375  | 552.2270 | 553.2106 | 615.2596  | 597.2490  | 598.2325  | 614.2517  | 299.6163 | 285.6188 | 308.1298 | E         | 743.3571  | 725.3465  | 726.3301  | 717.3762  | 699.3671  | 700.3507  | 372.1785 | 359.1888 | 6 |    |
| 6  | 44.0499  | 669.2709  | 651.2591  | 652.2427  | 641.2747  | 623.2641 | 624.2477 | 686.2967  | 668.2861  | 669.2709  | 685.2888  | 335.1348 | 321.1373 | 343.6483 | A         | 614.3145  | 596.3039  | 597.2875  | 588.3351  | 570.3245  | 571.3081  | 307.6572 | 294.6675 | 5 |    |
| 7  | 101.1078 | 797.3687  | 779.3541  | 780.3376  | 769.3696  | 751.3591 | 752.3427 | 814.3917  | 796.3811  | 797.3687  | 813.3838  | 399.1823 | 385.1848 | 407.6958 | K         | 543.2773  | 525.2668  | 526.2504  | 517.2975  | 499.2874  | 500.2710  | 272.1387 | 259.1490 | 4 |    |
| 8  | 102.0554 | 926.4102  | 908.3967  | 909.3802  | 898.4122  | 880.4017 | 881.3853 | 943.4343  | 925.4237  | 926.4102  | 942.4264  | 463.7036 | 449.7061 | 472.2171 | E         | 415.1824  | 397.1719  | 398.1554  | 389.2031  | 371.1925  | 372.1761  | 208.0912 | 195.1015 | 3 |    |
| 9  | 86.0969  | 1039.4932 | 1021.4808 | 1022.4644 | 1011.4963 | 993.4858 | 994.4694 | 1056.5183 | 1038.5078 | 1039.4932 | 1055.5105 | 520.2457 | 506.2482 | 528.7592 | L         | 286.1398  | 268.1293  | 269.1128  | 260.1605  | 242.1499  | 243.1335  | 143.5699 | 130.5802 | 2 |    |
| 10 | 101.0714 |           |           |           |           |          |          |           |           |           |           |          |          | Q        | 173.0558  | 155.0452  | 156.0288  | 147.0764  | 129.0659  | 130.0494  | 87.0279   | 74.0382  | 1        |   |    |

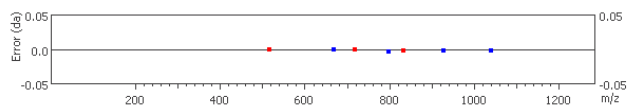

m/z=704.3971

Error=-0.9ppm

R.Q(-17.03)FKVVT.R

Z=1

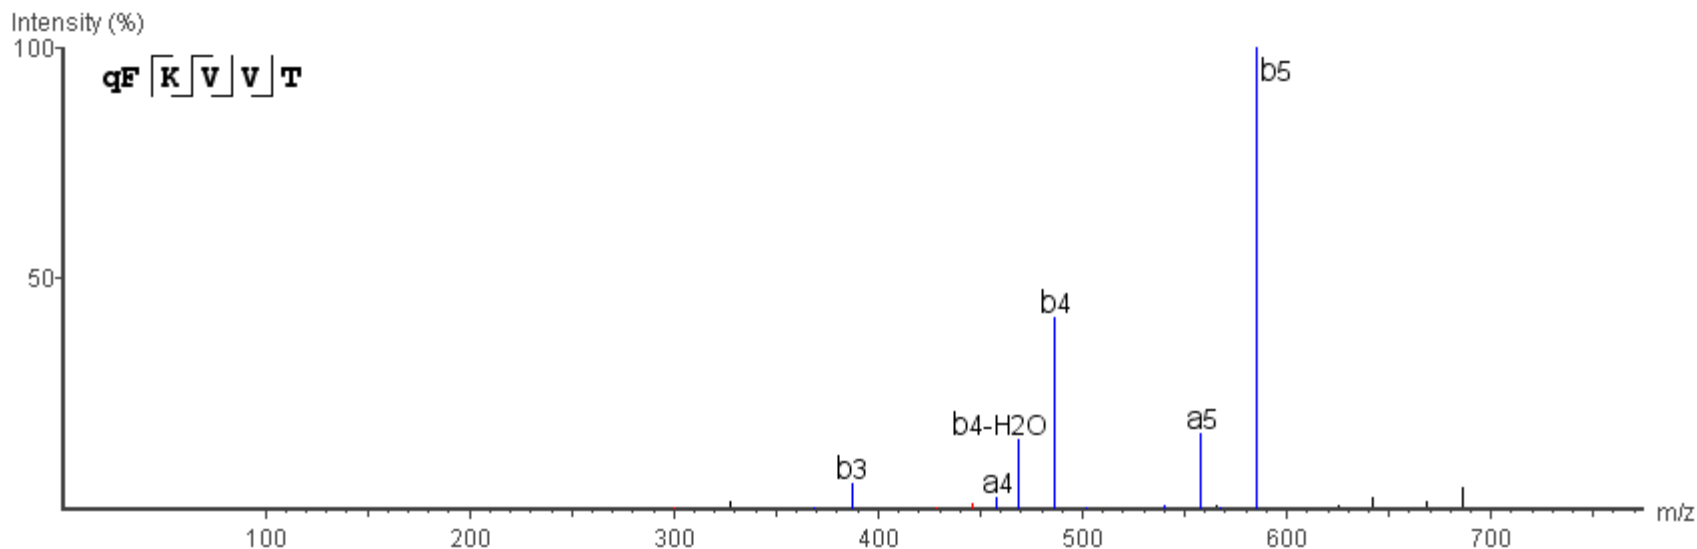

| # | Immonium | b        | b-H2O    | b-NH3    | a        | a-H2O    | a-NH3    | c        | c-H2O    | c-NH3    | c-H      | b (2+)   | a (2+)   | c (2+)   | Seq       | x        | x-H2O    | x-NH3    | y        | y-H2O    | y-NH3    | x (2+)   | y (2+)   | # |   |
|---|----------|----------|----------|----------|----------|----------|----------|----------|----------|----------|----------|----------|----------|----------|-----------|----------|----------|----------|----------|----------|----------|----------|----------|---|---|
| 1 | 84.0414  | 112.0364 | 94.0258  | 95.0094  | 84.0414  | 66.0308  | 67.0144  | 129.0634 | 111.0528 | 112.0364 | 128.0556 | 56.5182  | 42.5207  | 65.0317  | Q(-17.03) |          |          |          |          |          |          |          |          |   | 6 |
| 2 | 120.0812 | 259.1048 | 241.0943 | 242.0778 | 231.1098 | 213.0992 | 214.0828 | 276.1318 | 258.1212 | 259.1048 | 275.1240 | 130.0524 | 116.0549 | 138.5659 | F         | 619.3451 | 601.3345 | 602.3181 | 593.3657 | 575.3552 | 576.3387 | 310.1725 | 297.1829 | 5 |   |
| 3 | 101.1078 | 387.2027 | 369.1892 | 370.1728 | 359.2048 | 341.1942 | 342.1778 | 404.2268 | 386.2162 | 387.2027 | 403.2190 | 194.0999 | 180.1024 | 202.6134 | K         | 472.2767 | 454.2661 | 455.2497 | 446.2973 | 428.2867 | 429.2703 | 236.6383 | 223.6487 | 4 |   |
| 4 | 72.0812  | 486.2703 | 468.2599 | 469.2412 | 458.2753 | 440.2626 | 441.2462 | 503.2952 | 485.2846 | 486.2703 | 502.2874 | 243.6341 | 229.6366 | 252.1476 | V         | 344.1817 | 326.1711 | 327.1547 | 318.2023 | 300.1918 | 301.1754 | 172.5909 | 159.6012 | 3 |   |
| 5 | 72.0812  | 585.3384 | 567.3260 | 568.3096 | 557.3438 | 539.3310 | 540.3146 | 602.3636 | 584.3530 | 585.3384 | 601.3557 | 293.1683 | 279.1708 | 301.6818 | V         | 245.1133 | 227.1027 | 228.0863 | 219.1339 | 201.1234 | 202.1069 | 123.0566 | 110.0670 | 2 |   |
| 6 | 74.0605  |          |          |          |          |          |          |          |          |          |          |          |          |          | T         | 146.0449 | 128.0343 | 129.0179 | 120.0655 | 102.0550 | 103.0385 | 73.5224  | 60.5328  | 1 |   |

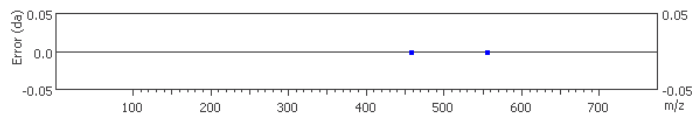

AEETAGGDGRPEPSPRE(-.98).G

m/z=941.9301

Error=0.3ppm

Z=2

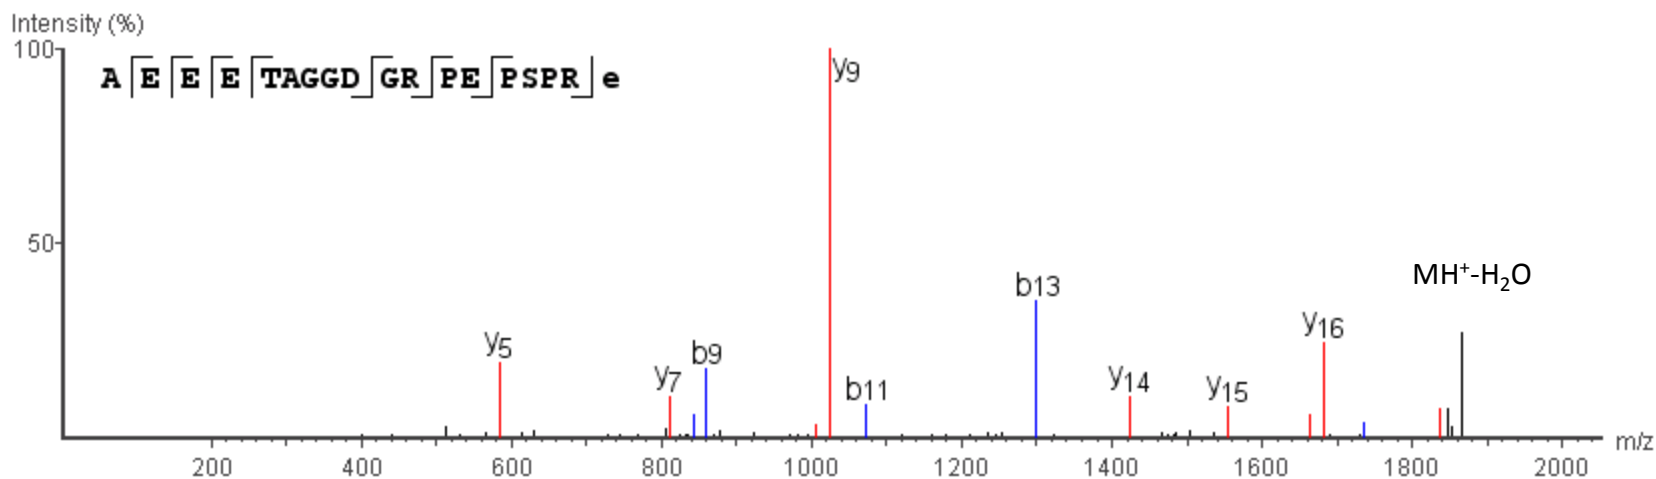

| #  | Immonium | b         | b-H2O     | b-NH3     | a         | a-H2O     | a-NH3     | c         | c-H2O     | c-NH3     | c-H       | b(2+)    | a(2+)    | c(2+)    | Seq     | x         | x-H2O     | x-NH3     | y         | y-H2O     | y-NH3     | x(2+)    | y(2+)    | #  |
|----|----------|-----------|-----------|-----------|-----------|-----------|-----------|-----------|-----------|-----------|-----------|----------|----------|----------|---------|-----------|-----------|-----------|-----------|-----------|-----------|----------|----------|----|
| 1  | 44.0499  | 72.0449   | 54.0344   | 55.0179   | 44.0499   | 26.0394   | 27.0229   | 89.0719   | 71.0614   | 72.0449   | 88.0641   | 36.5225  | 22.5250  | 45.0360  | A       |           |           |           |           |           |           |          |          | 18 |
| 2  | 102.0554 | 201.0875  | 183.0770  | 184.0605  | 173.0925  | 155.0820  | 156.0655  | 218.1145  | 200.1040  | 201.0875  | 217.1067  | 101.0438 | 87.0463  | 109.5573 | E       | 1837.8295 | 1819.7881 | 1820.7717 | 1811.8193 | 1793.8088 | 1794.7924 | 919.3994 | 906.4097 | 17 |
| 3  | 102.0554 | 330.1301  | 312.1195  | 313.1031  | 302.1351  | 284.1245  | 285.1081  | 347.1571  | 329.1465  | 330.1301  | 346.1493  | 165.5650 | 151.5676 | 174.0786 | E       | 1708.7562 | 1690.7456 | 1691.7292 | 1682.7711 | 1664.7621 | 1665.7499 | 854.8781 | 841.8884 | 16 |
| 4  | 102.0554 | 459.1727  | 441.1621  | 442.1457  | 431.1777  | 413.1671  | 414.1507  | 476.1997  | 458.1891  | 459.1727  | 475.1919  | 230.0863 | 216.0888 | 238.5998 | E       | 1579.7136 | 1561.7030 | 1562.6866 | 1553.7296 | 1535.7238 | 1536.7073 | 790.3568 | 777.3671 | 15 |
| 5  | 74.0605  | 560.2203  | 542.2098  | 543.1934  | 532.2253  | 514.2148  | 515.1984  | 577.2474  | 559.2368  | 560.2203  | 576.2395  | 280.6102 | 266.6127 | 289.1237 | T       | 1450.6710 | 1432.6604 | 1433.6440 | 1424.6871 | 1406.6812 | 1407.6647 | 725.8355 | 712.8458 | 14 |
| 6  | 44.0499  | 631.2574  | 613.2469  | 614.2305  | 603.2625  | 585.2519  | 586.2355  | 648.2845  | 630.2739  | 631.2574  | 647.2766  | 316.1287 | 302.1312 | 324.6422 | A       | 1349.6233 | 1331.6127 | 1332.5963 | 1323.6439 | 1305.6334 | 1306.6169 | 675.3116 | 662.3220 | 13 |
| 7  | 30.0343  | 688.2789  | 670.2684  | 671.2520  | 660.2839  | 642.2734  | 643.2570  | 705.3060  | 687.2954  | 688.2789  | 704.2981  | 344.6395 | 330.6420 | 353.1530 | G       | 1278.5862 | 1260.5756 | 1261.5592 | 1252.6068 | 1234.5963 | 1235.5798 | 639.7931 | 626.8034 | 12 |
| 8  | 30.0343  | 745.3004  | 727.2899  | 728.2734  | 717.3054  | 699.2949  | 700.2784  | 762.3275  | 744.3169  | 745.3004  | 761.3196  | 373.1502 | 359.1527 | 381.6637 | G       | 1221.5647 | 1203.5541 | 1204.5377 | 1195.5853 | 1177.5748 | 1178.5583 | 611.2823 | 598.2927 | 11 |
| 9  | 88.0398  | 860.3263  | 842.3153  | 843.3004  | 832.3323  | 814.3218  | 815.3054  | 877.3544  | 859.3438  | 860.3263  | 876.3465  | 430.6637 | 416.6662 | 439.1772 | D       | 1164.5433 | 1146.5327 | 1147.5164 | 1138.5640 | 1120.5535 | 1121.5370 | 582.7717 | 569.7820 | 10 |
| 10 | 30.0343  | 917.3488  | 899.3383  | 900.3218  | 889.3538  | 871.3433  | 872.3268  | 934.3759  | 916.3653  | 917.3488  | 933.3680  | 459.1744 | 445.1769 | 467.6879 | G       | 1049.5164 | 1031.5057 | 1032.4894 | 1023.5328 | 1005.5211 | 1006.5012 | 525.2582 | 512.2685 | 9  |
| 11 | 129.1139 | 1073.4492 | 1055.4395 | 1056.4230 | 1045.4550 | 1027.4445 | 1028.4280 | 1090.4769 | 1072.4664 | 1073.4492 | 1089.4691 | 537.2250 | 523.2275 | 545.7385 | R       | 992.4949  | 974.4843  | 975.4679  | 966.5155  | 948.5049  | 949.4885  | 496.7474 | 483.7578 | 8  |
| 12 | 70.0656  | 1170.5027 | 1152.4922 | 1153.4757 | 1142.5077 | 1124.4972 | 1125.4807 | 1187.5297 | 1169.5192 | 1170.5027 | 1186.5219 | 585.7513 | 571.7538 | 594.2648 | P       | 836.3938  | 818.3832  | 819.3668  | 810.4104  | 792.4039  | 793.3875  | 418.6969 | 405.7072 | 7  |
| 13 | 102.0554 | 1299.5458 | 1281.5348 | 1282.5183 | 1271.5503 | 1253.5398 | 1254.5233 | 1316.5723 | 1298.5618 | 1299.5458 | 1315.5645 | 650.2726 | 636.2751 | 658.7861 | E       | 739.3410  | 721.3304  | 722.3140  | 713.3616  | 695.3511  | 696.3347  | 370.1705 | 357.1808 | 6  |
| 14 | 70.0656  | 1396.5980 | 1378.5875 | 1379.5710 | 1368.6030 | 1350.5925 | 1351.5760 | 1413.6250 | 1395.6145 | 1396.5980 | 1412.6172 | 698.7990 | 684.8015 | 707.3125 | P       | 610.2985  | 592.2879  | 593.2715  | 584.3151  | 566.3085  | 567.2921  | 305.6492 | 292.6595 | 5  |
| 15 | 60.0449  | 1483.6300 | 1465.6195 | 1466.6030 | 1455.6350 | 1437.6245 | 1438.6080 | 1500.6570 | 1482.6465 | 1483.6300 | 1499.6492 | 742.3150 | 728.3175 | 750.8285 | S       | 513.2457  | 495.2351  | 496.2187  | 487.2663  | 469.2557  | 470.2393  | 257.1228 | 244.1331 | 4  |
| 16 | 70.0656  | 1580.6827 | 1562.6722 | 1563.6558 | 1552.6877 | 1534.6772 | 1535.6608 | 1597.7097 | 1579.6992 | 1580.6827 | 1596.7019 | 790.8414 | 776.8439 | 799.3549 | P       | 426.2137  | 408.2031  | 409.1866  | 400.2343  | 382.2237  | 383.2073  | 213.6068 | 200.6171 | 3  |
| 17 | 129.1139 | 1736.7839 | 1718.7734 | 1719.7570 | 1708.7889 | 1690.7784 | 1691.7620 | 1753.8109 | 1735.8004 | 1736.7839 | 1752.8031 | 868.8920 | 854.8945 | 877.4055 | R       | 329.1609  | 311.1503  | 312.1339  | 303.1815  | 285.1710  | 286.1545  | 165.0804 | 152.0908 | 2  |
| 18 | 101.0754 |           |           |           |           |           |           |           |           |           |           |          |          |          | E(-.98) | 173.0598  | 155.0492  | 156.0328  | 147.0804  | 129.0699  | 130.0534  | 87.0299  | 74.0402  | 1  |

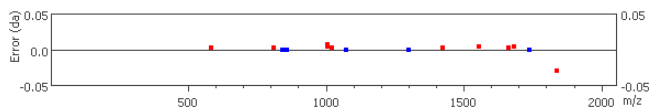

R.SYSMEHFRWGKPV(-.98).G

m/z=811.8967

Error=-2.2ppm

Z=2

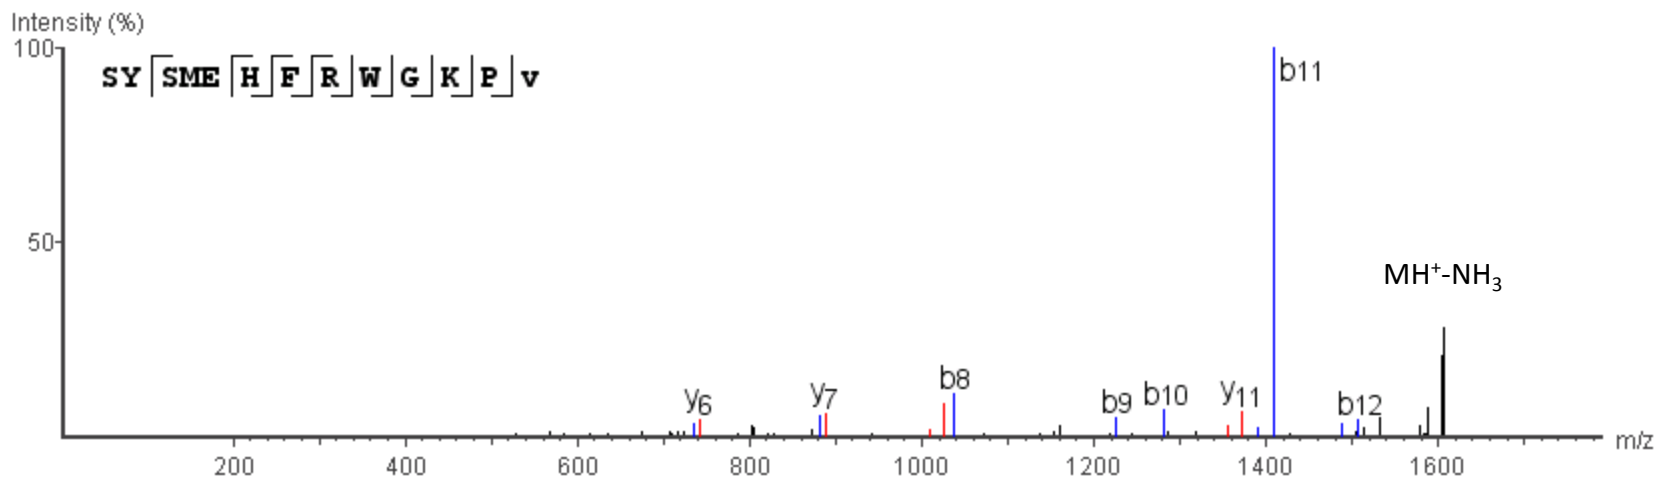

| #  | Immonium | b         | b-H2O     | b-NH3     | a         | a-H2O     | a-NH3     | c         | c-H2O     | c-NH3     | c-H       | b(2+)    | a(2+)    | c(2+)    | Seq     | x         | x-H2O     | x-NH3     | y         | y-H2O     | y-NH3     | x(2+)    | y(2+)    | #  |    |
|----|----------|-----------|-----------|-----------|-----------|-----------|-----------|-----------|-----------|-----------|-----------|----------|----------|----------|---------|-----------|-----------|-----------|-----------|-----------|-----------|----------|----------|----|----|
| 1  | 60.0449  | 88.0399   | 70.0293   | 71.0129   | 60.0449   | 42.0343   | 43.0179   | 105.0669  | 87.0563   | 88.0399   | 104.0590  | 44.5199  | 30.5224  | 53.0334  | S       |           |           |           |           |           |           |          |          |    | 13 |
| 2  | 136.0761 | 251.1032  | 233.0926  | 234.0762  | 223.1082  | 205.0976  | 206.0812  | 268.1302  | 250.1196  | 251.1032  | 267.1223  | 126.0516 | 112.0541 | 134.5651 | Y       | 1561.7410 | 1543.7303 | 1544.7140 | 1535.7616 | 1517.7511 | 1518.7346 | 781.3705 | 768.3808 | 12 |    |
| 3  | 60.0449  | 338.1352  | 320.1246  | 321.1082  | 310.1402  | 292.1296  | 293.1132  | 355.1622  | 337.1516  | 338.1352  | 354.1544  | 169.5676 | 155.5701 | 178.0811 | S       | 1398.6776 | 1380.6670 | 1381.6506 | 1372.6921 | 1354.6877 | 1355.6697 | 699.8388 | 686.8491 | 11 |    |
| 4  | 104.0533 | 469.1757  | 451.1651  | 452.1487  | 441.1807  | 423.1701  | 424.1537  | 486.2027  | 468.1921  | 469.1757  | 485.1949  | 235.0878 | 221.0903 | 243.6013 | M       | 1311.6456 | 1293.6350 | 1294.6187 | 1285.6663 | 1267.6558 | 1268.6393 | 656.3228 | 643.3331 | 10 |    |
| 5  | 102.0554 | 598.2183  | 580.2077  | 581.1913  | 570.2233  | 552.2127  | 553.1963  | 615.2453  | 597.2347  | 598.2183  | 614.2374  | 299.6091 | 285.6116 | 308.1227 | E       | 1180.6051 | 1162.5945 | 1163.5781 | 1154.6257 | 1136.6152 | 1137.5988 | 590.8026 | 577.8129 | 9  |    |
| 6  | 110.0717 | 735.2761  | 717.2667  | 718.2502  | 707.2822  | 689.2717  | 690.2552  | 752.3043  | 734.2937  | 735.2761  | 751.2964  | 368.1386 | 354.1411 | 376.6521 | H       | 1051.5625 | 1033.5519 | 1034.5355 | 1025.5793 | 1007.5726 | 1008.5544 | 526.2812 | 513.2916 | 8  |    |
| 7  | 120.0812 | 882.3441  | 864.3350  | 865.3186  | 854.3506  | 836.3400  | 837.3236  | 899.3726  | 881.3621  | 882.3441  | 898.3647  | 441.6728 | 427.6753 | 450.1863 | F       | 914.5036  | 896.4930  | 897.4766  | 888.5204  | 870.5137  | 871.4973  | 457.7518 | 444.7621 | 7  |    |
| 8  | 129.1139 | 1038.4460 | 1020.4361 | 1021.4197 | 1010.4517 | 992.4411  | 993.4247  | 1055.4736 | 1037.4631 | 1038.4460 | 1054.4658 | 519.7233 | 505.7258 | 528.2368 | R       | 767.4352  | 749.4246  | 750.4082  | 741.4512  | 723.4453  | 724.4288  | 384.2176 | 371.2279 | 6  |    |
| 9  | 159.0921 | 1224.5243 | 1206.5155 | 1207.4990 | 1196.5310 | 1178.5205 | 1179.5040 | 1241.5530 | 1223.5425 | 1224.5243 | 1240.5452 | 612.7630 | 598.7655 | 621.2765 | W       | 611.3341  | 593.3235  | 594.3071  | 585.3547  | 567.3442  | 568.3278  | 306.1671 | 293.1774 | 5  |    |
| 10 | 30.0343  | 1281.5468 | 1263.5370 | 1264.5205 | 1253.5525 | 1235.5420 | 1236.5255 | 1298.5745 | 1280.5640 | 1281.5468 | 1297.5667 | 641.2737 | 627.2762 | 649.7872 | G       | 425.2548  | 407.2442  | 408.2278  | 399.2754  | 381.2648  | 382.2484  | 213.1274 | 200.1377 | 4  |    |
| 11 | 101.1078 | 1409.6416 | 1391.6304 | 1392.6155 | 1381.6475 | 1363.6370 | 1364.6205 | 1426.6694 | 1408.6589 | 1409.6416 | 1425.6616 | 705.3212 | 691.3237 | 713.8347 | K       | 368.2333  | 350.2227  | 351.2063  | 342.2539  | 324.2434  | 325.2270  | 184.6167 | 171.6270 | 3  |    |
| 12 | 70.0656  | 1506.6936 | 1488.6827 | 1489.6682 | 1478.7002 | 1460.6897 | 1461.6732 | 1523.7222 | 1505.7117 | 1506.6936 | 1522.7144 | 753.8476 | 739.8501 | 762.3611 | P       | 240.1384  | 222.1278  | 223.1114  | 214.1590  | 196.1485  | 197.1320  | 120.5692 | 107.5795 | 2  |    |
| 13 | 71.1012  |           |           |           |           |           |           |           |           |           |           |          |          |          | W(-.98) | 143.0856  | 125.0750  | 126.0586  | 117.1062  | 99.0957   | 100.0792  | 72.0428  | 59.0531  | 1  |    |

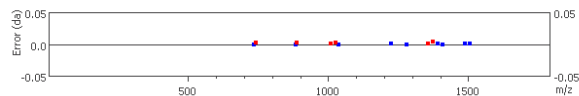

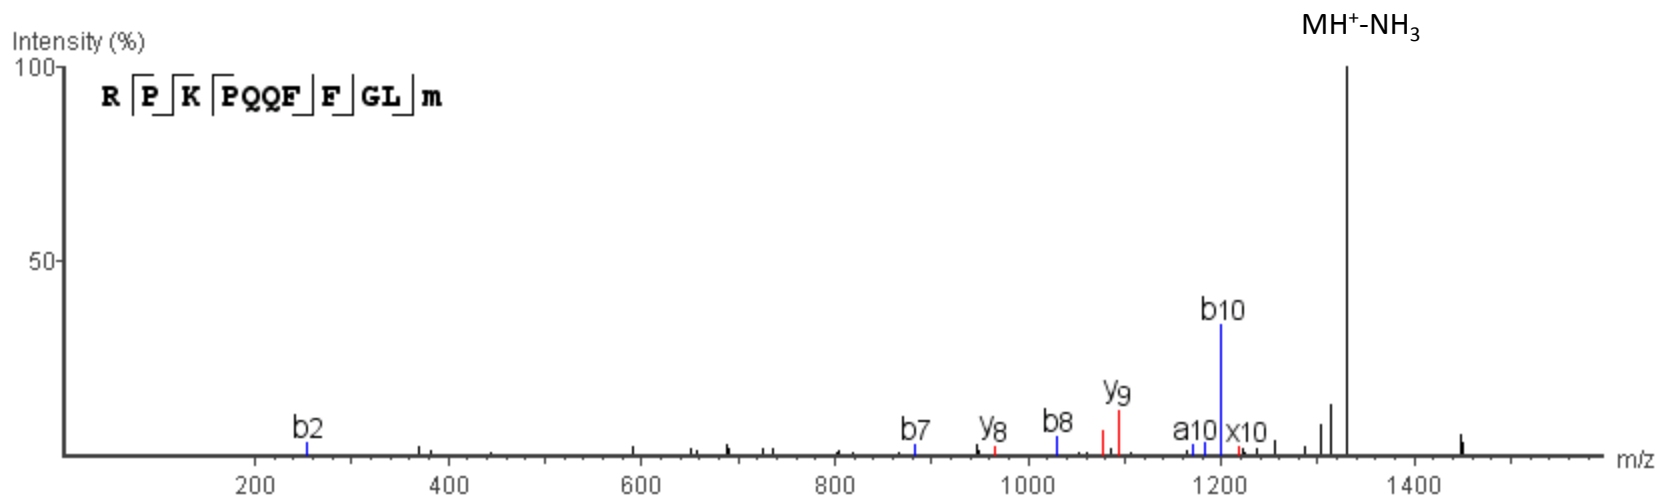

| #  | Immonium | b         | b-H2O     | b-NH3     | a         | a-H2O     | a-NH3     | c         | c-H2O     | c-NH3     | c-H       | b (2+)   | a (2+)   | c (2+)   | Seq     | x         | x-H2O     | x-NH3     | y         | y-H2O     | y-NH3     | x (2+)   | y (2+)   | #  |    |
|----|----------|-----------|-----------|-----------|-----------|-----------|-----------|-----------|-----------|-----------|-----------|----------|----------|----------|---------|-----------|-----------|-----------|-----------|-----------|-----------|----------|----------|----|----|
| 1  | 129.1139 | 157.1089  | 139.0984  | 140.0819  | 129.1139  | 111.1034  | 112.0869  | 174.1359  | 156.1254  | 157.1089  | 173.1281  | 79.0545  | 65.0570  | 87.5680  | R       |           |           |           |           |           |           |          |          |    | 11 |
| 2  | 70.0656  | 254.1611  | 236.1511  | 237.1347  | 226.1667  | 208.1561  | 209.1397  | 271.1887  | 253.1781  | 254.1611  | 270.1809  | 127.5808 | 113.5833 | 136.0943 | P       | 1217.6255 | 1199.6071 | 1200.5907 | 1191.6383 | 1173.6278 | 1174.6113 | 609.3088 | 596.3192 | 10 |    |
| 3  | 101.1078 | 382.2566  | 364.2461  | 365.2296  | 354.2616  | 336.2511  | 337.2346  | 399.2836  | 381.2731  | 382.2566  | 398.2758  | 191.6283 | 177.6308 | 200.1418 | K       | 1120.5649 | 1102.5543 | 1103.5380 | 1094.5795 | 1076.5751 | 1077.5520 | 560.7825 | 547.7928 | 9  |    |
| 4  | 70.0656  | 479.3094  | 461.2988  | 462.2824  | 451.3144  | 433.3038  | 434.2874  | 496.3364  | 478.3258  | 479.3094  | 495.3286  | 240.1547 | 226.1572 | 248.6682 | P       | 992.4700  | 974.4594  | 975.4430  | 966.4857  | 948.4800  | 949.4636  | 496.7350 | 483.7453 | 8  |    |
| 5  | 101.0714 | 607.3680  | 589.3574  | 590.3410  | 579.3730  | 561.3624  | 562.3460  | 624.3950  | 606.3845  | 607.3680  | 623.3871  | 304.1840 | 290.1865 | 312.6975 | Q       | 895.4172  | 877.4066  | 878.3901  | 869.4378  | 851.4272  | 852.4108  | 448.2086 | 435.2189 | 7  |    |
| 6  | 101.0714 | 735.4265  | 717.4160  | 718.3995  | 707.4315  | 689.4210  | 690.4045  | 752.4536  | 734.4430  | 735.4265  | 751.4457  | 368.2133 | 354.2158 | 376.7268 | Q       | 767.3586  | 749.3480  | 750.3315  | 741.3792  | 723.3687  | 724.3522  | 384.1793 | 371.1896 | 6  |    |
| 7  | 120.0812 | 882.4916  | 864.4844  | 865.4680  | 854.4999  | 836.4894  | 837.4730  | 899.5220  | 881.5114  | 882.4916  | 898.5141  | 441.7475 | 427.7500 | 450.2610 | F       | 639.3000  | 621.2895  | 622.2731  | 613.3207  | 595.3101  | 596.2937  | 320.1500 | 307.1603 | 5  |    |
| 8  | 120.0812 | 1029.5608 | 1011.5528 | 1012.5364 | 1001.5684 | 983.5578  | 984.5414  | 1046.5903 | 1028.5798 | 1029.5608 | 1045.5825 | 515.2817 | 501.2842 | 523.7952 | F       | 492.2316  | 474.2211  | 475.2046  | 466.2523  | 448.2417  | 449.2253  | 246.6158 | 233.6261 | 4  |    |
| 9  | 30.0343  | 1086.5848 | 1068.5743 | 1069.5579 | 1058.5898 | 1040.5793 | 1041.5629 | 1103.6118 | 1085.6013 | 1086.5848 | 1102.6040 | 543.7924 | 529.7949 | 552.3059 | G       | 345.1632  | 327.1526  | 328.1362  | 319.1838  | 301.1733  | 302.1569  | 173.0816 | 160.0919 | 3  |    |
| 10 | 86.0969  | 1199.6685 | 1181.6583 | 1182.6373 | 1171.6722 | 1153.6633 | 1154.6469 | 1216.6958 | 1198.6853 | 1199.6685 | 1215.6880 | 600.3344 | 586.3369 | 608.8479 | L       | 288.1418  | 270.1312  | 271.1147  | 262.1624  | 244.1518  | 245.1354  | 144.5709 | 131.5812 | 2  |    |
| 11 | 103.0733 |           |           |           |           |           |           |           |           |           |           |          |          |          | M(-.98) | 175.0577  | 157.0471  | 158.0307  | 149.0783  | 131.0678  | 132.0513  | 88.0288  | 75.0392  | 1  |    |

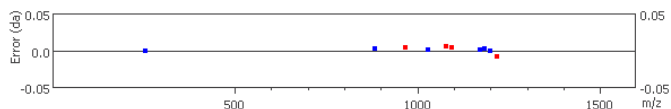

Y.FQNCPRG(-.98).G

m/z=410.6979

Error=0.4ppm

Z=2

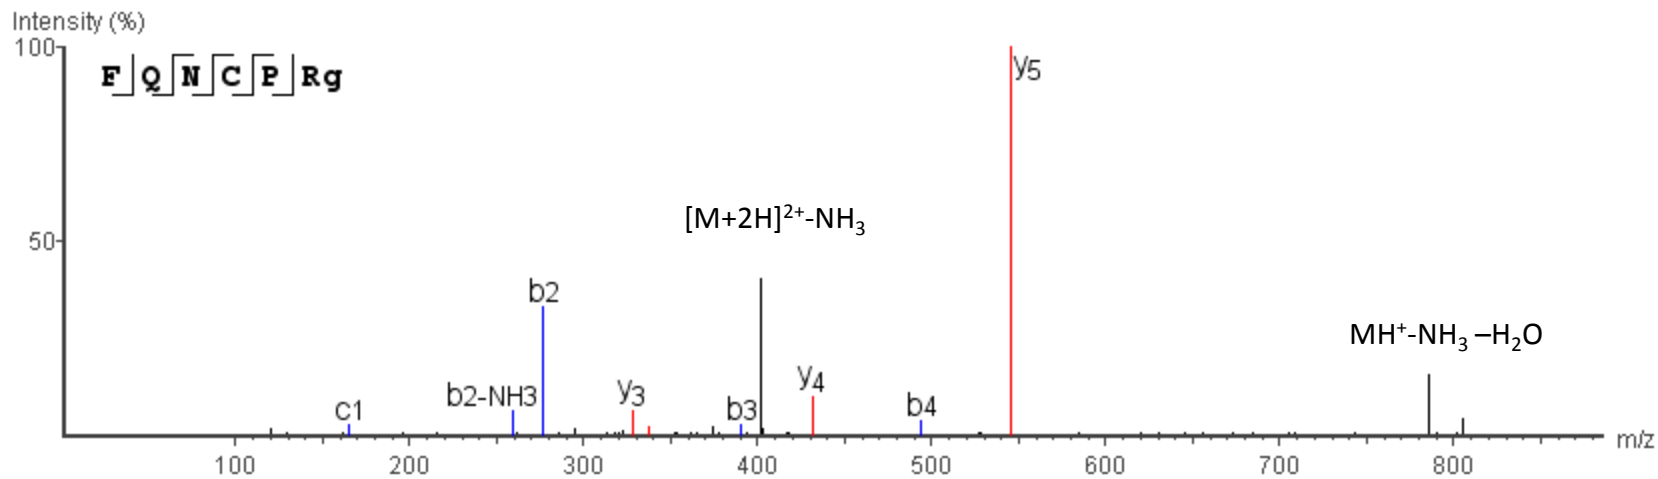

| # | Immonium | b        | b-H2O    | b-NH3    | a        | a-H2O    | a-NH3    | c        | c-H2O    | c-NH3    | c-H      | b (2+)   | a (2+)   | c (2+)   | Seq     | x        | x-H2O    | x-NH3    | y        | y-H2O    | y-NH3    | x (2+)   | y (2+)   | # |   |
|---|----------|----------|----------|----------|----------|----------|----------|----------|----------|----------|----------|----------|----------|----------|---------|----------|----------|----------|----------|----------|----------|----------|----------|---|---|
| 1 | 120.0812 | 148.0762 | 130.0657 | 131.0492 | 120.0812 | 102.0707 | 103.0542 | 165.1019 | 147.0927 | 148.0762 | 164.0954 | 74.5381  | 60.5406  | 83.0516  | F       |          |          |          |          |          |          |          |          |   | 7 |
| 2 | 101.0714 | 276.1343 | 258.1242 | 259.1075 | 248.1398 | 230.1292 | 231.1128 | 293.1618 | 275.1512 | 276.1343 | 292.1540 | 138.5674 | 124.5699 | 147.0809 | Q       | 699.3032 | 681.2927 | 682.2762 | 673.3239 | 655.3133 | 656.2969 | 350.1516 | 337.1619 | 6 |   |
| 3 | 87.0558  | 390.1763 | 372.1672 | 373.1508 | 362.1827 | 344.1722 | 345.1558 | 407.2047 | 389.1942 | 390.1763 | 406.1969 | 195.5889 | 181.5914 | 204.1024 | N       | 571.2446 | 553.2341 | 554.2177 | 545.2601 | 527.2547 | 528.2383 | 286.1223 | 273.1326 | 5 |   |
| 4 | 76.0220  | 493.1846 | 475.1764 | 476.1599 | 465.1919 | 447.1814 | 448.1649 | 510.2139 | 492.2034 | 493.1846 | 509.2061 | 247.0935 | 233.0960 | 255.6070 | C       | 457.2017 | 439.1912 | 440.1747 | 431.2173 | 413.2118 | 414.1954 | 229.1009 | 216.1112 | 4 |   |
| 5 | 70.0656  | 590.2397 | 572.2291 | 573.2127 | 562.2447 | 544.2341 | 545.2601 | 607.2667 | 589.2562 | 590.2397 | 606.2589 | 295.6198 | 281.6223 | 304.1334 | P       | 354.1925 | 336.1819 | 337.1631 | 328.2087 | 310.2026 | 311.1862 | 177.5963 | 164.6066 | 3 |   |
| 6 | 129.1139 | 746.3408 | 728.3302 | 729.3138 | 718.3458 | 700.3352 | 701.3188 | 763.3678 | 745.3572 | 746.3408 | 762.3599 | 373.6704 | 359.6729 | 382.1839 | R       | 257.1397 | 239.1292 | 240.1127 | 231.1604 | 213.1498 | 214.1334 | 129.0699 | 116.0802 | 2 |   |
| 7 | 29.0543  |          |          |          |          |          |          |          |          |          |          |          |          |          | G(-.98) | 101.0387 | 83.0281  | 84.0116  | 75.0593  | 57.0487  | 58.0323  | 51.0193  | 38.0296  | 1 |   |

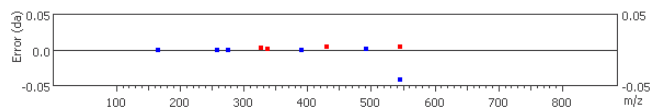



C.YFQNCPRG(-.98).G

m/z=492.2295

Error=0.1ppm

Z=2

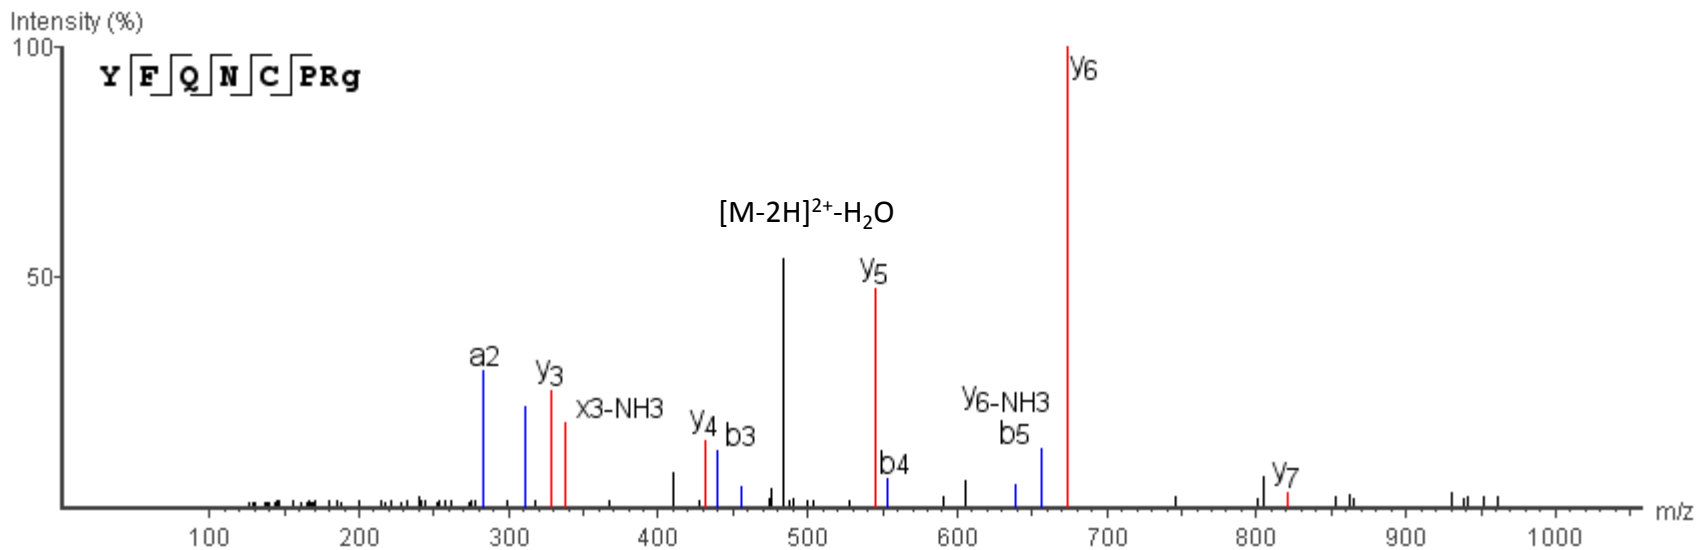

| # | Immonium | b               | b-H2O    | b-NH3           | a               | a-H2O    | a-NH3    | c               | c-H2O    | c-NH3           | c-H             | b (2+)   | a (2+)   | c (2+)   | Seq     | x        | x-H2O           | x-NH3           | y               | y-H2O    | y-NH3           | x (2+)   | y (2+)   | # |   |
|---|----------|-----------------|----------|-----------------|-----------------|----------|----------|-----------------|----------|-----------------|-----------------|----------|----------|----------|---------|----------|-----------------|-----------------|-----------------|----------|-----------------|----------|----------|---|---|
| 1 | 136.0761 | 164.0712        | 146.0606 | 147.0441        | 136.0761        | 118.0656 | 119.0491 | 181.0981        | 163.0876 | 164.0712        | 180.0903        | 82.5356  | 68.5381  | 91.0491  | Y       |          |                 |                 |                 |          |                 |          |          |   | 8 |
| 2 | 120.0812 | <u>311.1393</u> | 293.1290 | 294.1125        | <u>283.1443</u> | 265.1340 | 266.1176 | <u>328.2094</u> | 310.1560 | <u>311.1393</u> | 327.1587        | 156.0698 | 142.0723 | 164.5833 | F       | 846.3716 | 828.3611        | 829.3446        | <u>820.3871</u> | 802.3817 | 803.3653        | 423.6858 | 410.6961 | 7 |   |
| 3 | 101.0714 | <u>439.1972</u> | 421.1876 | 422.1711        | 411.2031        | 393.1926 | 394.1761 | 456.2251        | 438.2146 | <u>439.1972</u> | <u>455.2042</u> | 220.0991 | 206.1016 | 228.6126 | Q       | 699.3032 | 681.2927        | 682.2762        | <u>673.3196</u> | 655.3133 | <u>656.2493</u> | 350.1516 | 337.1619 | 6 |   |
| 4 | 87.0558  | <u>553.2412</u> | 535.2305 | 536.2141        | 525.2460        | 507.2355 | 508.2191 | 570.2681        | 552.2575 | <u>553.2412</u> | 569.2602        | 277.1205 | 263.1230 | 285.6340 | N       | 571.2446 | <u>553.2412</u> | 554.2177        | <u>545.2611</u> | 527.2547 | 528.2383        | 286.1223 | 273.1326 | 5 |   |
| 5 | 76.0220  | <u>656.2493</u> | 638.2397 | <u>639.2236</u> | 628.2552        | 610.2447 | 611.2283 | <u>673.3196</u> | 655.2667 | <u>656.2493</u> | 672.2694        | 328.6251 | 314.6276 | 337.1386 | C       | 457.2017 | <u>439.1972</u> | 440.1747        | <u>431.2186</u> | 413.2118 | 414.1954        | 229.1009 | 216.1112 | 4 |   |
| 6 | 70.0656  | 753.3030        | 735.2924 | 736.2760        | 725.3080        | 707.2974 | 708.2810 | 770.3300        | 752.3195 | 753.3030        | 769.3221        | 377.1515 | 363.1540 | 385.6650 | P       | 354.1925 | 336.1819        | <u>337.1640</u> | <u>328.2094</u> | 310.2026 | <u>311.1393</u> | 177.5963 | 164.6066 | 3 |   |
| 7 | 129.1139 | 909.4041        | 891.3936 | 892.3771        | 881.4091        | 863.3986 | 864.3821 | 926.4312        | 908.4206 | 909.4041        | 925.4233        | 455.2021 | 441.2046 | 463.7156 | R       | 257.1397 | 239.1292        | 240.1127        | 231.1604        | 213.1498 | 214.1334        | 129.0699 | 116.0802 | 2 |   |
| 8 | 29.0543  |                 |          |                 |                 |          |          |                 |          |                 |                 |          |          |          | G(-.98) | 101.0387 | 83.0281         | 84.0116         | 75.0593         | 57.0487  | 58.0323         | 51.0193  | 38.0296  | 1 |   |

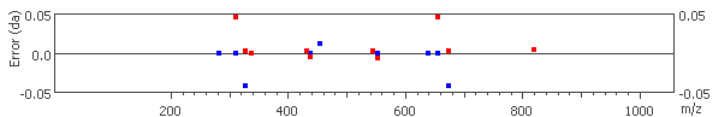

R.SANSNPAM(+15.99)APRE.R

Z=2

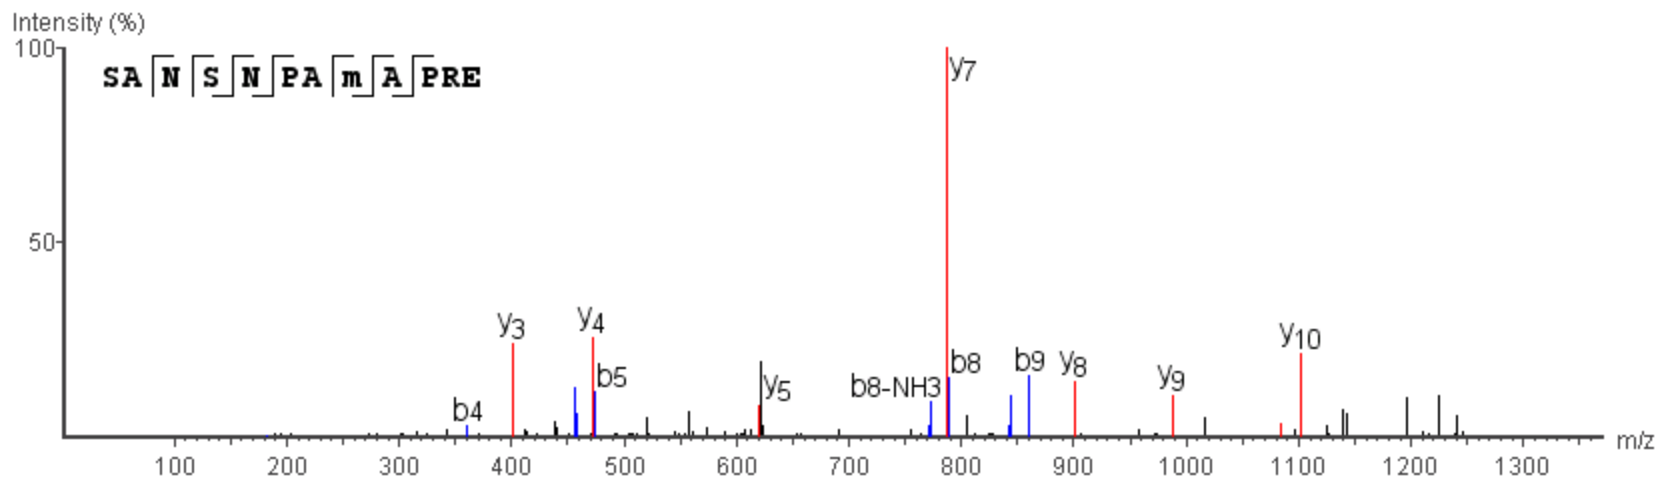

| #  | Immonium | b         | b-H2O     | b-NH3     | a         | a-H2O     | a-NH3     | c         | c-H2O     | c-NH3     | c-H       | b (2+)   | a (2+)   | c (2+)   | Seq       | x         | x-H2O     | x-NH3     | y         | y-H2O     | y-NH3     | x (2+)   | y (2+)   | #  |  |    |
|----|----------|-----------|-----------|-----------|-----------|-----------|-----------|-----------|-----------|-----------|-----------|----------|----------|----------|-----------|-----------|-----------|-----------|-----------|-----------|-----------|----------|----------|----|--|----|
| 1  | 60.0449  | 88.0399   | 70.0293   | 71.0129   | 60.0449   | 42.0343   | 43.0179   | 105.0669  | 87.0563   | 88.0399   | 104.0590  | 44.5199  | 30.5224  | 53.0334  | S         |           |           |           |           |           |           |          |          |    |  | 12 |
| 2  | 44.0499  | 159.0770  | 141.0664  | 142.0500  | 131.0820  | 113.0714  | 114.0550  | 176.1040  | 158.0934  | 159.0770  | 175.0961  | 80.0385  | 66.0410  | 88.5520  | A         | 1199.5061 | 1181.4955 | 1182.4791 | 1173.5267 | 1155.5162 | 1156.4998 | 600.2531 | 587.2634 | 11 |  |    |
| 3  | 87.0558  | 273.1199  | 255.1093  | 256.0929  | 245.1249  | 227.1143  | 228.0979  | 290.1469  | 272.1363  | 273.1199  | 289.1391  | 137.0599 | 123.0624 | 145.5734 | N         | 1128.4690 | 1110.4584 | 1111.4420 | 1102.4929 | 1084.4801 | 1085.4626 | 564.7345 | 551.7448 | 10 |  |    |
| 4  | 60.0449  | 360.1515  | 342.1414  | 343.1249  | 332.1569  | 314.1464  | 315.1299  | 377.1789  | 359.1684  | 360.1515  | 376.1711  | 180.5760 | 166.5785 | 189.0895 | S         | 1014.4261 | 996.4155  | 997.3990  | 988.4513  | 970.4362  | 971.4197  | 507.7130 | 494.7234 | 9  |  |    |
| 5  | 87.0558  | 474.1936  | 456.1833  | 457.1675  | 446.1998  | 428.1893  | 429.1729  | 491.2218  | 473.2113  | 474.1936  | 490.2140  | 237.5974 | 223.5999 | 246.1109 | N         | 927.3940  | 909.3835  | 910.3671  | 901.4189  | 883.4041  | 884.3877  | 464.1970 | 451.2073 | 8  |  |    |
| 6  | 70.0656  | 571.2476  | 553.2371  | 554.2206  | 543.2526  | 525.2421  | 526.2256  | 588.2747  | 570.2641  | 571.2476  | 587.2668  | 286.1238 | 272.1263 | 294.6373 | P         | 813.3511  | 795.3406  | 796.3241  | 787.3758  | 769.3612  | 770.3448  | 407.1756 | 394.1859 | 7  |  |    |
| 7  | 44.0499  | 642.2847  | 624.2742  | 625.2578  | 614.2897  | 596.2792  | 597.2628  | 659.3118  | 641.3012  | 642.2847  | 658.3039  | 321.6424 | 307.6449 | 330.1559 | A         | 716.2983  | 698.2878  | 699.2714  | 690.3190  | 672.3084  | 673.2920  | 358.6492 | 345.6595 | 6  |  |    |
| 8  | 120.0433 | 789.3196  | 771.3096  | 772.2910  | 761.3202  | 743.3096  | 744.2932  | 806.3422  | 788.3317  | 789.3196  | 805.3344  | 395.1576 | 381.1601 | 403.6711 | M(+15.99) | 645.2612  | 627.2507  | 628.2343  | 619.2867  | 601.2713  | 602.2549  | 323.1306 | 310.1409 | 5  |  |    |
| 9  | 44.0499  | 860.3558  | 842.3458  | 843.3288  | 832.3573  | 814.3467  | 815.3303  | 877.3793  | 859.3688  | 860.3558  | 876.3715  | 430.6761 | 416.6786 | 439.1897 | A         | 498.2307  | 480.2202  | 481.2037  | 472.2512  | 454.2408  | 455.2244  | 249.6154 | 236.6257 | 4  |  |    |
| 10 | 70.0656  | 957.4051  | 939.3945  | 940.3781  | 929.4101  | 911.3995  | 912.3831  | 974.4321  | 956.4216  | 957.4051  | 973.4243  | 479.2025 | 465.2050 | 487.7161 | P         | 427.1936  | 409.1831  | 410.1666  | 401.2145  | 383.2037  | 384.1873  | 214.0968 | 201.1071 | 3  |  |    |
| 11 | 129.1139 | 1113.5062 | 1095.4957 | 1096.4792 | 1085.5112 | 1067.5007 | 1068.4843 | 1130.5332 | 1112.5227 | 1113.5062 | 1129.5254 | 557.2531 | 543.2556 | 565.7666 | R         | 330.1409  | 312.1303  | 313.1139  | 304.1615  | 286.1509  | 287.1345  | 165.5704 | 152.5807 | 2  |  |    |
| 12 | 102.0554 |           |           |           |           |           |           |           |           |           |           |          |          |          | E         | 174.0398  | 156.0292  | 157.0128  | 148.0604  | 130.0499  | 131.0334  | 87.5199  | 74.5302  | 1  |  |    |

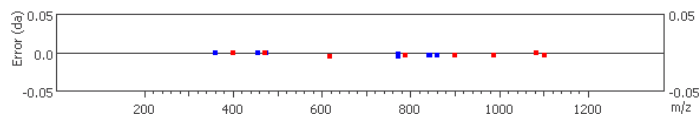

Supplement: supp_M112.024828_mcp.M112.024828-4.pdf [file supp_M112.024828_mcp.M112.024828-4.pdf]
