# Supplementary material
Source: PubMed Central journal article supplement (PMC3675813)

(3) Sequence assignments of peptides solely identified from their precursors

R.SGSAKVAFSATRSTNH.E

m/z=540.9408

Error=-0.6ppm

Z=3

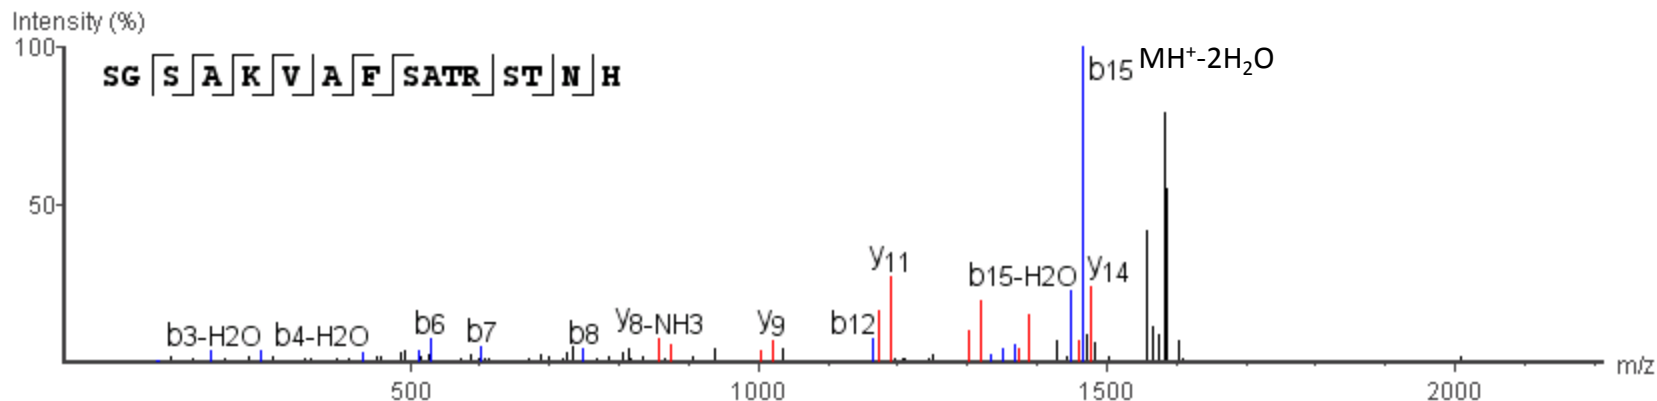

| #  | Immonium | b         | b-H2O     | b-NH3     | a         | a-H2O     | a-NH3     | c         | c-H2O     | c-NH3     | c-H       | b(2+)    | a(2+)    | c(2+)    | Seq | x         | x-H2O     | x-NH3     | y         | y-H2O     | y-NH3     | x(2+)    | y(2+)    | #  |
|----|----------|-----------|-----------|-----------|-----------|-----------|-----------|-----------|-----------|-----------|-----------|----------|----------|----------|-----|-----------|-----------|-----------|-----------|-----------|-----------|----------|----------|----|
| 1  | 60.0449  | 88.0399   | 70.0293   | 71.0129   | 60.0449   | 42.0343   | 43.0179   | 105.0669  | 87.0563   | 88.0399   | 104.0590  | 44.5199  | 30.5224  | 53.0334  | S   |           |           |           |           |           |           |          |          | 16 |
| 2  | 30.0343  | 145.0613  | 127.0508  | 128.0343  | 117.0663  | 99.0558   | 100.0393  | 162.0883  | 144.0778  | 145.0613  | 161.0805  | 73.0307  | 59.0332  | 81.5442  | G   | 1559.7561 | 1541.7455 | 1542.7291 | 1533.7767 | 1515.7662 | 1516.7498 | 780.3781 | 767.3884 | 15 |
| 3  | 60.0449  | 232.0933  | 214.0822  | 215.0663  | 204.0983  | 186.0878  | 187.0713  | 249.1203  | 231.1098  | 232.0933  | 248.1125  | 116.5467 | 102.5492 | 125.0602 | S   | 1502.7347 | 1484.7241 | 1485.7078 | 1476.7574 | 1458.7449 | 1459.7255 | 751.8674 | 738.8777 | 14 |
| 4  | 44.0499  | 303.1304  | 285.1201  | 286.1035  | 275.1354  | 257.1249  | 258.1085  | 320.1574  | 302.1469  | 303.1304  | 319.1496  | 152.0652 | 138.0677 | 160.5787 | A   | 1415.7026 | 1397.6920 | 1398.6757 | 1389.7229 | 1371.7128 | 1372.6930 | 708.3513 | 695.3616 | 13 |
| 5  | 101.1078 | 431.2251  | 413.2148  | 414.1984  | 403.2304  | 385.2198  | 386.2034  | 448.2524  | 430.2419  | 431.2251  | 447.2446  | 216.1127 | 202.1152 | 224.6262 | K   | 1344.6655 | 1326.6549 | 1327.6385 | 1318.6853 | 1300.6757 | 1301.6572 | 672.8328 | 659.8431 | 12 |
| 6  | 72.0812  | 530.2933  | 512.2812  | 513.2668  | 502.2988  | 484.2883  | 485.2719  | 547.3209  | 529.3103  | 530.2933  | 546.3130  | 265.6469 | 251.6494 | 274.1604 | V   | 1216.5706 | 1198.5599 | 1199.5436 | 1190.5897 | 1172.5807 | 1173.5697 | 608.7853 | 595.7956 | 11 |
| 7  | 44.0499  | 601.3301  | 583.3204  | 584.3040  | 573.3359  | 555.3254  | 556.3090  | 618.3580  | 600.3474  | 601.3301  | 617.3501  | 301.1655 | 287.1680 | 309.6790 | A   | 1117.5022 | 1099.4916 | 1100.4752 | 1091.5228 | 1073.5123 | 1074.4958 | 559.2511 | 546.2614 | 10 |
| 8  | 120.0812 | 748.3979  | 730.3887  | 731.3723  | 720.4043  | 702.3937  | 703.3773  | 765.4263  | 747.4158  | 748.3979  | 764.4185  | 374.6996 | 360.7021 | 383.2132 | F   | 1046.4651 | 1028.4545 | 1029.4381 | 1020.4847 | 1002.4752 | 1003.4597 | 523.7325 | 510.7429 | 9  |
| 9  | 60.0449  | 835.4313  | 817.4208  | 818.4044  | 807.4363  | 789.4258  | 790.4094  | 852.4584  | 834.4478  | 835.4313  | 851.4505  | 418.2157 | 404.2182 | 426.7292 | S   | 899.3967  | 881.3861  | 882.3696  | 873.4165  | 855.4067  | 856.3889  | 450.1983 | 437.2086 | 8  |
| 10 | 44.0499  | 906.4684  | 888.4579  | 889.4415  | 878.4734  | 860.4629  | 861.4465  | 923.4955  | 905.4849  | 906.4684  | 922.4876  | 453.7342 | 439.7367 | 462.2477 | A   | 812.3646  | 794.3541  | 795.3376  | 786.3853  | 768.3747  | 769.3583  | 406.6823 | 393.6926 | 7  |
| 11 | 74.0605  | 1007.5161 | 989.5056  | 990.4891  | 979.5211  | 961.5106  | 962.4941  | 1024.5431 | 1006.5326 | 1007.5161 | 1023.5353 | 504.2581 | 490.2606 | 512.7715 | T   | 741.3275  | 723.3170  | 724.3005  | 715.3481  | 697.3376  | 698.3212  | 371.1638 | 358.1741 | 6  |
| 12 | 129.1139 | 1163.6173 | 1145.6067 | 1146.5902 | 1135.6222 | 1117.6117 | 1118.5952 | 1180.6442 | 1162.6337 | 1163.6173 | 1179.6364 | 582.3086 | 568.3111 | 590.8221 | R   | 640.2798  | 622.2693  | 623.2528  | 614.3005  | 596.2899  | 597.2735  | 320.6399 | 307.6502 | 5  |
| 13 | 60.0449  | 1250.6493 | 1232.6388 | 1233.6223 | 1222.6543 | 1204.6438 | 1205.6273 | 1267.6763 | 1249.6658 | 1250.6493 | 1266.6685 | 625.8246 | 611.8271 | 634.3381 | S   | 484.1787  | 466.1682  | 467.1517  | 458.1994  | 440.1888  | 441.1724  | 242.5894 | 229.5997 | 4  |
| 14 | 74.0605  | 1351.6941 | 1333.6824 | 1334.6700 | 1323.7020 | 1305.6915 | 1306.6750 | 1368.7205 | 1350.7135 | 1351.6941 | 1367.7162 | 676.3485 | 662.3510 | 684.8620 | T   | 397.1467  | 379.1362  | 380.1197  | 371.1674  | 353.1568  | 354.1404  | 199.0734 | 186.0837 | 3  |
| 15 | 87.0558  | 1465.7369 | 1447.7273 | 1448.7129 | 1437.7449 | 1419.7344 | 1420.7179 | 1482.7668 | 1464.7563 | 1465.7369 | 1481.7590 | 733.3699 | 719.3724 | 741.8834 | N   | 296.0990  | 278.0885  | 279.0720  | 270.1197  | 252.1091  | 253.0927  | 148.5495 | 135.5598 | 2  |
| 16 | 110.0717 |           |           |           |           |           |           |           |           |           |           |          |          |          | H   | 182.0561  | 164.0455  | 165.0291  | 156.0768  | 138.0662  | 139.0497  | 91.5280  | 78.5384  | 1  |

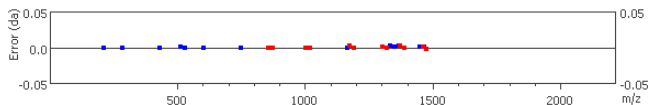

R.Q(-17.03)ERPPLQQPPHRD.K

m/z=527.6022

Error=-0.3ppm

Z=3

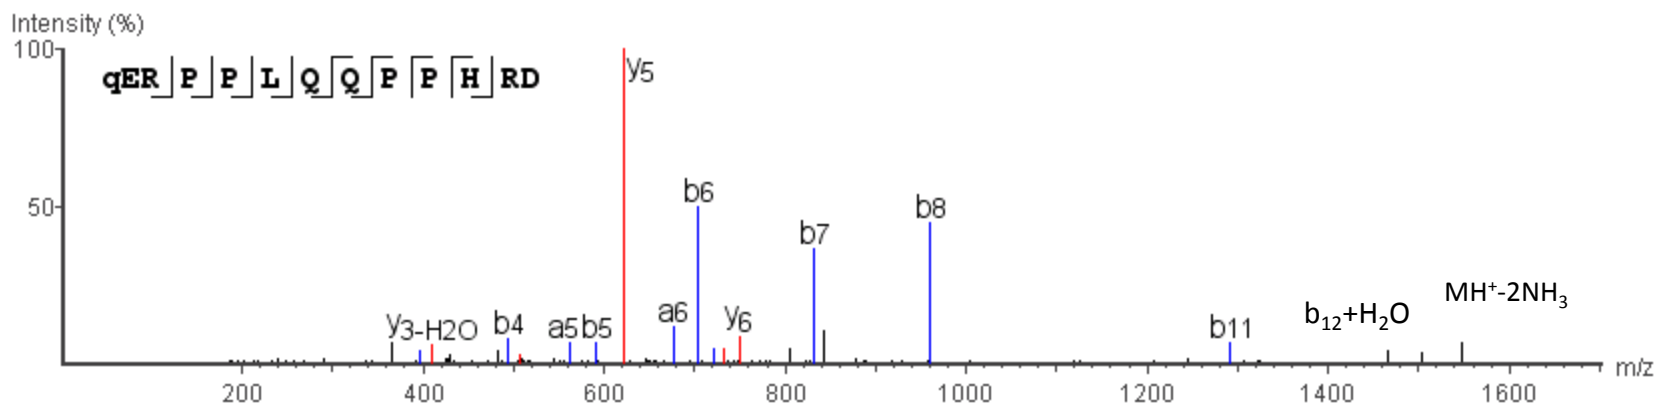

| #  | Immonium | b                         | b-H2O     | b-NH3     | a                        | a-H2O     | a-NH3     | c                        | c-H2O     | c-NH3                     | c-H       | b (2+)   | a (2+)   | c (2+)   | Seq       | x         | x-H2O     | x-NH3     | y                        | y-H2O                    | y-NH3                    | x (2+)   | y (2+)   | #  |    |
|----|----------|---------------------------|-----------|-----------|--------------------------|-----------|-----------|--------------------------|-----------|---------------------------|-----------|----------|----------|----------|-----------|-----------|-----------|-----------|--------------------------|--------------------------|--------------------------|----------|----------|----|----|
| 1  | 84.0414  | 112.0364                  | 94.0258   | 95.0094   | 84.0414                  | 66.0308   | 67.0144   | 129.0634                 | 111.0528  | 112.0364                  | 128.0556  | 56.5182  | 42.5207  | 65.0317  | Q(-17.03) |           |           |           |                          |                          |                          |          |          |    | 13 |
| 2  | 102.0554 | 241.0790                  | 223.0684  | 224.0520  | 213.0840                 | 195.0734  | 196.0570  | 258.1060                 | 240.0954  | 241.0790                  | 257.0982  | 121.0395 | 107.0420 | 129.5530 | E         | 1495.7401 | 1477.7295 | 1478.7131 | 1469.7607                | 1451.7502                | 1452.7338                | 748.3701 | 735.3804 | 12 |    |
| 3  | 129.1139 | <a href="#">397.1828</a>  | 379.1695  | 380.1531  | 369.1851                 | 351.1745  | 352.1581  | 414.2071                 | 396.1965  | <a href="#">397.1828</a>  | 413.1993  | 199.0900 | 185.0925 | 207.6035 | R         | 1366.6975 | 1348.6869 | 1349.6705 | 1340.7181                | 1322.7076                | 1323.6912                | 683.8488 | 670.8591 | 11 |    |
| 4  | 70.0656  | <a href="#">494.2347</a>  | 476.2223  | 477.2059  | 466.2379                 | 448.2273  | 449.2109  | 511.2599                 | 493.2493  | <a href="#">494.2347</a>  | 510.2520  | 247.6164 | 233.6189 | 256.1299 | P         | 1210.5964 | 1192.5858 | 1193.5695 | 1184.6171                | 1166.6066                | 1167.5901                | 605.7982 | 592.8085 | 10 |    |
| 5  | 70.0656  | <a href="#">591.2878</a>  | 573.2750  | 574.2586  | <a href="#">563.2946</a> | 545.2800  | 546.2636  | 608.3126                 | 590.3021  | <a href="#">591.2878</a>  | 607.3047  | 296.1428 | 282.1453 | 304.6563 | P         | 1113.5436 | 1095.5330 | 1096.5166 | 1087.5642                | 1069.5537                | 1070.5372                | 557.2718 | 544.2821 | 9  |    |
| 6  | 86.0969  | <a href="#">704.3711</a>  | 686.3591  | 687.3427  | <a href="#">676.3767</a> | 658.3641  | 659.3477  | <a href="#">721.3976</a> | 703.3861  | <a href="#">704.3711</a>  | 720.3888  | 352.6848 | 338.6873 | 361.1983 | L         | 1016.4909 | 998.4803  | 999.4639  | 990.5115                 | 972.5010                 | 973.4846                 | 508.7455 | 495.7558 | 8  |    |
| 7  | 101.0714 | <a href="#">832.4302</a>  | 814.4177  | 815.4012  | 804.4332                 | 786.4227  | 787.4062  | 849.4553                 | 831.4447  | <a href="#">832.4302</a>  | 848.4474  | 416.7141 | 402.7166 | 425.2276 | Q         | 903.4068  | 885.3962  | 886.3798  | 877.4274                 | 859.4169                 | 860.4005                 | 452.2034 | 439.2137 | 7  |    |
| 8  | 101.0714 | <a href="#">960.4878</a>  | 942.4763  | 943.4598  | 932.4918                 | 914.4813  | 915.4648  | 977.5139                 | 959.5033  | <a href="#">960.4878</a>  | 976.5060  | 480.7434 | 466.7459 | 489.2569 | Q         | 775.3483  | 757.3377  | 758.3213  | <a href="#">749.3682</a> | 731.3583                 | <a href="#">732.3407</a> | 388.1741 | 375.1844 | 6  |    |
| 9  | 70.0656  | 1057.5396                 | 1039.5291 | 1040.5126 | 1029.5446                | 1011.5340 | 1012.5176 | 1074.5665                | 1056.5560 | 1057.5396                 | 1073.5587 | 529.2698 | 515.2723 | 537.7833 | P         | 647.2897  | 629.2791  | 630.2627  | <a href="#">621.3092</a> | 603.2997                 | 604.2833                 | 324.1448 | 311.1552 | 5  |    |
| 10 | 70.0656  | 1154.5923                 | 1136.5818 | 1137.5653 | 1126.5973                | 1108.5868 | 1109.5703 | 1171.6193                | 1153.6088 | 1154.5923                 | 1170.6115 | 577.7961 | 563.7986 | 586.3096 | P         | 550.2369  | 532.2263  | 533.2099  | 524.2576                 | <a href="#">506.2825</a> | 507.2306                 | 275.6184 | 262.6288 | 4  |    |
| 11 | 110.0717 | <a href="#">1291.6530</a> | 1273.6407 | 1274.6243 | 1263.6562                | 1245.6458 | 1246.6293 | 1308.6782                | 1290.6677 | <a href="#">1291.6530</a> | 1307.6704 | 646.3256 | 632.3281 | 654.8391 | H         | 453.1841  | 435.1736  | 436.1571  | 427.2048                 | <a href="#">409.2301</a> | 410.1778                 | 227.0921 | 214.1024 | 3  |    |
| 12 | 129.1139 | 1447.7523                 | 1429.7418 | 1430.7253 | 1419.7573                | 1401.7468 | 1402.7303 | 1464.7793                | 1446.7688 | 1447.7523                 | 1463.7715 | 724.3762 | 710.3787 | 732.8896 | R         | 316.1252  | 298.1147  | 299.0982  | 290.1459                 | 272.1353                 | 273.1189                 | 158.5626 | 145.5729 | 2  |    |
| 13 | 88.0398  |                           |           |           |                          |           |           |                          |           |                           |           |          |          |          | D         | 160.0241  | 142.0136  | 142.9971  | 134.0448                 | 116.0342                 | 117.0178                 | 80.5121  | 67.5224  | 1  |    |

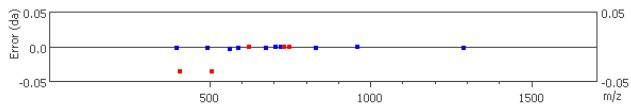

R.GIPKGVKE.R

m/z=414.2538

Error=2.4ppm

Z=2

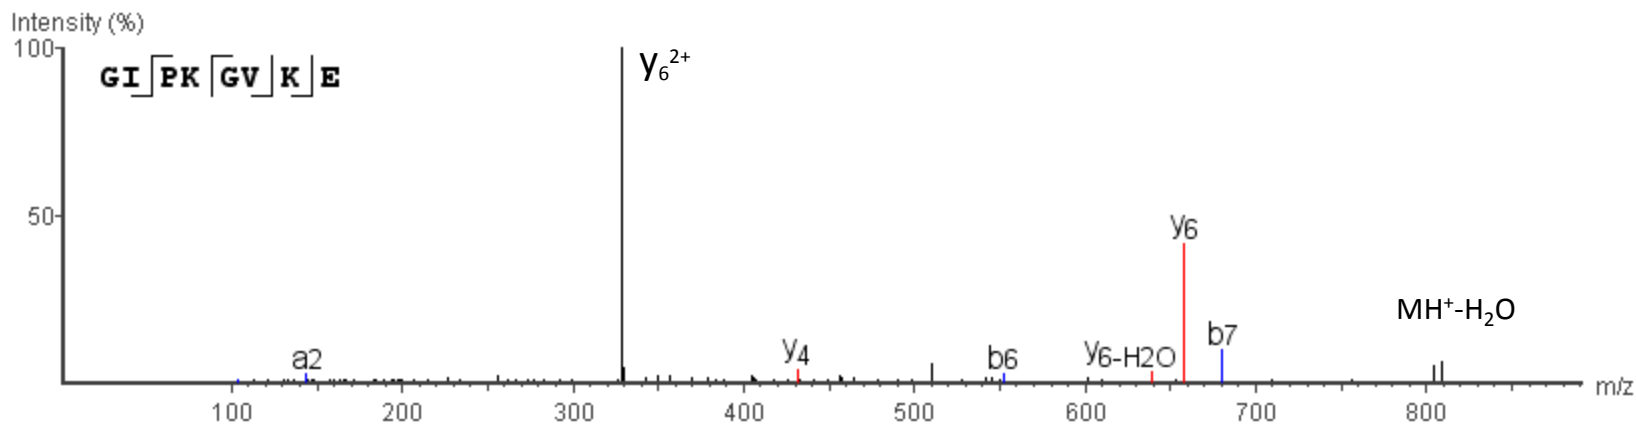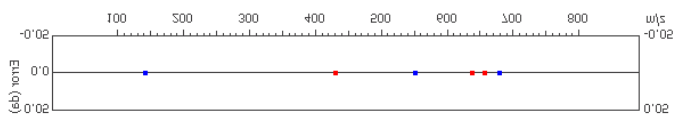

|   |          |          |          |          |          |          |          |          |          |          |          |          |          |          |     |          |          |          |          |          |          |          |          |   |
|---|----------|----------|----------|----------|----------|----------|----------|----------|----------|----------|----------|----------|----------|----------|-----|----------|----------|----------|----------|----------|----------|----------|----------|---|
| 8 | 105'0224 |          |          |          |          |          |          |          |          |          |          |          |          |          | E   | 134'0388 | 126'0585 | 123'0158 | 148'0804 | 130'0488 | 131'0334 | 83'2188  | 34'2305  | 1 |
| Δ | 101'1038 | 880'4442 | 885'4383 | 883'4188 | 825'4208 | 834'4403 | 832'4538 | 881'4158 | 838'4653 | 880'4442 | 898'4820 | 340'3558 | 358'3524 | 348'3382 | K   | 305'1343 | 384'1545 | 382'1033 | 338'1824 | 328'1448 | 328'1584 | 121'2634 | 138'2333 | 5 |
| ρ | Δ5'0815  | 225'3488 | 234'3404 | 232'3540 | 254'3280 | 208'3424 | 203'3580 | 288'3380 | 221'3634 | 225'3488 | 288'3301 | 338'4322 | 385'4380 | 382'1880 | A   | 401'5035 | 383'1858 | 384'1381 | 332'5538 | 323'5135 | 328'1888 | 501'1018 | 188'1118 | 3 |
| 2 | 30'0343  | 423'5852 | 432'5318 | 438'5222 | 452'5832 | 403'5388 | 408'5802 | 430'3082 | 425'5880 | 423'5852 | 488'3013 | 553'1413 | 513'1438 | 532'8248 | c   | 428'5548 | 440'5141 | 441'1838 | 435'5448 | 414'5343 | 412'5183 | 558'8153 | 518'8558 | 4 |
| 4 | 101'1038 | 388'5810 | 338'5202 | 338'5341 | 388'5881 | 320'5222 | 321'5381 | 413'5881 | 382'5332 | 388'5810 | 415'5805 | 188'8302 | 184'8330 | 503'1440 | K   | 288'3188 | 288'3080 | 288'5858 | 280'3405 | 245'3583 | 243'3135 | 583'8288 | 580'8301 | 2 |
| 3 | Δ0'0828  | 588'1881 | 520'1222 | 521'1381 | 540'1311 | 555'1802 | 553'1441 | 582'1831 | 583'1852 | 588'1881 | 584'1823 | 134'2830 | 150'2822 | 143'0822 | b   | 883'3353 | 882'3818 | 888'3423 | 823'3852 | 838'3855 | 840'3880 | 345'1885 | 358'1882 | 8 |
| 5 | 88'0888  | 131'1134 | 123'1058 | 124'0883 | 143'1138 | 152'1038 | 158'0814 | 188'1404 | 130'1588 | 131'1134 | 183'1352 | 88'0883  | Δ5'0885  | 84'2305  | I   | 388'4284 | 338'4428 | 338'4583 | 330'4330 | Δ25'4884 | Δ23'4200 | 388'3585 | 382'3382 | Δ |
| 1 | 30'0343  | 28'0583  | 40'0183  | 41'0053  | 30'0343  | 15'0533  | 13'0033  | Δ2'0283  | 23'0423  | 28'0583  | Δ4'0882  | 58'2148  | 12'2131  | 38'0581  | e   |          |          |          |          |          |          |          |          | 8 |
| # | μμμμμμμμ | p        | p-HSO    | p-VH3    | g        | g-HSO    | g-VH3    | c        | c-HSO    | c-VH3    | c-H      | p(S+)    | g(S+)    | c(S+)    | 2ed | x        | x-HSO    | x-VH3    | λ        | λ-HSO    | λ-VH3    | x(S+)    | λ(S+)    | # |

G.LGMPTKE

m/z=388.2044

Error=-0.4ppm

Z=2

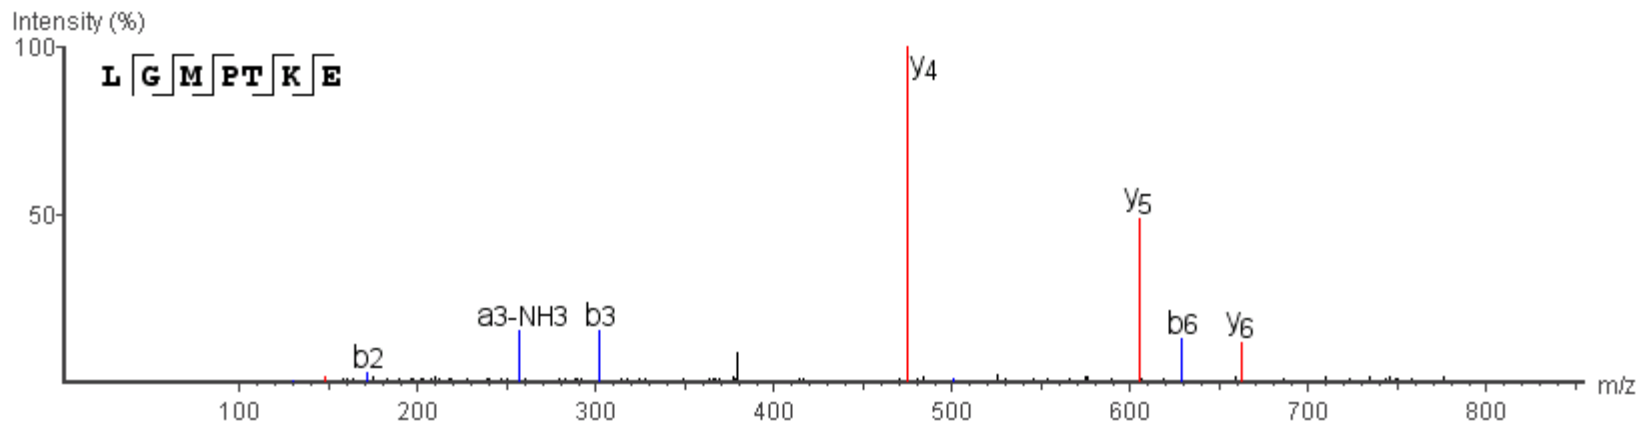

| # | Immonium | b        | b-H2O    | b-NH3    | a        | a-H2O    | a-NH3    | c        | c-H2O    | c-NH3    | c-H      | b (2+)   | a (2+)   | c (2+)   | Seq | x        | x-H2O    | x-NH3    | y        | y-H2O    | y-NH3    | x (2+)   | y (2+)   | # |   |
|---|----------|----------|----------|----------|----------|----------|----------|----------|----------|----------|----------|----------|----------|----------|-----|----------|----------|----------|----------|----------|----------|----------|----------|---|---|
| 1 | 86.0969  | 114.0919 | 96.0813  | 97.0649  | 86.0969  | 68.0863  | 69.0699  | 131.1189 | 113.1083 | 114.0919 | 130.1111 | 57.5459  | 43.5484  | 66.0594  | L   |          |          |          |          |          |          |          |          |   | 7 |
| 2 | 30.0343  | 171.1127 | 153.1028 | 154.0863 | 143.1183 | 125.1078 | 126.0914 | 188.1404 | 170.1298 | 171.1127 | 187.1325 | 86.0567  | 72.0592  | 94.5702  | G   | 688.2971 | 670.2866 | 671.2701 | 662.3174 | 644.3072 | 645.2908 | 344.6486 | 331.6589 | 6 |   |
| 3 | 104.0533 | 302.1534 | 284.1433 | 285.1269 | 274.1588 | 256.1483 | 257.1319 | 319.1808 | 301.1703 | 302.1534 | 318.1730 | 151.5769 | 137.5794 | 160.0904 | M   | 631.2757 | 613.2651 | 614.2487 | 605.2963 | 587.2858 | 588.2693 | 316.1378 | 303.1482 | 5 |   |
| 4 | 70.0656  | 399.2066 | 381.1960 | 382.1796 | 371.2116 | 353.2010 | 354.1846 | 416.2336 | 398.2231 | 399.2066 | 415.2258 | 200.1033 | 186.1058 | 208.6168 | P   | 500.2352 | 482.2246 | 483.2082 | 474.2553 | 456.2452 | 457.2288 | 250.6176 | 237.6279 | 4 |   |
| 5 | 74.0605  | 500.2543 | 482.2437 | 483.2273 | 472.2593 | 454.2487 | 455.2323 | 517.2813 | 499.2707 | 500.2543 | 516.2734 | 250.6271 | 236.6296 | 259.1407 | T   | 403.1824 | 385.1719 | 386.1554 | 377.2031 | 359.1925 | 360.1761 | 202.0912 | 189.1015 | 3 |   |
| 6 | 101.1078 | 628.3492 | 610.3387 | 611.3223 | 600.3542 | 582.3437 | 583.3273 | 645.3763 | 627.3657 | 628.3492 | 644.3684 | 314.6746 | 300.6771 | 323.1881 | K   | 302.1534 | 284.1242 | 285.1077 | 276.1554 | 258.1448 | 259.1284 | 151.5674 | 138.5777 | 2 |   |
| 7 | 102.0554 |          |          |          |          |          |          |          |          |          |          |          |          |          | E   | 174.0398 | 156.0292 | 157.0128 | 148.0604 | 130.0499 | 131.0334 | 87.5199  | 74.5302  | 1 |   |

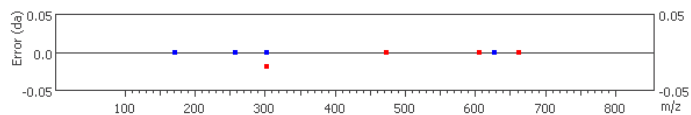

A.APVSTGAGGGTVLAKMYPR.G

m/z=611.6641

Error=4.9ppm

Z=3

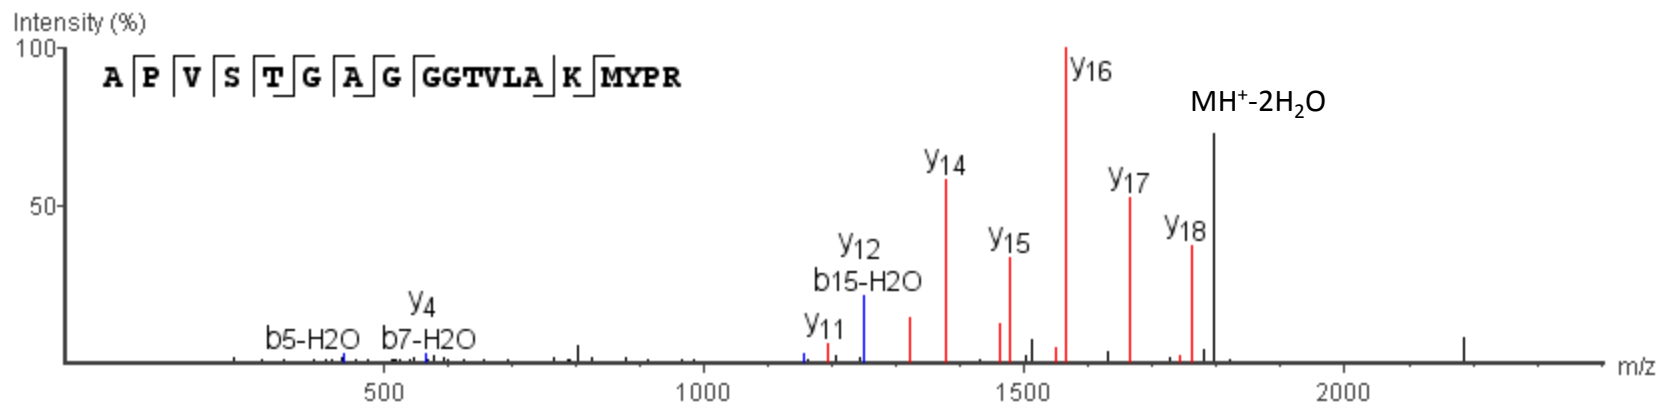

| #  | Immonium | b         | b-H2O     | b-NH3     | a         | a-H2O     | a-NH3     | c         | c-H2O     | c-NH3     | c-H       | b(2+)    | a(2+)    | c(2+)    | Seq | x         | x-H2O     | x-NH3     | y         | y-H2O     | y-NH3     | x(2+)    | y(2+)    | #  |    |
|----|----------|-----------|-----------|-----------|-----------|-----------|-----------|-----------|-----------|-----------|-----------|----------|----------|----------|-----|-----------|-----------|-----------|-----------|-----------|-----------|----------|----------|----|----|
| 1  | 44.0499  | 72.0449   | 54.0344   | 55.0179   | 44.0499   | 26.0394   | 27.0229   | 89.0719   | 71.0614   | 72.0449   | 88.0641   | 36.5225  | 22.5250  | 45.0360  | A   |           |           |           |           |           |           |          |          |    | 19 |
| 2  | 70.0656  | 169.0977  | 151.0871  | 152.0707  | 141.1027  | 123.0921  | 124.0757  | 186.1247  | 168.1141  | 169.0977  | 185.1169  | 85.0489  | 71.0513  | 93.5623  | P   | 1787.9109 | 1769.9003 | 1770.8839 | 1761.9351 | 1743.9282 | 1744.9045 | 894.4554 | 881.4658 | 18 |    |
| 3  | 72.0812  | 268.1661  | 250.1555  | 251.1391  | 240.1711  | 222.1605  | 223.1441  | 285.1931  | 267.1825  | 268.1661  | 284.1853  | 134.5830 | 120.5855 | 143.0965 | V   | 1690.8582 | 1672.8475 | 1673.8312 | 1664.8813 | 1646.8683 | 1647.8518 | 845.9291 | 832.9394 | 17 |    |
| 4  | 60.0449  | 355.1981  | 337.1876  | 338.1711  | 327.2031  | 309.1926  | 310.1761  | 372.2251  | 354.2146  | 355.1981  | 371.2173  | 178.0991 | 164.1016 | 186.6126 | S   | 1591.7898 | 1573.7792 | 1574.7628 | 1565.8130 | 1547.8062 | 1548.7834 | 796.3949 | 783.4052 | 16 |    |
| 5  | 74.0605  | 456.2458  | 438.2349  | 439.2188  | 428.2508  | 410.2402  | 411.2238  | 473.2728  | 455.2622  | 456.2458  | 472.2650  | 228.6229 | 214.6254 | 237.1364 | T   | 1504.7577 | 1486.7471 | 1487.7307 | 1478.7804 | 1460.7694 | 1461.7513 | 752.8788 | 739.8892 | 15 |    |
| 6  | 30.0343  | 513.2673  | 495.2567  | 496.2403  | 485.2723  | 467.2617  | 468.2453  | 530.2943  | 512.2838  | 513.2673  | 529.2864  | 257.1336 | 243.1361 | 265.6472 | G   | 1403.7101 | 1385.6995 | 1386.6831 | 1377.7330 | 1359.7202 | 1360.7037 | 702.3550 | 689.3654 | 14 |    |
| 7  | 44.0499  | 584.3044  | 566.2789  | 567.2774  | 556.3094  | 538.2988  | 539.2824  | 601.3314  | 583.3209  | 584.3044  | 600.3235  | 292.6522 | 278.6547 | 301.1657 | A   | 1346.6886 | 1328.6780 | 1329.6616 | 1320.7119 | 1302.6987 | 1303.6823 | 673.8443 | 660.8546 | 13 |    |
| 8  | 30.0343  | 641.3258  | 623.3152  | 624.2988  | 613.3308  | 595.3203  | 596.3038  | 658.3528  | 640.3423  | 641.3258  | 657.3450  | 321.1629 | 307.1654 | 329.6764 | G   | 1275.6515 | 1257.6409 | 1258.6245 | 1249.6742 | 1231.6616 | 1232.6451 | 638.3257 | 625.3361 | 12 |    |
| 9  | 30.0343  | 698.3473  | 680.3367  | 681.3203  | 670.3523  | 652.3417  | 653.3253  | 715.3743  | 697.3638  | 698.3473  | 714.3665  | 349.6736 | 335.6761 | 358.1872 | G   | 1218.6300 | 1200.6194 | 1201.6030 | 1192.6521 | 1174.6401 | 1175.6237 | 609.8150 | 596.8253 | 11 |    |
| 10 | 30.0343  | 755.3688  | 737.3582  | 738.3418  | 727.3738  | 709.3632  | 710.3468  | 772.3958  | 754.3853  | 755.3688  | 771.3879  | 378.1844 | 364.1869 | 386.6979 | G   | 1161.6085 | 1143.5979 | 1144.5815 | 1135.6292 | 1117.6187 | 1118.6022 | 581.3043 | 568.3146 | 10 |    |
| 11 | 74.0605  | 856.4164  | 838.4059  | 839.3895  | 828.4214  | 810.4109  | 811.3945  | 873.4435  | 855.4329  | 856.4164  | 872.4356  | 428.7082 | 414.7107 | 437.2217 | T   | 1104.5870 | 1086.5764 | 1087.5601 | 1078.6077 | 1060.5972 | 1061.5807 | 552.7935 | 539.8038 | 9  |    |
| 12 | 72.0812  | 955.4849  | 937.4743  | 938.4579  | 927.4899  | 909.4793  | 910.4629  | 972.5119  | 954.5013  | 955.4849  | 971.5040  | 478.2424 | 464.2449 | 486.7560 | V   | 1003.5394 | 985.5289  | 986.5125  | 977.5601  | 959.5495  | 960.5331  | 502.2697 | 489.2800 | 8  |    |
| 13 | 86.0969  | 1068.5690 | 1050.5585 | 1051.5420 | 1040.5740 | 1022.5634 | 1023.5470 | 1085.5959 | 1067.5854 | 1068.5690 | 1084.5881 | 534.7845 | 520.7870 | 543.2980 | L   | 904.4710  | 886.4604  | 887.4440  | 878.4916  | 860.4811  | 861.4647  | 452.7355 | 439.7458 | 7  |    |
| 14 | 44.0499  | 1139.6061 | 1121.5956 | 1122.5791 | 1111.6111 | 1093.6006 | 1094.5841 | 1156.5883 | 1138.6226 | 1139.6061 | 1155.6252 | 570.3030 | 556.3055 | 578.8165 | A   | 791.3870  | 773.3764  | 774.3600  | 765.4076  | 747.3970  | 748.3806  | 396.1935 | 383.2038 | 6  |    |
| 15 | 101.1078 | 1267.7009 | 1249.6742 | 1250.6740 | 1239.7059 | 1221.6954 | 1222.6790 | 1284.7279 | 1266.7174 | 1267.7009 | 1283.7201 | 634.3505 | 620.3530 | 642.8640 | K   | 720.3499  | 702.3393  | 703.3229  | 694.3705  | 676.3599  | 677.3435  | 360.6749 | 347.6852 | 5  |    |
| 16 | 104.0533 | 1398.7415 | 1380.7310 | 1381.7145 | 1370.7465 | 1352.7360 | 1353.7195 | 1415.7684 | 1397.7579 | 1398.7415 | 1414.7606 | 699.8707 | 685.8732 | 708.3842 | M   | 592.2549  | 574.2443  | 575.2279  | 566.2789  | 548.2650  | 549.2485  | 296.6274 | 283.6378 | 4  |    |
| 17 | 136.0761 | 1561.8048 | 1543.7943 | 1544.7778 | 1533.8098 | 1515.7993 | 1516.7828 | 1578.8318 | 1560.8213 | 1561.8048 | 1577.8240 | 781.4024 | 767.4049 | 789.9159 | Y   | 461.2144  | 443.2038  | 444.1874  | 435.2350  | 417.2245  | 418.2080  | 231.1072 | 218.1175 | 3  |    |
| 18 | 70.0656  | 1658.8575 | 1640.8470 | 1641.8306 | 1630.8625 | 1612.8521 | 1613.8356 | 1675.8845 | 1657.8740 | 1658.8575 | 1674.8767 | 829.9288 | 815.9313 | 838.4423 | P   | 298.1511  | 280.1405  | 281.1241  | 272.1717  | 254.1611  | 255.1447  | 149.5755 | 136.5858 | 2  |    |
| 19 | 129.1139 |           |           |           |           |           |           |           |           |           |           |          |          |          | R   | 201.0983  | 183.0877  | 184.0713  | 175.1189  | 157.1084  | 158.0919  | 101.0491 | 88.0595  | 1  |    |

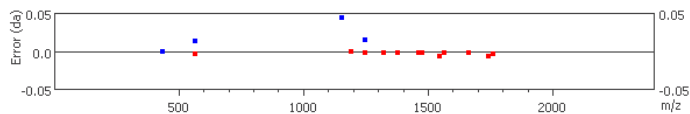

Supplement: supp_M112.024828_mcp.M112.024828-5.pdf [file supp_M112.024828_mcp.M112.024828-5.pdf]
